# Supplementary material for: Invasions of alien plants pose unprecedented challenges to China's nature reserves under climate change
Source: Research Square preprint supplement (doi:10.21203/rs.3.rs-6783801/v1), 2025-09-17
Supplement: Supplementary file 1 [file 2528e25d6cc78ce9abb292d6.docx]

**Biodiversity and Conservation**

**Supporting information**

**Invasions of alien plants pose unprecedented challenges to China's nature reserves under climate change**

Authors: Jia-Xin Wang, Rainer W. Bussmann, Fei Qin, Yun-Fen Liang, Bao-Cai Han, Hai-Yan Bi, Tian-Tian Xue, Sheng-Xiang Yu

Contents

1. Supplementary Figures (Figures S1–5)

2. Supplementary Tables (Tables S1–2)

**
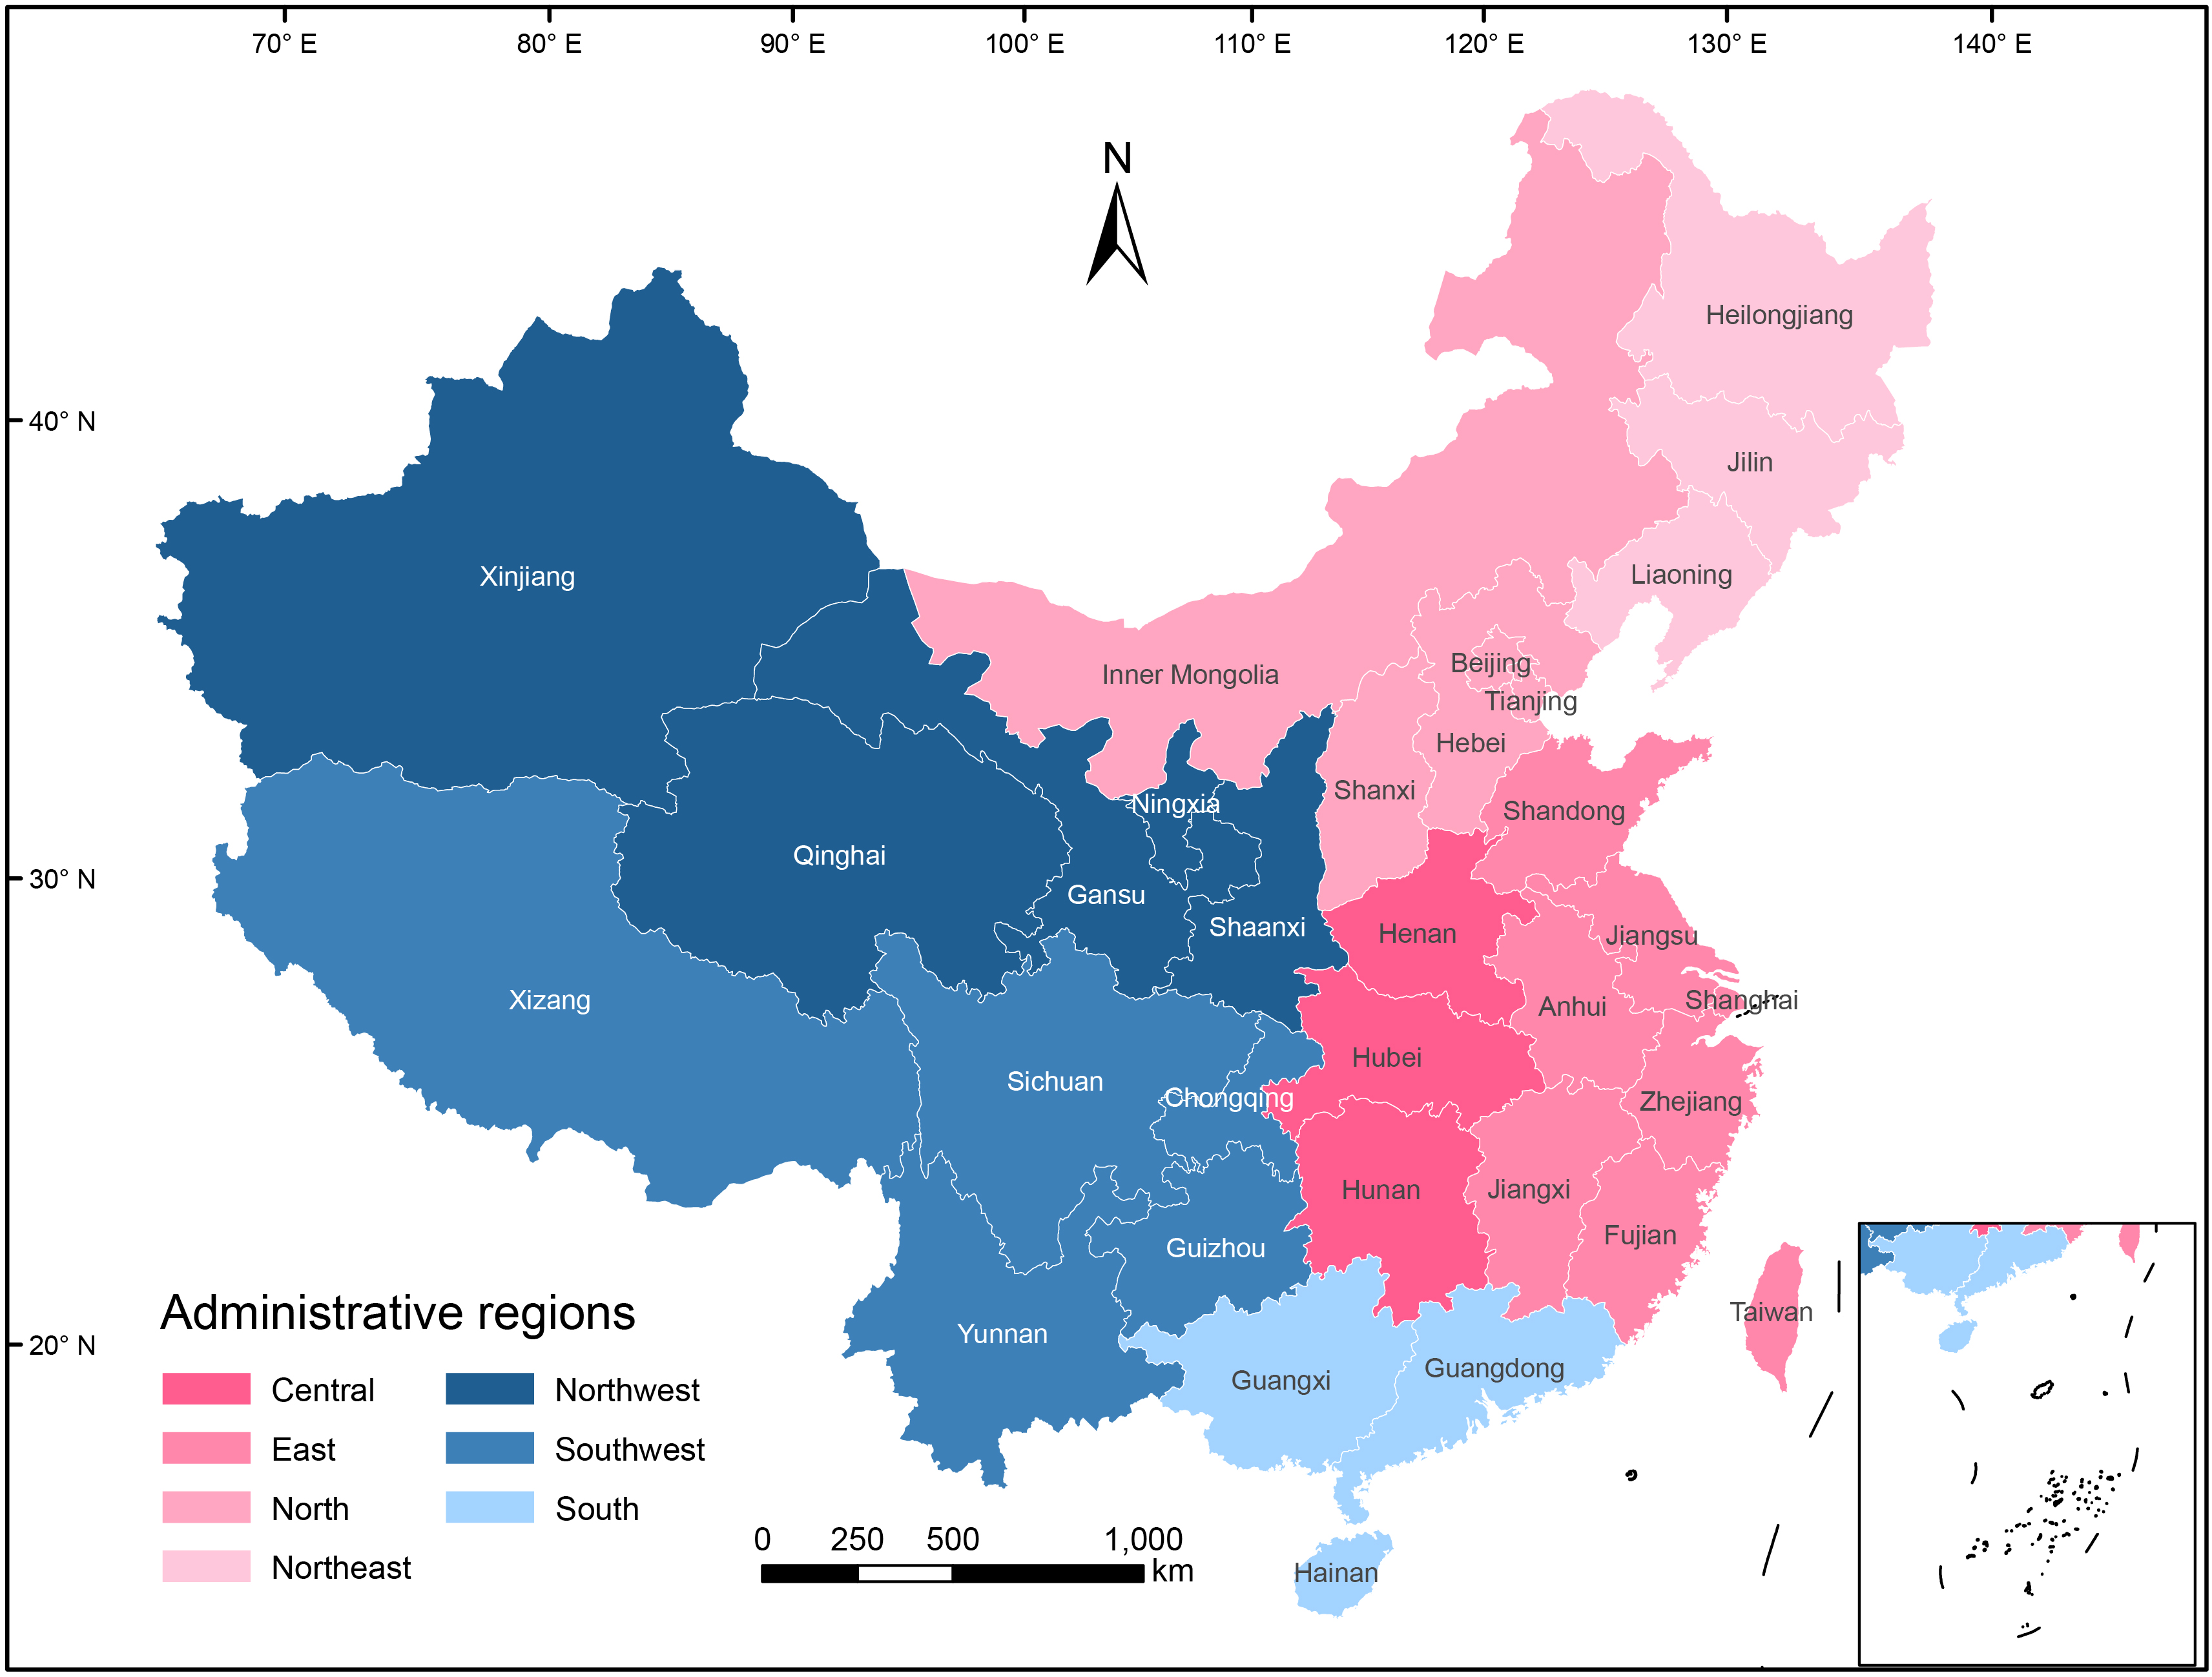
**

**Figure S1. Administrative regions of China.** We divided China into seven administrative regions (Northeast China, North China, East China, South China, Central China, Northwest China, and Southwest China) according to Cao et al. (2018).

**
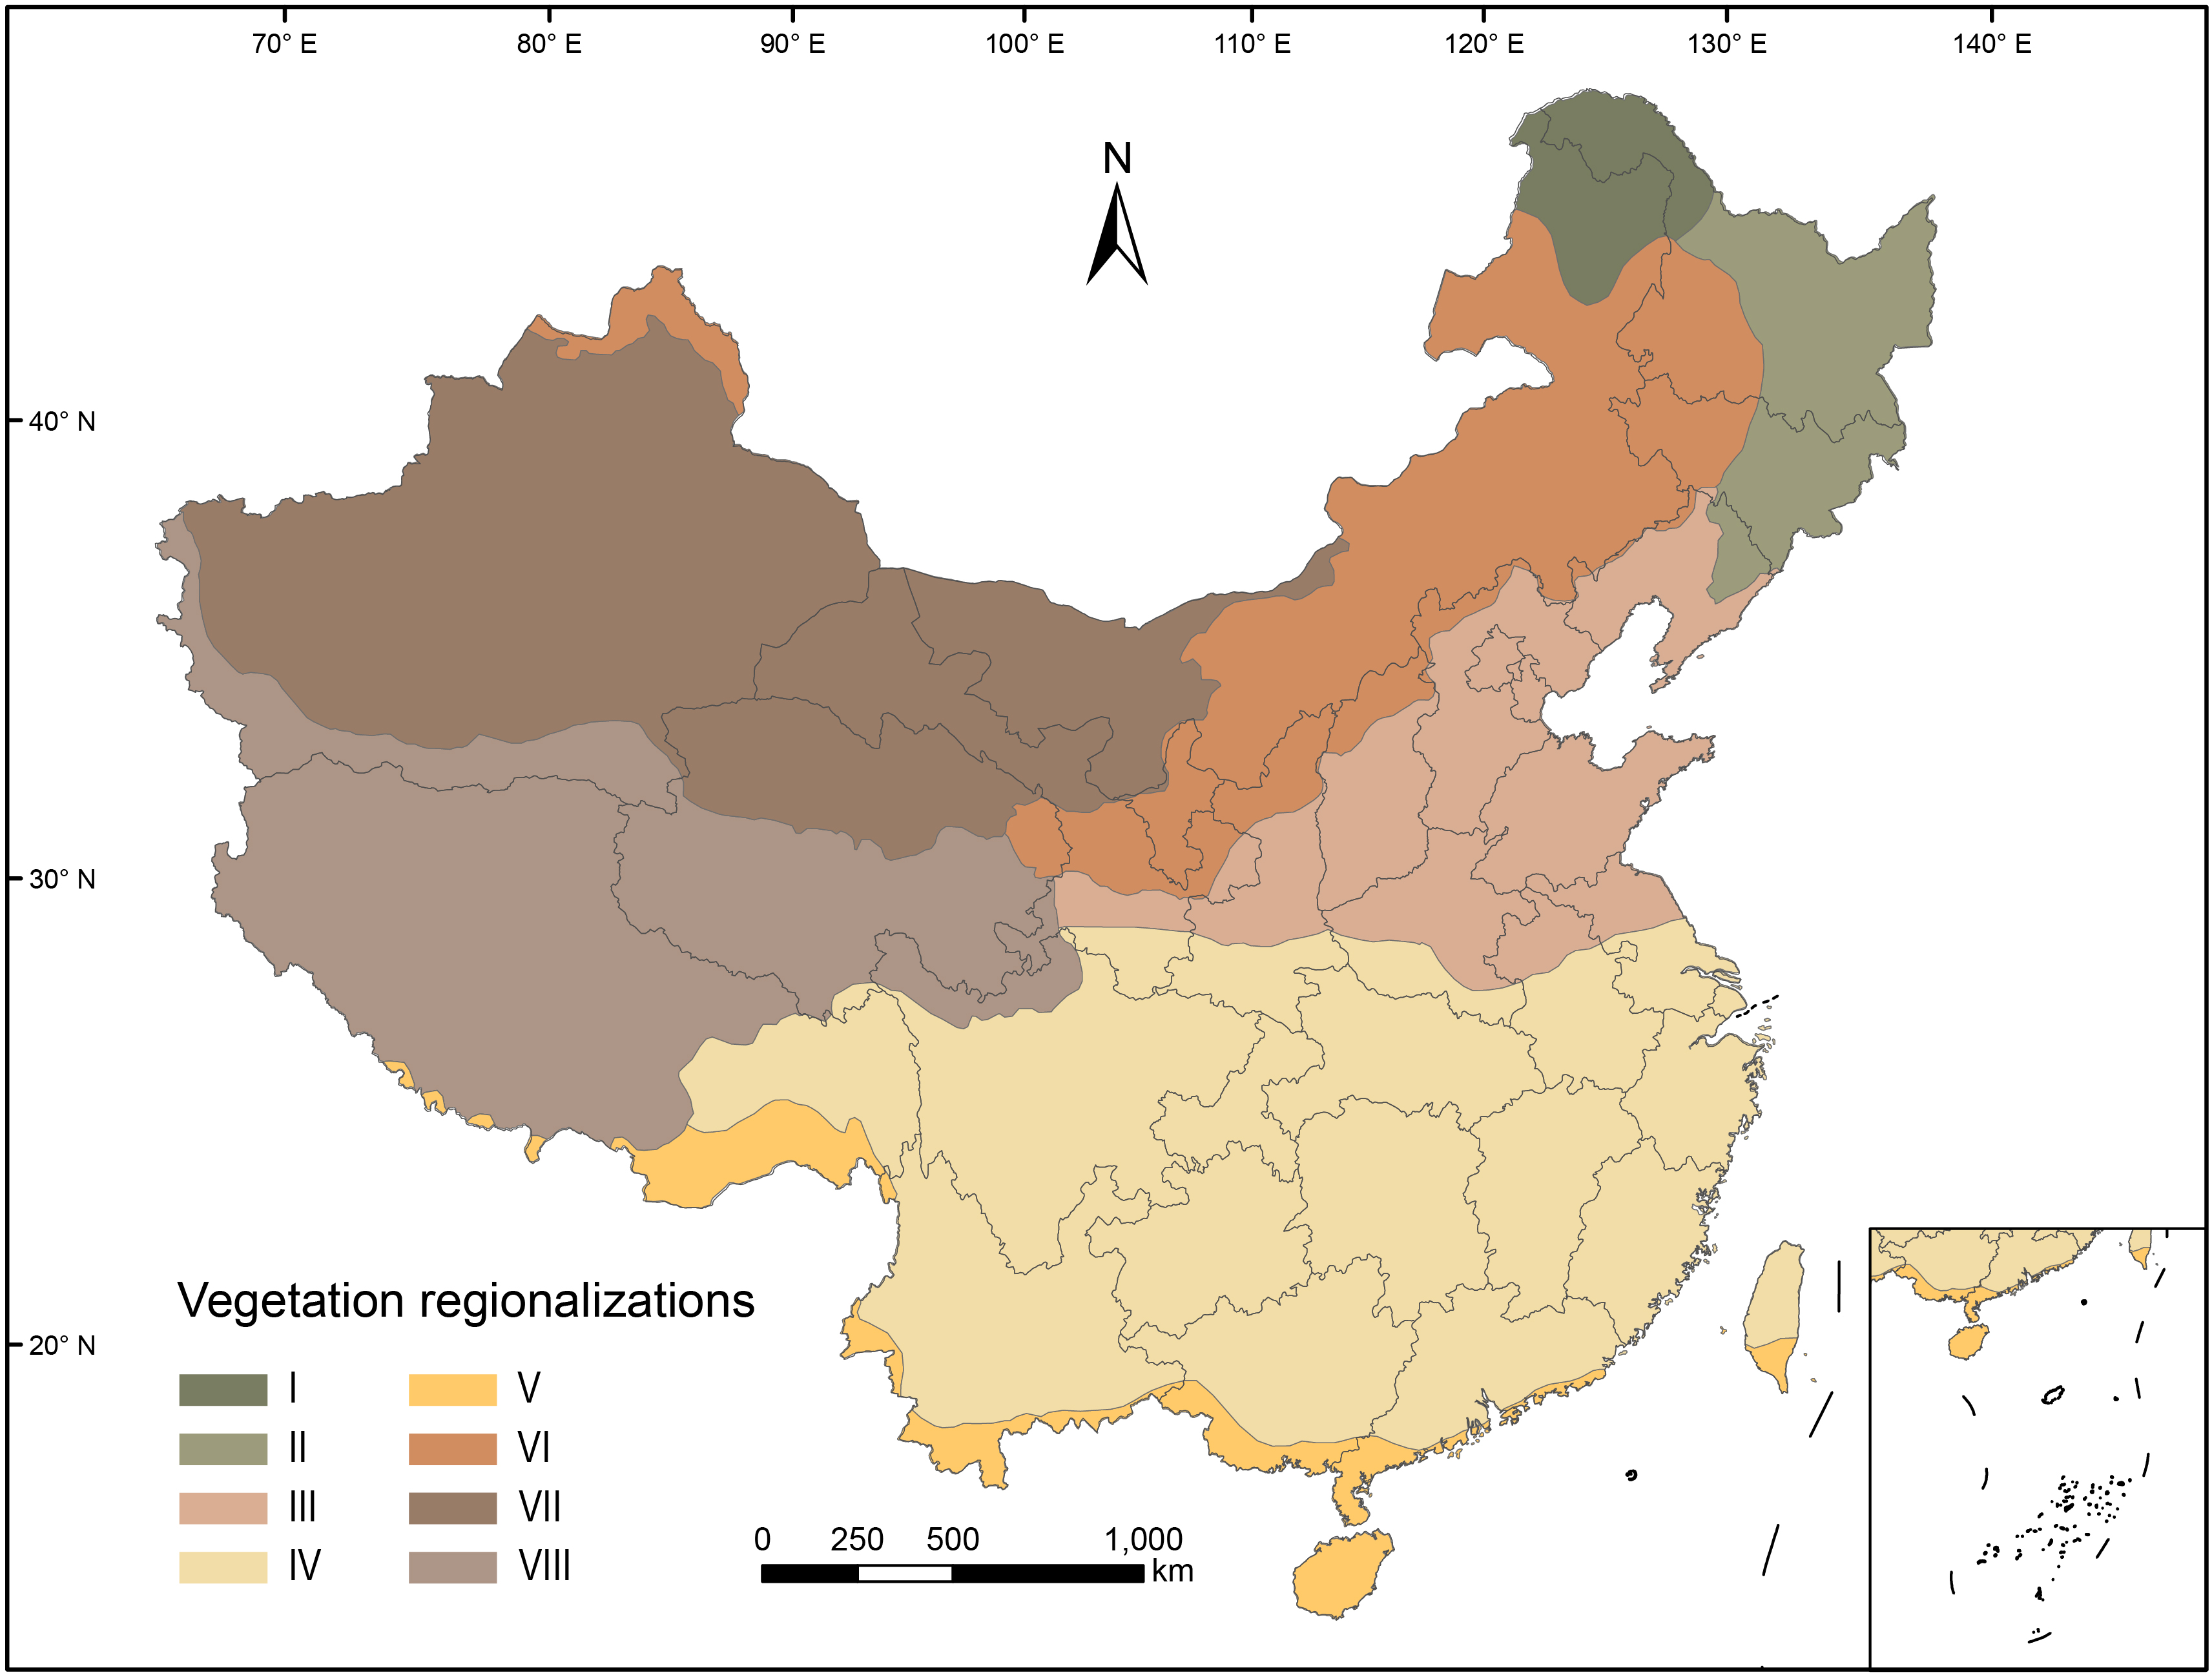
**

**Figure S2. Vegetation regionalization of China, digitized from Vegetation Atlas of China (1:1,000,000) by Hou Xueyu.** Ⅰ Cold-temperature (boreal) coniferous forest zone, Ⅱ Temperate mixed coniferous-broadleaved forest zone, Ⅲ Warm-temperate deciduous broadleaved forest zone, Ⅳ Subtropical evergreen broadleaved forest zone, Ⅴ Tropical rain forest and monsoon forest zone, Ⅵ Temperate steppe zone, Ⅶ Temperate desert zone, Ⅷ Tibetan high-cold plateau zone.


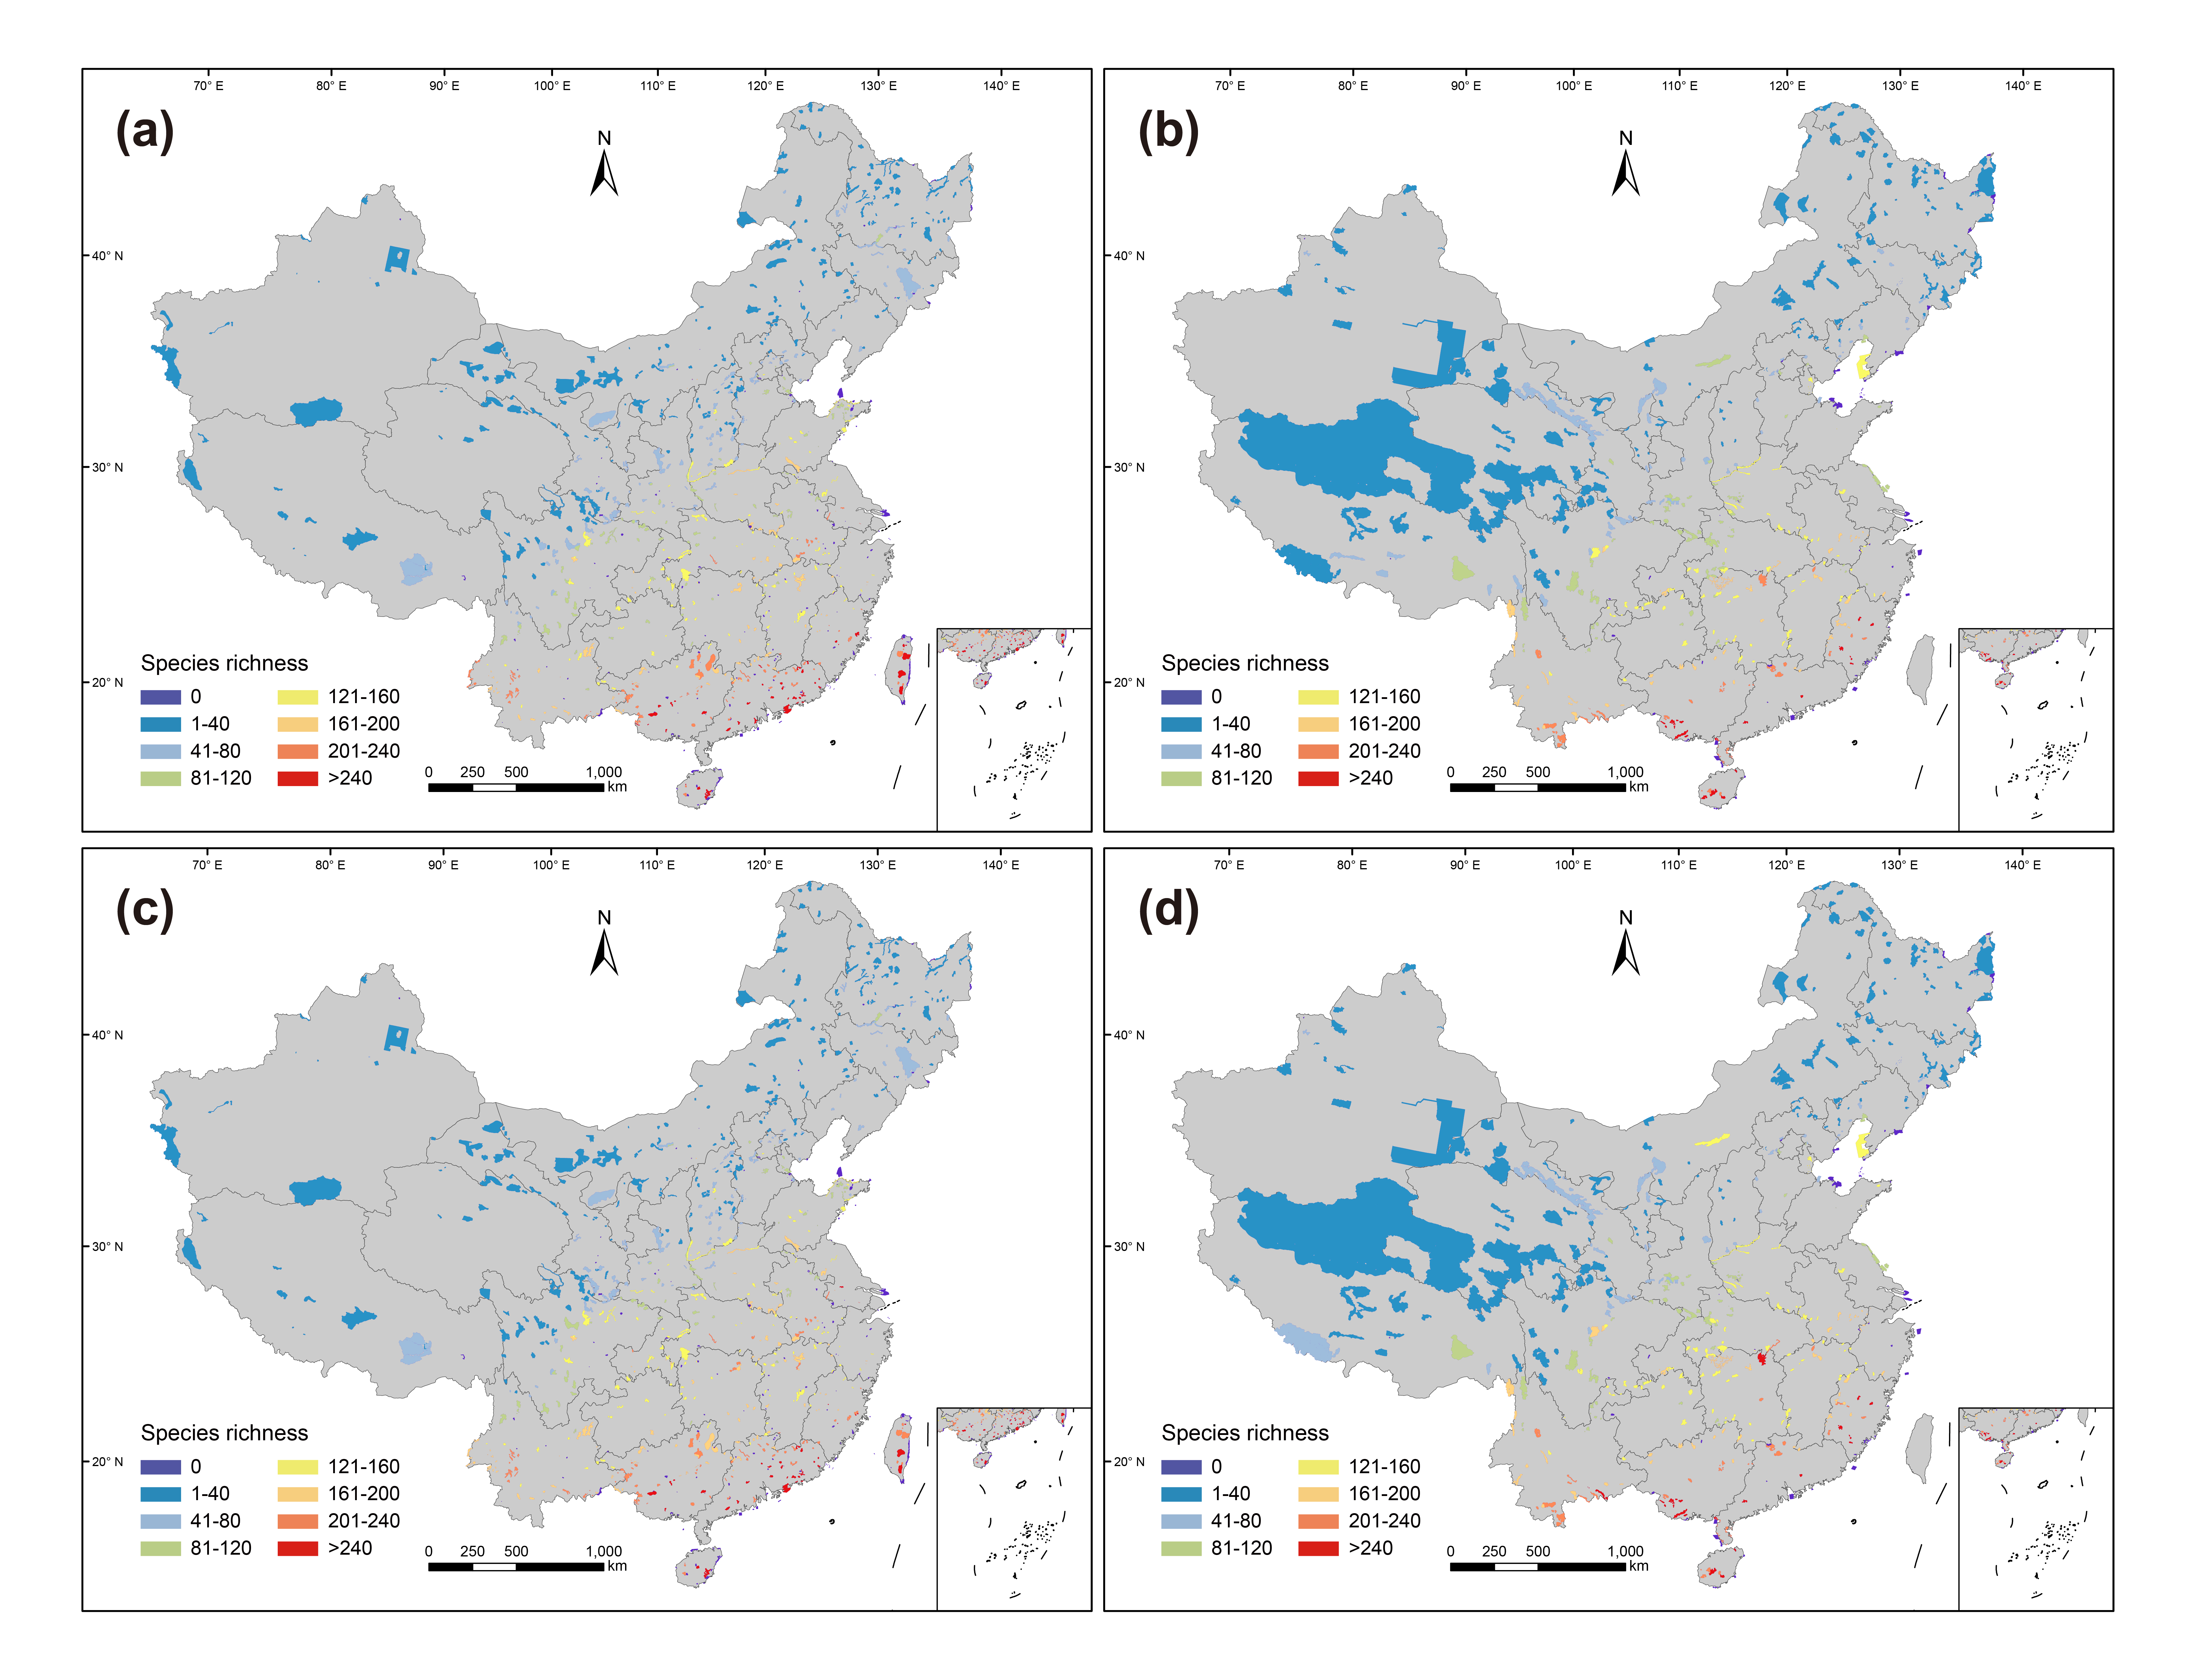


**Figure S3. Predicted IAP distribution patterns in nature reserves of China future climate scenarios.** (a) IAP richness in PNRs under RCP 2.6; (b) IAP richness in NNRs under RCP 2.6; (c) IAP richness in PNRs under RCP 4.5; (d) IAP richness in NNRs under RCP 4.5.


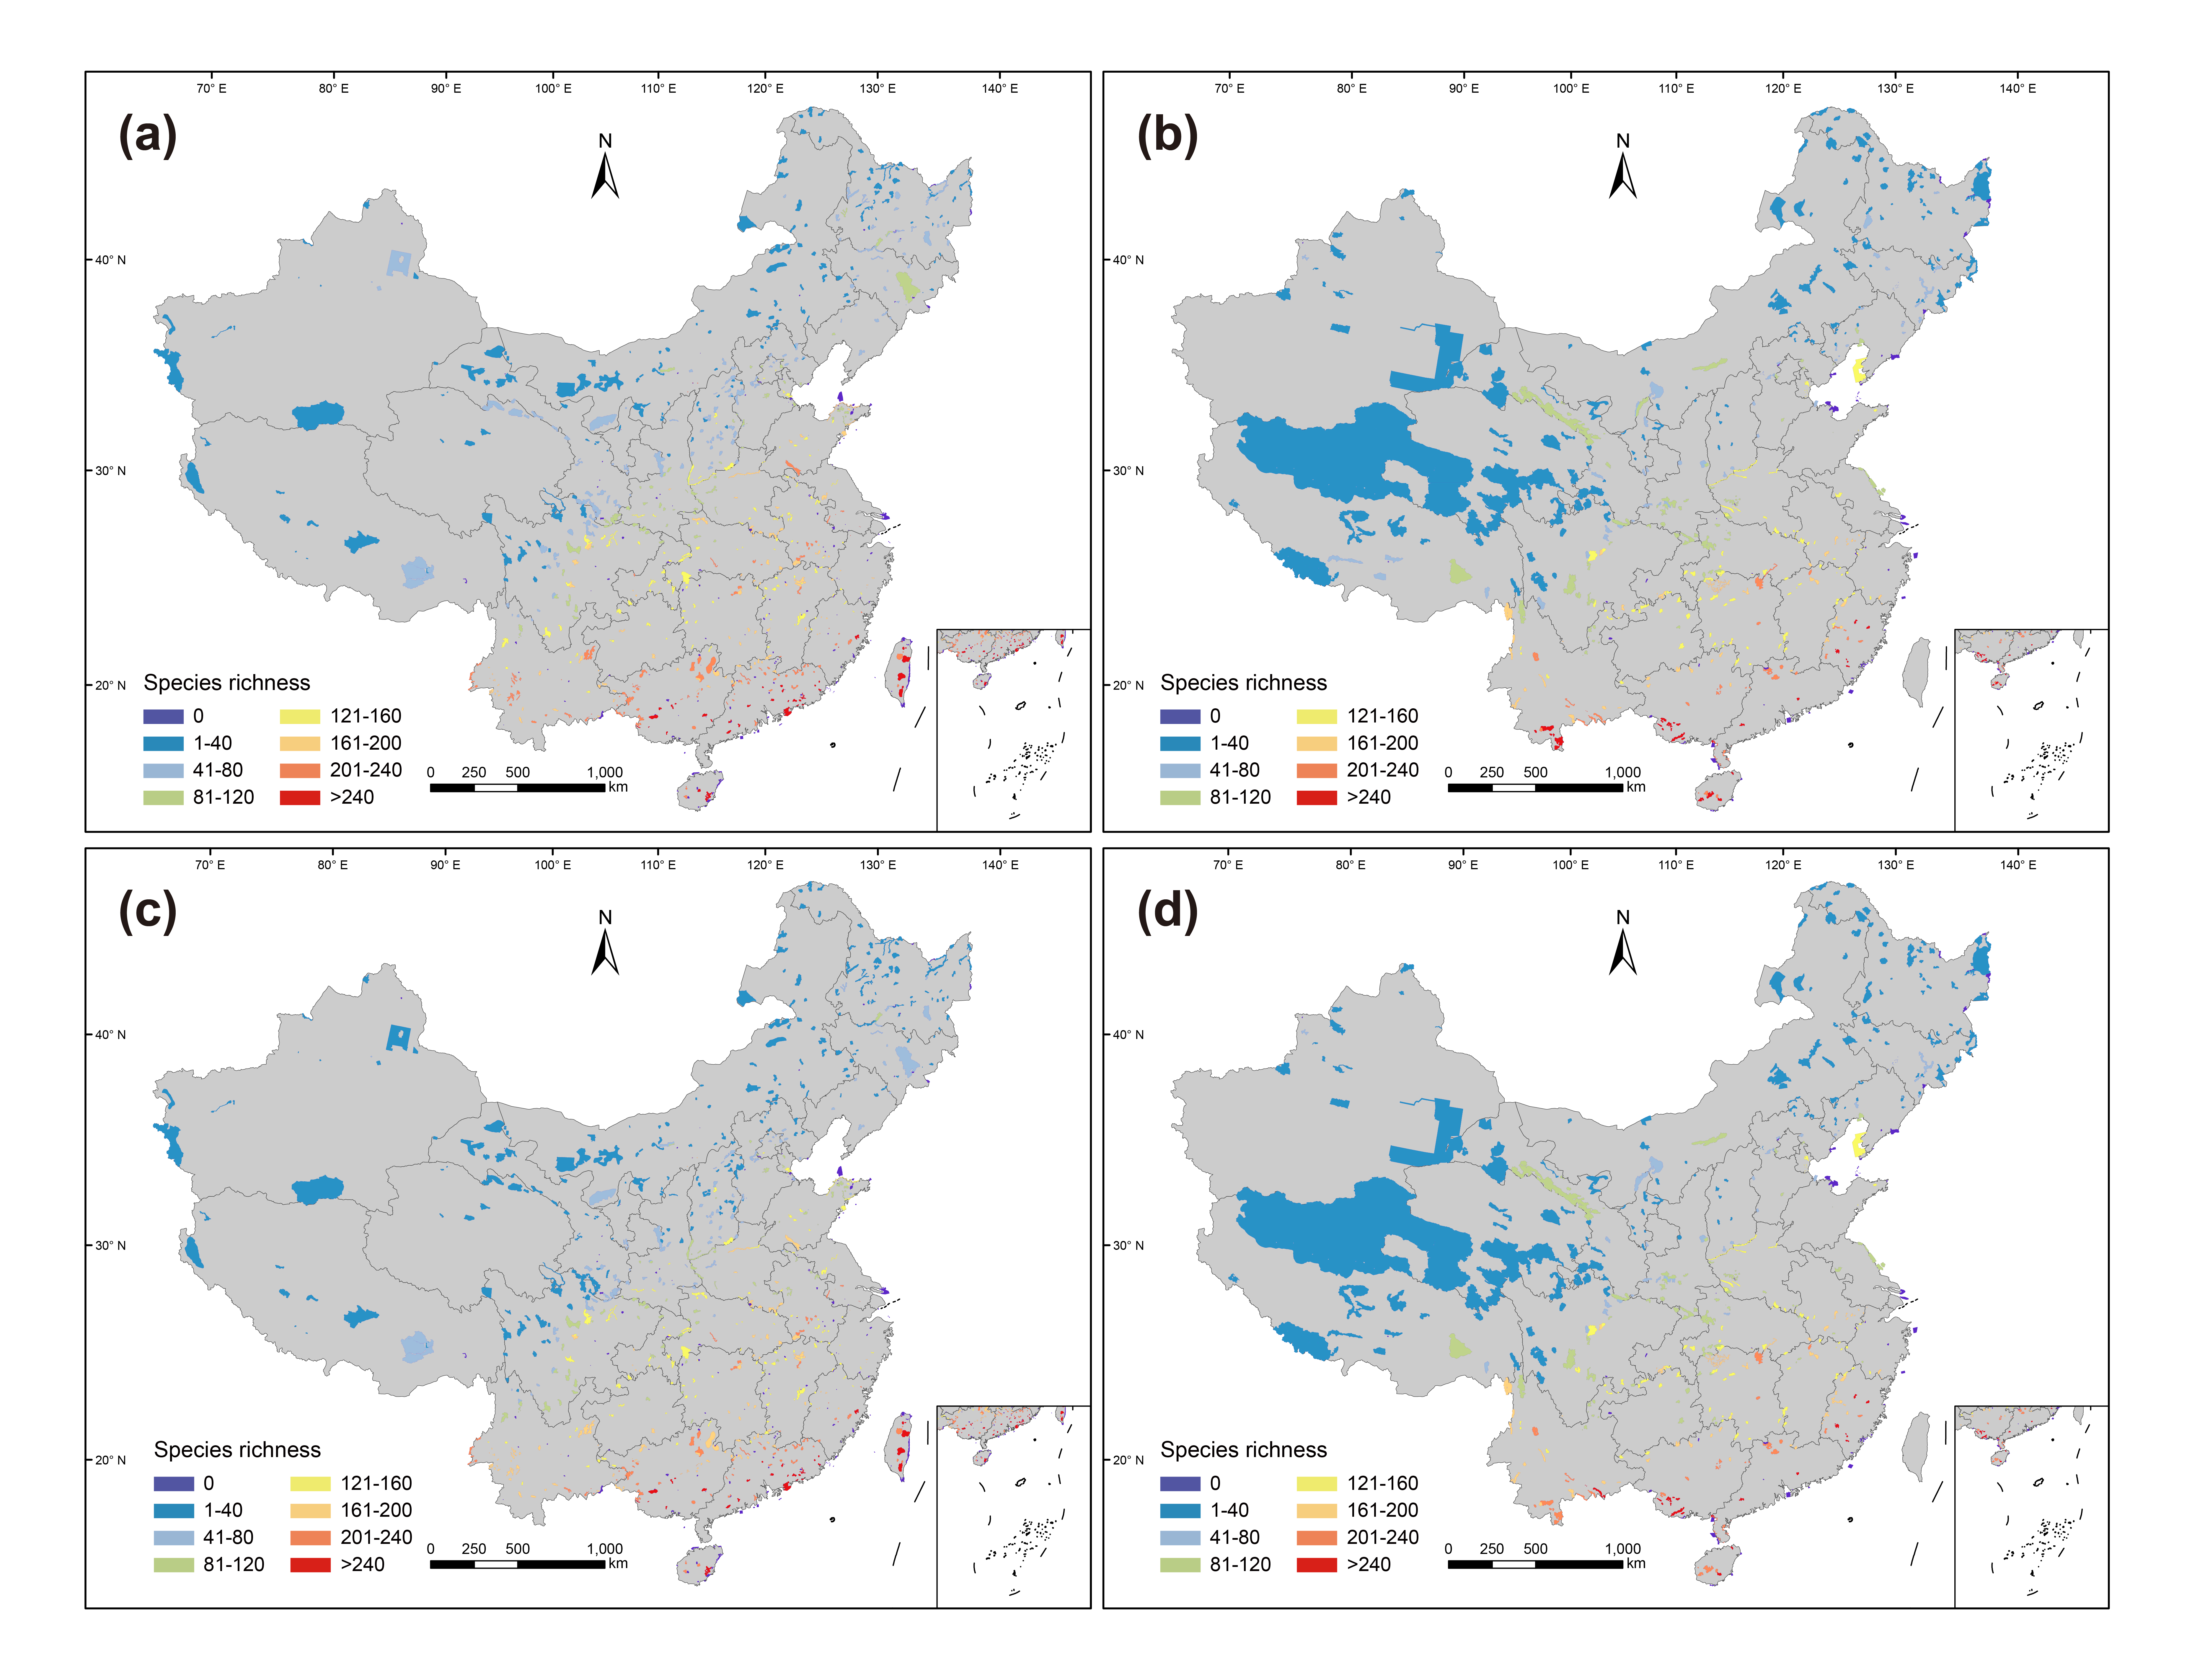


**Figure S4. Predicted IAP distribution patterns in nature reserves of China under future climate scenarios.** (a) IAP richness in PNRs under RCP 6.0; (b) IAP richness in NNRs under RCP 6.0; (c) IAP richness in PNRs under RCP 8.5; (d) IAP richness in NNRs under RCP 8.5.


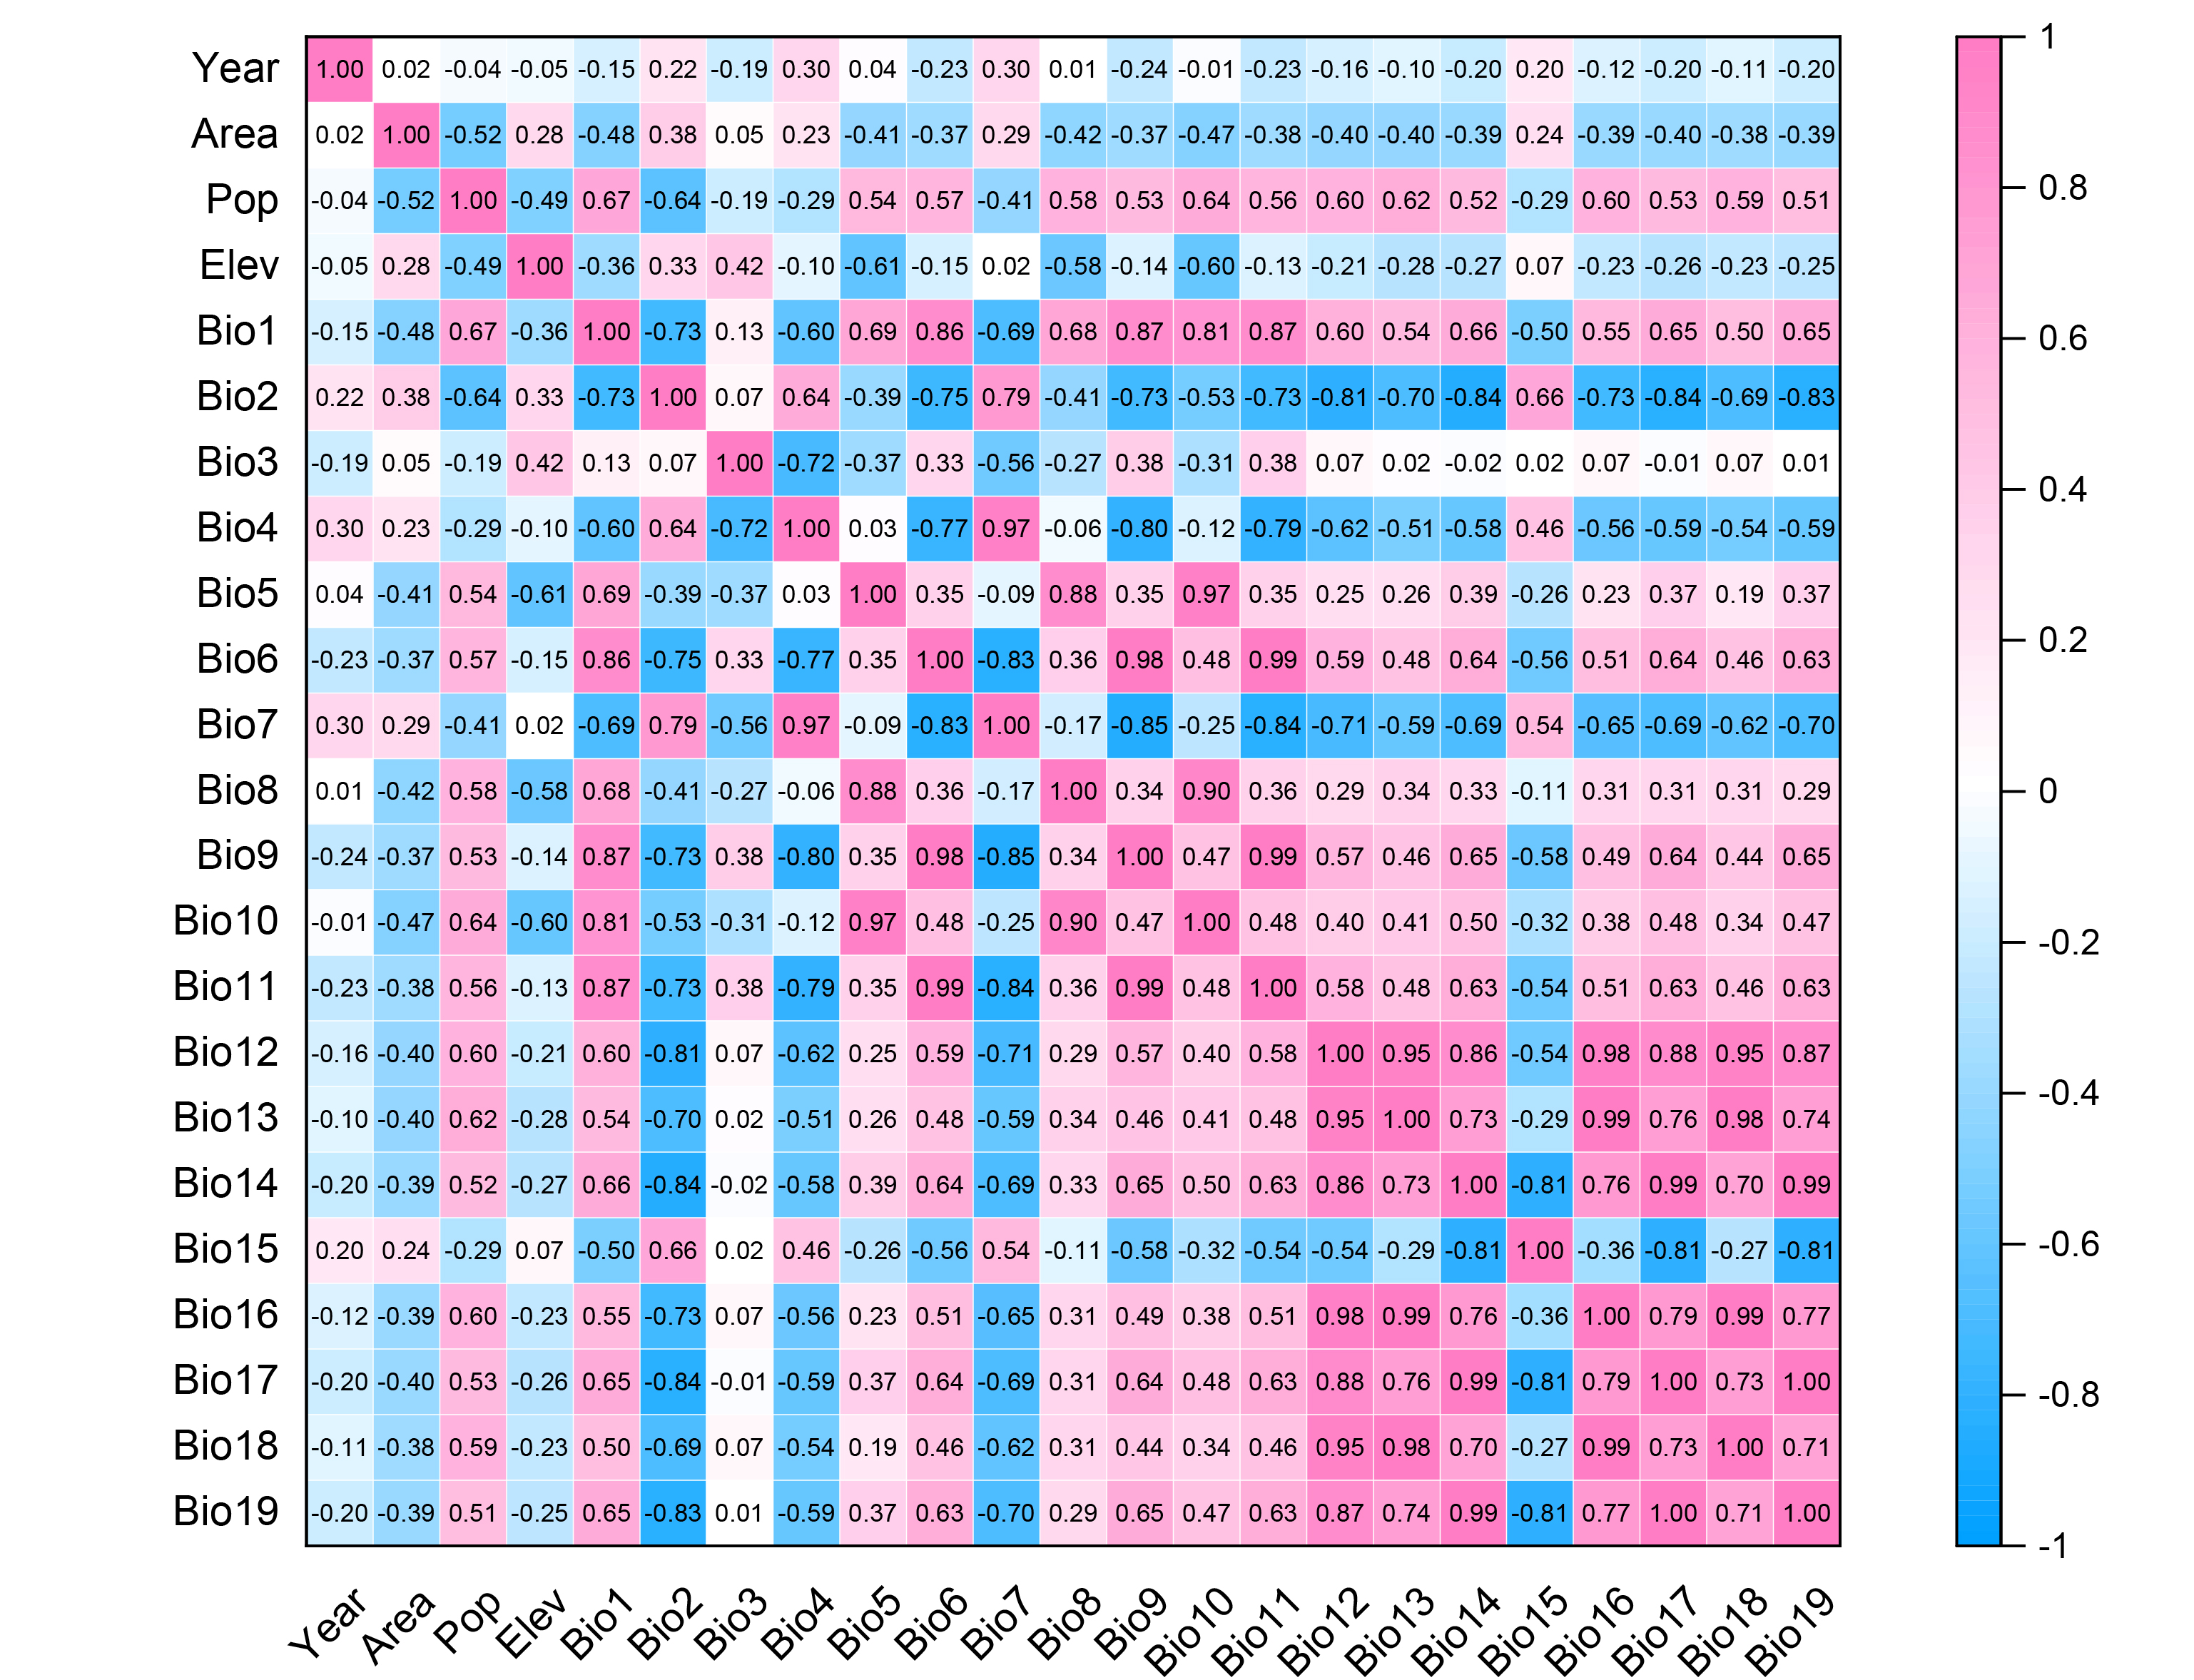


**Figure S5. Heat map of Pearson correlation analysis for all 23 explanatory variables.**


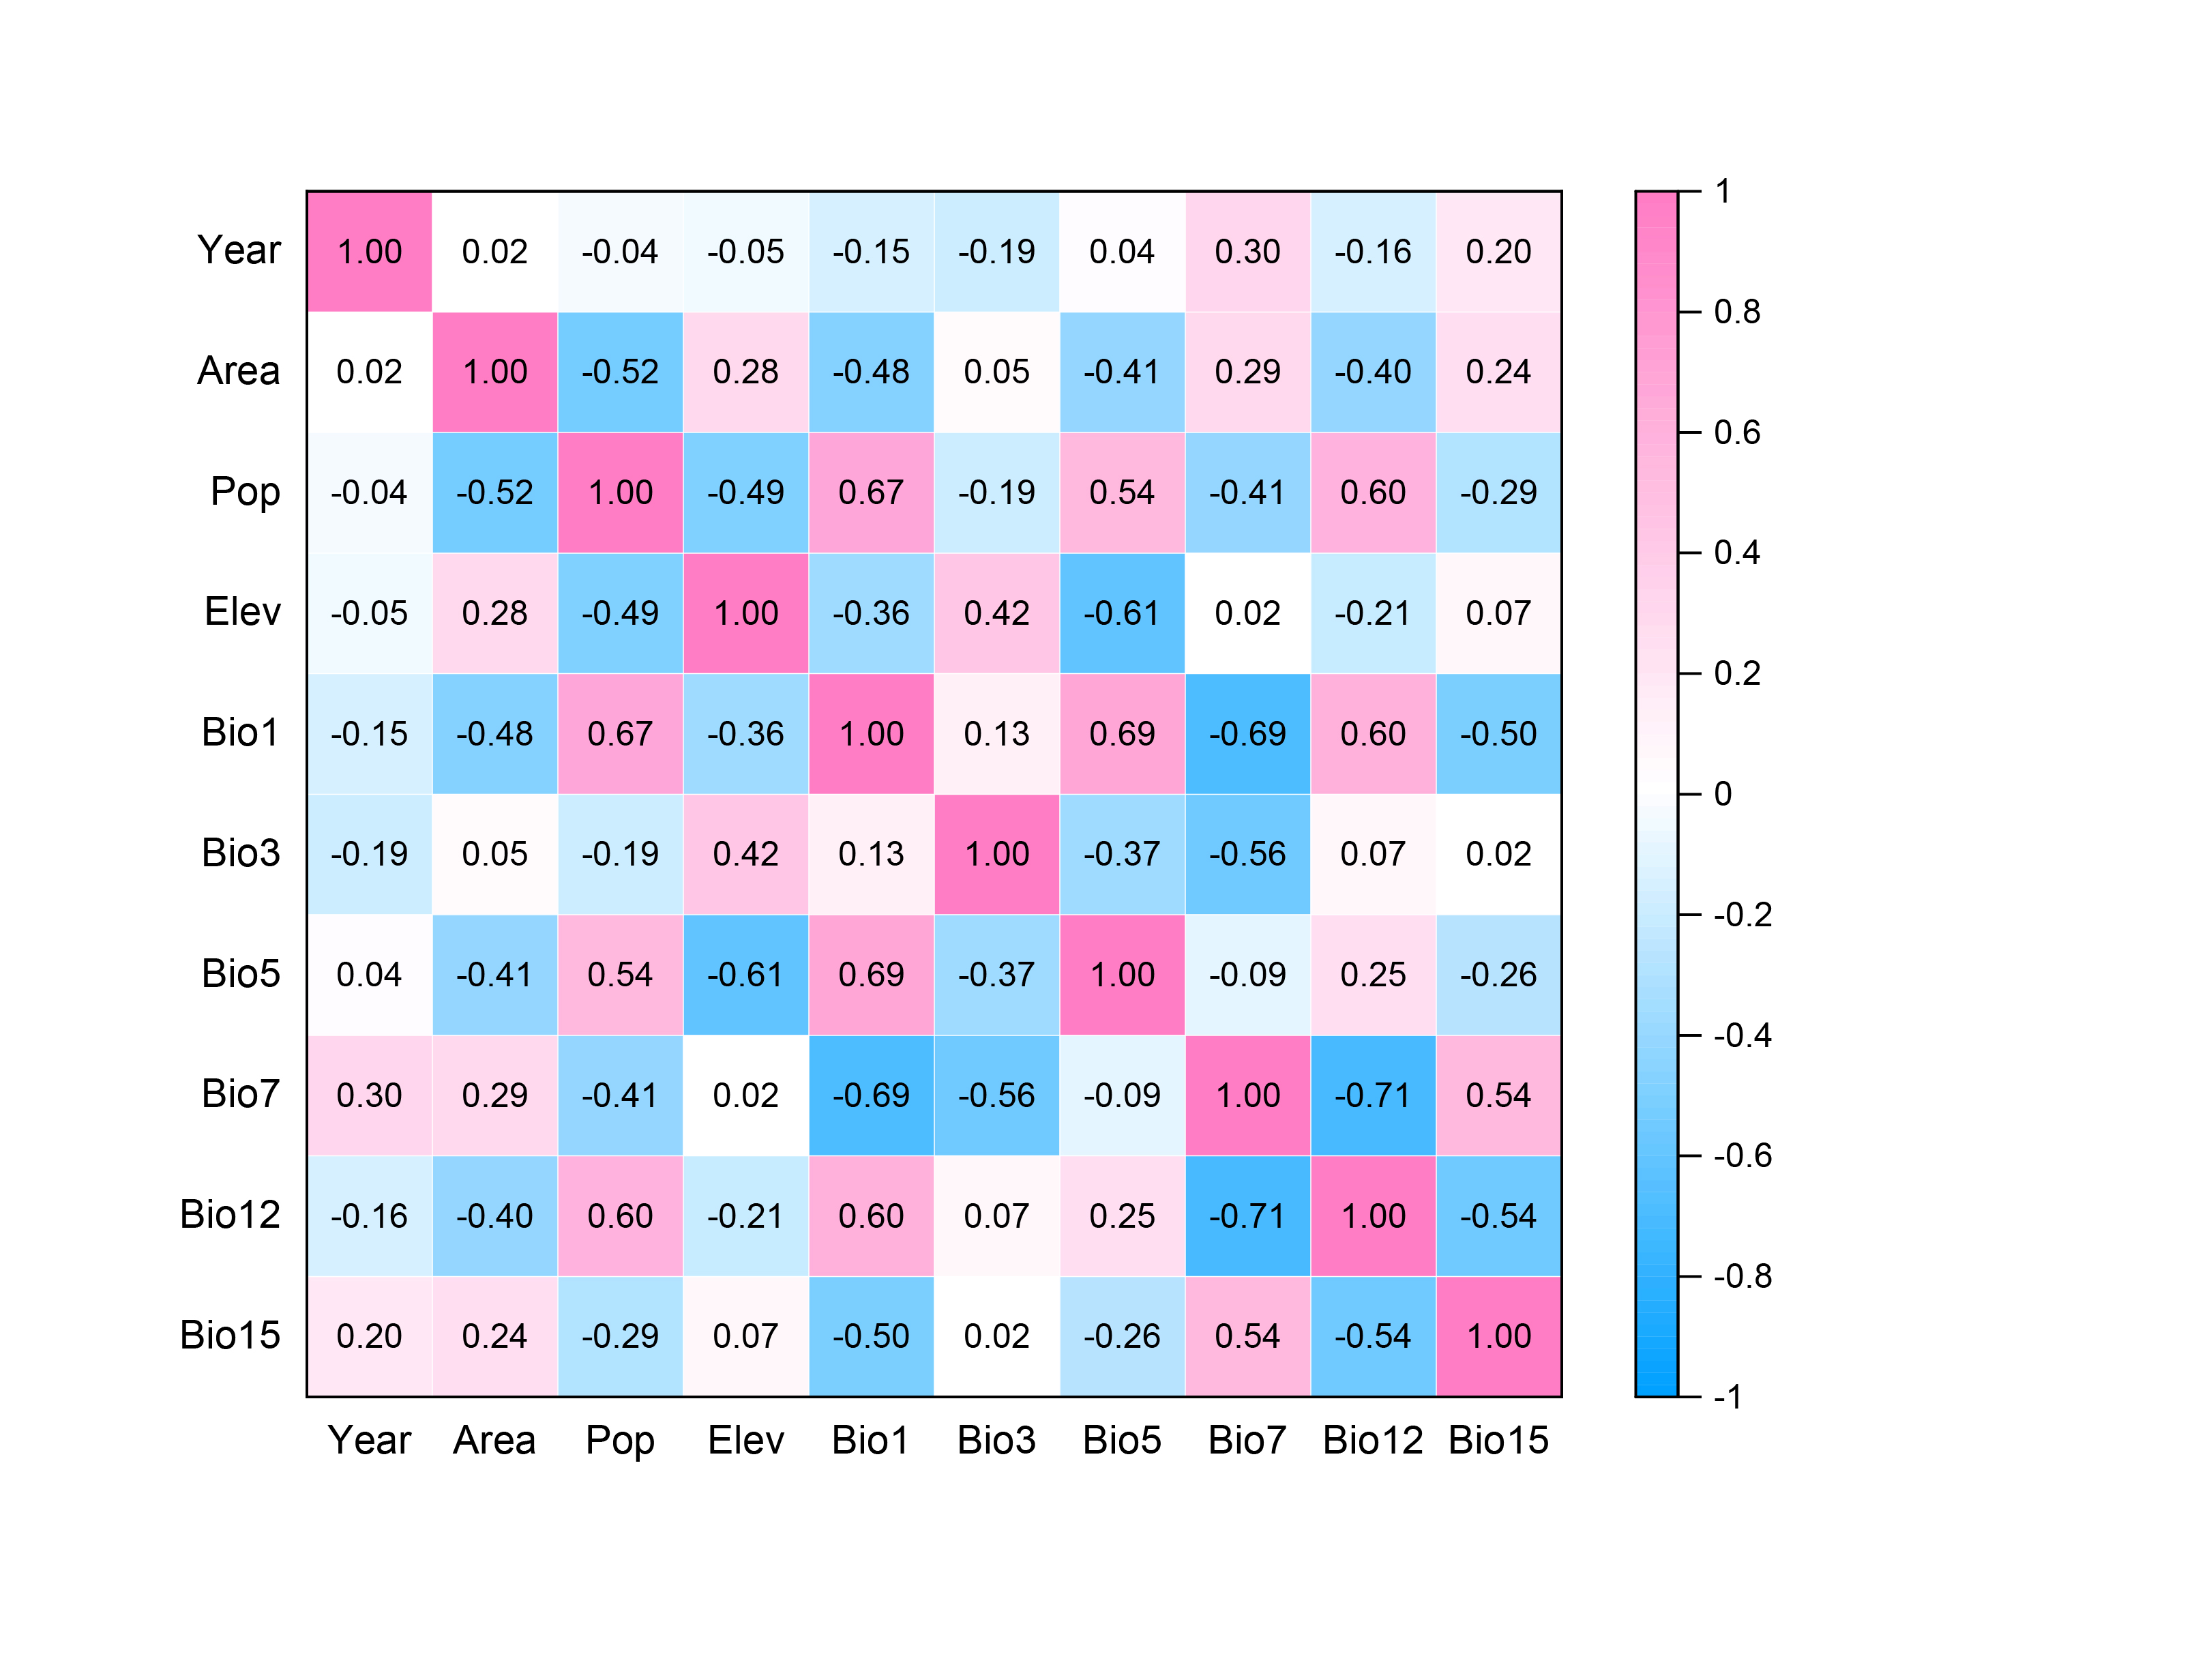


**Figure S6. Heat map of Pearson correlation analysis for 10 selected explanatory variables with correlation coefficients |r| ≤ 0.**

**Table S1.Nature reserves employed in this study (463 NNRs and 805 PNRs)**

| **Name** | **Type** | **Date of Establishment** | **Level** | **Area**  **(km2）** | **IAP richness (detected)** | **IAP richness (current)** | **IAP richness (RCP 2.6)** | **IAP richness (RCP 4.5)** | **IAP richness (RCP 6.0)** | **IAP richness (RCP 8.0)** |
| --- | --- | --- | --- | --- | --- | --- | --- | --- | --- | --- |
| Altun Mountains | Desert ecosystem | 19830516 | National | 45000 | 1 | 8 | 8 | 7 | 7 | 6 |
| Altay Koksu Wetland | Inland wetland | 20010905 | National | 306.67 | 5 | 31 | 27 | 31 | 29 | 29 |
| Ar Horqin | Steppe and meadow | 19991020 | National | 1367.94 | 0 | 19 | 18 | 16 | 15 | 14 |
| Ailao Mountains | Forest ecosystem | 19860320 | National | 677 | 0 | 164 | 154 | 149 | 150 | 143 |
| Ebinur Lake Wetland | Inland wetland | 20000616 | National | 2670.85 | 0 | 34 | 36 | 28 | 28 | 36 |
| Anhui Qingliangfeng | Forest ecosystem | 19790101 | National | 78.112 | 1 | 0 | 0 | 0 | 0 | 0 |
| Anhui Chinese Alligator Reserve | Wild animal | 19790101 | National | 185.65 | 0 | 185 | 181 | 182 | 186 | 186 |
| Anji Chinese Salamander Reserve | Wild animal | 19850807 | National | 12.425 | 3 | 145 | 151 | 148 | 148 | 142 |
| Annanba Wild Bactrian Camel Reserve | Wild animal | 19821119 | National | 3960 | 0 | 9 | 8 | 7 | 7 | 5 |
| Anxi Extremely Arid Desert | Desert ecosystem | 19870622 | National | 8000 | 2 | 17 | 18 | 19 | 19 | 17 |
| Bacha Island | Inland wetland | 19991001 | National | 320.14 | 0 | 16 | 18 | 19 | 15 | 16 |
| Badaogong Mountains | Forest ecosystem | 19820403 | National | 200 | 12 | 113 | 122 | 117 | 117 | 129 |
| Bamian Mountain | Forest ecosystem | 19820403 | National | 109.74 | 1 | 126 | 134 | 126 | 129 | 127 |
| Baxian Mountain | Forest ecosystem | 19841230 | National | 10.49 | 6 | 80 | 102 | 81 | 89 | 80 |
| Badong Golden Snub-nosed Monkey Reserve | Wild animal | 20020425 | National | 209.1 | 6 | 101 | 97 | 96 | 105 | 104 |
| Barluk Mountains | Forest ecosystem | 19800401 | National | 1150.37 | 3 | 20 | 22 | 22 | 20 | 22 |
| Bayinbuluk | Wild animal | 19800609 | National | 1000 | 3 | 14 | 19 | 18 | 22 | 15 |
| Bawangling | Wild animal | 19800129 | National | 299.8 | 6 | 237 | 237 | 222 | 235 | 234 |
| Baihe | Wild animal | 19630402 | National | 162.043 | 1 | 25 | 26 | 19 | 26 | 25 |
| Bailang Mountain | Forest ecosystem | 20010709 | National | 174.4 | 3 | 38 | 42 | 36 | 43 | 32 |
| Baima Snow Mountain | Forest ecosystem | 19830427 | National | 2764 | 26 | 95 | 91 | 89 | 94 | 96 |
| Baishan Forest Musk Deer Reserve | Wild animal | 20061229 | National | 219.95 | 0 | 0 | 0 | 0 | 0 | 0 |
| Baishilazi | Forest ecosystem | 19810901 | National | 74.67 | 2 | 47 | 51 | 38 | 44 | 40 |
| Baishui River | Forest ecosystem | 19961231 | National | 301.5 | 1 | 147 | 148 | 146 | 144 | 145 |
| Baishuijiang | Wild animal | 19630101 | National | 1837.99 | 18 | 89 | 96 | 86 | 79 | 80 |
| Baiyin Aobao | Forest ecosystem | 19791224 | National | 138.62 | 0 | 9 | 13 | 11 | 11 | 12 |
| Baiyun Mountain | Forest ecosystem | 19980902 | National | 201.586 | 21 | 127 | 135 | 117 | 121 | 133 |
| Baihua Mountain | Forest ecosystem | 19850401 | National | 217.431 | 21 | 95 | 112 | 103 | 97 | 95 |
| Bangliang Gibbon Reserve | Wild animal | 20090716 | National | 65.3 | 3 | 0 | 0 | 0 | 0 | 0 |
| Baoqing Qixing River Reserve | Inland wetland | 19911017 | National | 200 | 0 | 17 | 19 | 17 | 16 | 15 |
| Baotianman | Forest ecosystem | 19800430 | National | 54.125 | 38 | 0 | 0 | 0 | 0 | 0 |
| Beiji Village | Forest ecosystem | 20020910 | National | 1375.53 | 0 | 8 | 9 | 7 | 8 | 7 |
| Beijing Songshan | Forest ecosystem | 19850401 | National | 62.1296 | 8 | 0 | 0 | 0 | 0 | 0 |
| Beilun Estuary | Ocean and seacoast | 19900317 | National | 30 | 1 | 0 | 0 | 0 | 0 | 0 |
| Beipiao Bird Fossil Reserve | Ancient organism remains | 19970518 | National | 46.3 | 0 | 29 | 29 | 27 | 27 | 25 |
| Bilah River | Inland wetland | 20040721 | National | 566.04 | 0 | 9 | 7 | 10 | 10 | 11 |
| Bishui Chinese Merganser Reserve | Wild animal | 19970501 | National | 25.35 | 1 | 22 | 28 | 23 | 22 | 22 |
| Binzhou Beike Dike Island and Wetland | Ocean and seacoast | 19991018 | National | 435.415 | 0 | 59 | 58 | 52 | 56 | 44 |
| Boro Lake | Inland wetland | 20041025 | National | 249.15 | 0 | 33 | 46 | 40 | 44 | 37 |
| Beavers of Buerjin River | Wild animal | 19800609 | National | 50 | 0 | 11 | 10 | 12 | 9 | 11 |
| Cangshan-Erhai | Inland wetland | 19811106 | National | 797 | 48 | 212 | 218 | 213 | 204 | 201 |
| Cenwanglao Mountain | Forest ecosystem | 19820608 | National | 189.94 | 34 | 188 | 199 | 178 | 182 | 186 |
| Chagan Lake | Inland wetland | 19860802 | National | 506.84 | 0 | 40 | 47 | 37 | 46 | 40 |
| White-lipped Deer of Chaqingsongduo | Wild animal | 19951108 | National | 1436.83 | 0 | 12 | 12 | 13 | 16 | 14 |
| Chayu Cibagou | Forest ecosystem | 19850923 | National | 1014 | 1 | 55 | 48 | 49 | 60 | 63 |
| Qaidam Basin Haloxylon Forest | Desert ecosystem | 20000523 | National | 3733.91 | 0 | 11 | 13 | 13 | 12 | 12 |
| Changli Golden Coast | Ocean and seacoast | 19900930 | National | 336.205 | 0 | 0 | 0 | 0 | 0 | 0 |
| Chebaling | Forest ecosystem | 19810704 | National | 75.45 | 4 | 184 | 186 | 183 | 179 | 185 |
| Chengshantou Coastal Geomorphology | Geological formation | 19890401 | National | 13.5 | 0 | 0 | 0 | 0 | 0 | 0 |
| Chishui Alsophila (Tree Fern) Reserve | Wild plant | 19840911 | National | 133 | 6 | 119 | 128 | 108 | 117 | 117 |
| Chongming Dongtan Bird Reserve | Wild animal | 19981116 | National | 241.55 | 0 | 0 | 0 | 0 | 0 | 0 |
| Chongzuo White-headed Langur Reserve | Wild animal | 19801001 | National | 255.78 | 5 | 273 | 281 | 274 | 274 | 270 |
| Chuona River | Inland wetland | 20020910 | National | 1055.8 | 0 | 10 | 9 | 8 | 11 | 8 |
| Cuibei Wetland | Inland wetland | 20011015 | National | 277.3 | 0 | 10 | 14 | 9 | 13 | 9 |
| Dalinor Lake | Wild animal | 19871029 | National | 1194.13 | 5 | 14 | 18 | 17 | 15 | 17 |
| Daba Mountains | Forest ecosystem | 19790501 | National | 1157.5 | 30 | 95 | 96 | 91 | 95 | 105 |
| Dabie Mountains | Forest ecosystem | 20030928 | National | 160.482 | 8 | 119 | 126 | 114 | 119 | 122 |
| Dabusu | Geological formation | 19930312 | National | 110 | 0 | 25 | 27 | 23 | 23 | 26 |
| Dafeng Père David’s Deer Reserve | Wild animal | 19860208 | National | 26.6667 | 0 | 0 | 0 | 0 | 0 | 0 |
| Dagui Mountains Crocodile Lizard Reserve | Wild animal | 20050422 | National | 37.8 | 0 | 231 | 224 | 225 | 237 | 221 |
| Dahaituo | Forest ecosystem | 19990707 | National | 126.34 | 4 | 52 | 63 | 49 | 54 | 54 |
| Dalaoling | Forest ecosystem | 20010101 | National | 142.25 | 1 | 133 | 148 | 137 | 131 | 140 |
| Dalian Spotted Seal Reserve | Wild animal | 19920920 | National | 5619.75 | 15 | 124 | 129 | 129 | 129 | 135 |
| Daming Mountain | Forest ecosystem | 19810805 | National | 169.94 | 15 | 237 | 236 | 235 | 233 | 233 |
| Dapan Mountain | Wild plant | 19930420 | National | 45.58 | 8 | 0 | 0 | 0 | 0 | 0 |
| Daqinggou | Forest ecosystem | 19800414 | National | 81.83 | 7 | 38 | 39 | 31 | 30 | 31 |
| Dasha River | Forest ecosystem | 19841013 | National | 269.9 | 6 | 145 | 154 | 142 | 149 | 150 |
| Dashanbao Black-necked Crane Reserve | Wild animal | 19900101 | National | 192 | 0 | 104 | 97 | 109 | 94 | 104 |
| Datian | Wild animal | 19760616 | National | 25 | 3 | 231 | 238 | 223 | 238 | 225 |
| Datong-Beichuan River Source Area | Forest ecosystem | 20051017 | National | 1078.7 | 1 | 38 | 40 | 32 | 39 | 33 |
| Grand Khingan Mountains Hanma | Forest ecosystem | 19950529 | National | 1073.48 | 5 | 13 | 11 | 11 | 10 | 9 |
| Dazhanhe Wetland | Inland wetland | 20010801 | National | 2116.18 | 0 | 15 | 16 | 12 | 18 | 11 |
| Dazhou Island | Wild animal | 19870801 | National | 70 | 0 | 0 | 0 | 0 | 0 | 0 |
| Daiyun Mountain | Forest ecosystem | 19850516 | National | 134.724 | 0 | 222 | 220 | 213 | 221 | 212 |
| Dandong Yalu River Estuary Wetland | Ocean and seacoast | 19870701 | National | 814.3 | 5 | 0 | 0 | 0 | 0 | 0 |
| Danjiang Wetland | Inland wetland | 20010810 | National | 640.27 | 0 | 105 | 113 | 101 | 108 | 108 |
| Danxia Mountain | Geological formation | 19951028 | National | 280 | 2 | 225 | 220 | 224 | 228 | 233 |
| Diaoluoshan | Forest ecosystem | 19840429 | National | 183.89 | 4 | 266 | 254 | 249 | 257 | 255 |
| Dinghushan | Forest ecosystem | 19560227 | National | 11.33 | 50 | 0 | 0 | 0 | 0 | 0 |
| Dong’an Shunhuang Mountain | Forest ecosystem | 19840509 | National | 131.399 | 3 | 157 | 163 | 162 | 163 | 159 |
| East Dongting Lake | Inland wetland | 19820403 | National | 1900 | 0 | 239 | 230 | 231 | 225 | 241 |
| Dongfanghong Wetland | Wild animal | 20010801 | National | 1319.82 | 0 | 0 | 0 | 0 | 0 | 0 |
| Dongzhai Port | Ocean and seacoast | 19800103 | National | 33.37 | 0 | 272 | 275 | 264 | 276 | 270 |
| Dongzhai | Wild animal | 19820624 | National | 468 | 15 | 150 | 156 | 141 | 148 | 159 |
| Source of Duhe River | Wild animal | 19871210 | National | 471.73 | 1 | 93 | 97 | 88 | 88 | 99 |
| Dunhuang Xihu | Wild animal | 19921214 | National | 6600 | 0 | 9 | 7 | 8 | 8 | 7 |
| Dunhuang Yangguan | Inland wetland | 19940704 | National | 881.777 | 0 | 11 | 11 | 9 | 9 | 7 |
| Duobukuer | Inland wetland | 20020101 | National | 1289.59 | 0 | 12 | 9 | 12 | 11 | 10 |
| Duo’er | Wild animal | 20041209 | National | 545.75 | 5 | 28 | 30 | 25 | 30 | 28 |
| Ergun | Forest ecosystem | 19980310 | National | 1245.27 | 0 | 9 | 8 | 10 | 10 | 7 |
| Ejin Populus euphratica Forest | Desert ecosystem | 19920630 | National | 262.53 | 1 | 5 | 7 | 4 | 9 | 4 |
| Ordos Relict Gull Reserve | Wild animal | 19980526 | National | 147.7 | 0 | 26 | 33 | 28 | 27 | 26 |
| Etuoke Dinosaur Fossil Site | Ancient organism remains | 19981001 | National | 464.1 | 0 | 12 | 12 | 10 | 11 | 9 |
| Encheng | Wild animal | 19820608 | National | 258.196 | 13 | 240 | 242 | 220 | 213 | 221 |
| Fanjing Mountain | Forest ecosystem | 19780101 | National | 419 | 21 | 112 | 128 | 114 | 116 | 124 |
| Fangcheng Camellia Reserve | Wild plant | 19860409 | National | 90.986 | 0 | 259 | 274 | 251 | 251 | 247 |
| Fenglin | Forest ecosystem | 19580614 | National | 184 | 2 | 19 | 21 | 20 | 21 | 17 |
| Fengtongzhai | Wild animal | 19750320 | National | 390.39 | 2 | 111 | 115 | 107 | 107 | 117 |
| Fengyangshan–Baishanzu | Forest ecosystem | 19750515 | National | 260.515 | 7 | 127 | 140 | 124 | 130 | 134 |
| Funiu Mountains | Forest ecosystem | 19820624 | National | 560.24 | 57 | 112 | 115 | 108 | 112 | 113 |
| Foding Mountain | Forest ecosystem | 20040520 | National | 152 | 10 | 109 | 119 | 99 | 107 | 108 |
| Foping | Wild animal | 19781215 | National | 292.4 | 5 | 71 | 80 | 60 | 62 | 76 |
| Fujian Emeifeng | Wild plant | 20010609 | National | 102.996 | 1 | 175 | 174 | 169 | 174 | 180 |
| Fujian Wuyi Mountain | Forest ecosystem | 19790703 | National | 565.27 | 20 | 175 | 165 | 169 | 170 | 174 |
| Gahai-Zechac | Wild animal | 19820902 | National | 2474.31 | 3 | 15 | 18 | 14 | 14 | 18 |
| Ganjiahu Saxaul Forest | Desert ecosystem | 19830924 | National | 546.67 | 1 | 17 | 22 | 20 | 18 | 21 |
| Gansu Lianhua Mountain | Forest ecosystem | 19821203 | National | 116.91 | 4 | 35 | 34 | 30 | 24 | 26 |
| Gansu Qilian Mountain | Forest ecosystem | 19871024 | National | 19872 | 20 | 76 | 81 | 81 | 74 | 72 |
| Ganjiangyuan | Forest ecosystem | 19980517 | National | 161.009 | 2 | 189 | 179 | 179 | 185 | 188 |
| Gaogestaihan Ula | Forest ecosystem | 19971127 | National | 1062.84 | 0 | 10 | 12 | 10 | 8 | 13 |
| Gaole Mountain | Forest ecosystem | 20040226 | National | 106.12 | 1 | 129 | 131 | 120 | 126 | 138 |
| Gaoligong Mountain | Forest ecosystem | 19830427 | National | 4052 | 12 | 190 | 188 | 188 | 185 | 181 |
| Gaowangjie | Forest ecosystem | 19930818 | National | 171.698 | 47 | 111 | 125 | 118 | 114 | 124 |
| Gexigou | Wild animal | 19951108 | National | 228.968 | 4 | 30 | 30 | 27 | 35 | 28 |
| Gongbiela River | Inland wetland | 20051018 | National | 479.83 | 0 | 11 | 15 | 8 | 13 | 8 |
| Gongga Mountain | Forest ecosystem | 19960301 | National | 4000 | 15 | 118 | 115 | 118 | 112 | 114 |
| Ancient Coast and Wetlands | Ancient organism remains | 19841230 | National | 359.13 | 2 | 134 | 145 | 141 | 132 | 137 |
| Gujingyuan | Wild plant | 20000318 | National | 79.043 | 1 | 152 | 155 | 148 | 156 | 146 |
| Guniujang | Forest ecosystem | 19820601 | National | 67.133 | 1 | 116 | 131 | 117 | 121 | 125 |
| Gurigestai | Forest ecosystem | 19980602 | National | 989.31 | 0 | 11 | 9 | 8 | 8 | 12 |
| Gutian Mountain | Wild animal | 19750515 | National | 81.08 | 16 | 132 | 138 | 126 | 134 | 139 |
| Guanyin Mountain | Wild animal | 20030617 | National | 135.34 | 0 | 81 | 86 | 70 | 74 | 85 |
| Guanshan | Forest ecosystem | 19810306 | National | 115.005 | 14 | 136 | 148 | 133 | 139 | 138 |
| Guangxi Dayao Mountain | Forest ecosystem | 19820608 | National | 249.073 | 11 | 206 | 212 | 205 | 205 | 212 |
| Haba Lake | Desert ecosystem | 19980725 | National | 840 | 3 | 30 | 32 | 25 | 28 | 29 |
| Hanas | Forest ecosystem | 19800609 | National | 2201.62 | 14 | 23 | 24 | 27 | 25 | 26 |
| Hani | Inland wetland | 19911206 | National | 222.3 | 0 | 43 | 48 | 42 | 44 | 42 |
| Hatengtaohai | Desert ecosystem | 19950101 | National | 1236 | 1 | 18 | 21 | 15 | 17 | 16 |
| Haitang Mountain | Forest ecosystem | 19861201 | National | 110.027 | 2 | 37 | 39 | 28 | 36 | 35 |
| Haizi Mountain | Inland wetland | 19951108 | National | 4591.61 | 0 | 21 | 25 | 18 | 28 | 21 |
| Hancheng Huanglong Mountain Brown Eared Pheasant | Wild animal | 20010825 | National | 377.56 | 1 | 89 | 88 | 84 | 90 | 80 |
| Hanshan | Forest ecosystem | 19961030 | National | 913.33 | 4 | 17 | 17 | 18 | 17 | 18 |
| Hanzhong Crested Ibis | Wild animal | 19830314 | National | 375.49 | 3 | 112 | 116 | 101 | 108 | 104 |
| Hepu Yingpan Port-Yingluo Port Dugong | Wild animal | 19860409 | National | 350 | 0 | 0 | 0 | 0 | 0 | 0 |
| Hebei Wuling Mountain | Forest ecosystem | 19831130 | National | 142.469 | 22 | 78 | 84 | 73 | 80 | 77 |
| Henan Dabie Mountain | Forest ecosystem | 19820624 | National | 106 | 5 | 128 | 131 | 116 | 122 | 125 |
| Henan Yellow River Wetland | Inland wetland | 19950818 | National | 680 | 3 | 150 | 153 | 142 | 153 | 148 |
| Heicha Mountain | Forest ecosystem | 20020620 | National | 244.154 | 3 | 41 | 37 | 29 | 31 | 32 |
| Heili River | Forest ecosystem | 19961231 | National | 276.38 | 2 | 23 | 22 | 24 | 25 | 22 |
| Heilongjiang Grand Canyon | Forest ecosystem | 20101229 | National | 249.98 | 0 | 25 | 30 | 25 | 22 | 19 |
| Heilongjiang Phoenix Mountain | Forest ecosystem | 19890403 | National | 265.7 | 0 | 0 | 0 | 0 | 0 | 0 |
| Heilongjiang Pingding Mountain | Forest ecosystem | 20101229 | National | 202.41 | 0 | 23 | 31 | 23 | 24 | 23 |
| Heilongjiang Shuanghe | Forest ecosystem | 20020910 | National | 888.49 | 0 | 8 | 9 | 8 | 10 | 7 |
| Heixiazi Island | Inland wetland | 20140819 | National | 124.17 | 0 | 0 | 0 | 0 | 0 | 0 |
| Heizhugou | Forest ecosystem | 19970101 | National | 296.43 | 0 | 104 | 106 | 107 | 102 | 109 |
| Hengshui Lake | Inland wetland | 20000701 | National | 163.65 | 1 | 87 | 90 | 83 | 91 | 83 |
| Honghuaerji Mongolian Scots Pine Forest | Forest ecosystem | 19980526 | National | 200.85 | 0 | 9 | 12 | 9 | 8 | 8 |
| Hongjiannao | Inland wetland | 20030606 | National | 107.68 | 1 | 28 | 32 | 21 | 27 | 27 |
| Hongxing Wetland | Inland wetland | 20010801 | National | 1119.95 | 0 | 13 | 14 | 11 | 13 | 10 |
| Hongluo Mountain | Forest ecosystem | 20051223 | National | 100.08 | 0 | 41 | 41 | 40 | 45 | 45 |
| Honghe | Inland wetland | 19840111 | National | 218.35 | 0 | 16 | 18 | 20 | 15 | 17 |
| Hong Lake | Inland wetland | 19960101 | National | 414.12 | 0 | 138 | 150 | 140 | 141 | 157 |
| Hulun Lake | Inland wetland | 19860714 | National | 7400 | 2 | 11 | 16 | 7 | 13 | 10 |
| Huzhong | Forest ecosystem | 19840509 | National | 1672.13 | 5 | 12 | 11 | 12 | 10 | 9 |
| Huping Mountain | Forest ecosystem | 19820403 | National | 665.68 | 11 | 121 | 127 | 121 | 123 | 126 |
| Hunan Shunhuang Mountain | Forest ecosystem | 19820403 | National | 217.198 | 15 | 133 | 142 | 137 | 127 | 134 |
| Huboliao | Forest ecosystem | 19800306 | National | 26.5 | 35 | 265 | 268 | 264 | 263 | 276 |
| Huae Mountain | Forest ecosystem | 19960101 | National | 482.034 | 15 | 95 | 107 | 100 | 105 | 108 |
| Huaping | Forest ecosystem | 19611018 | National | 151.333 | 20 | 184 | 175 | 178 | 173 | 175 |
| Hualong Mountain | Forest ecosystem | 20011120 | National | 281.03 | 1 | 89 | 90 | 83 | 82 | 93 |
| Huagaoxi | Wild plant | 19980112 | National | 238.27 | 9 | 126 | 134 | 114 | 126 | 123 |
| Huanren Laotudingzi | Forest ecosystem | 19810901 | National | 152.19 | 8 | 38 | 45 | 37 | 41 | 39 |
| Huangbaiyuan | Wild animal | 20061230 | National | 218.65 | 9 | 67 | 72 | 58 | 55 | 72 |
| Yellow River Delta | Ocean and seacoast | 19901227 | National | 1530 | 0 | 0 | 0 | 0 | 0 | 0 |
| Yellow River Shouqu Wetland | Inland wetland | 19951123 | National | 2034.01 | 0 | 11 | 13 | 14 | 12 | 13 |
| Huanglian Mountain | Forest ecosystem | 19830427 | National | 618.6 | 21 | 206 | 194 | 184 | 179 | 186 |
| Huangni River | Forest ecosystem | 20000412 | National | 415.83 | 0 | 29 | 36 | 34 | 31 | 27 |
| Huangsang | Forest ecosystem | 19820403 | National | 125.9 | 1 | 113 | 122 | 106 | 110 | 119 |
| Hunchun Siberian Tiger | Wild animal | 20011022 | National | 1087 | 3 | 36 | 36 | 33 | 36 | 31 |
| Hui River | Inland wetland | 19971230 | National | 3468.48 | 0 | 12 | 17 | 11 | 14 | 13 |
| Huize Black-necked Crane Reserve | Wild animal | 19900516 | National | 129.106 | 1 | 109 | 109 | 101 | 91 | 99 |
| Huidong Harbor Sea Turtle Reserve | Wild animal | 19850601 | National | 8 | 2 | 0 | 0 | 0 | 0 | 0 |
| Huoshizhai Danxia Landform Reserve | Geological formation | 20021216 | National | 97.95 | 0 | 34 | 34 | 26 | 26 | 28 |
| Huocheng Four-clawed Turtle Reserve | Wild animal | 19830924 | National | 350 | 8 | 55 | 60 | 56 | 55 | 54 |
| Jigong Mountain | Forest ecosystem | 19820624 | National | 29.17 | 53 | 141 | 146 | 137 | 140 | 149 |
| Ji'an | Wild plant | 19920617 | National | 138.216 | 0 | 50 | 51 | 46 | 47 | 43 |
| Jixian Middle and Upper Proterozoic Stratigraphic Section | Geological formation | 19841018 | National | 9 | 0 | 82 | 98 | 82 | 86 | 81 |
| Jianfengling | Forest ecosystem | 19760616 | National | 201.7 | 46 | 248 | 242 | 231 | 243 | 239 |
| Jiangxi Jiuling Mountain | Forest ecosystem | 19970106 | National | 115.41 | 0 | 120 | 133 | 116 | 121 | 124 |
| Jiangxi Matou Mountain | Forest ecosystem | 19940101 | National | 138.665 | 5 | 133 | 132 | 146 | 135 | 139 |
| Jiangxi Wuyi Mountain | Forest ecosystem | 19810306 | National | 160.07 | 6 | 153 | 148 | 150 | 148 | 156 |
| Jiaozi Mountain | Forest ecosystem | 19940331 | National | 164.56 | 2 | 126 | 120 | 116 | 100 | 108 |
| Jiemu Creek | Forest ecosystem | 19980810 | National | 130.41 | 7 | 123 | 135 | 128 | 130 | 142 |
| Jinfo Mountain | Wild plant | 19790822 | National | 418.5 | 49 | 168 | 175 | 166 | 165 | 169 |
| Jinping Watershed | Forest ecosystem | 19860320 | National | 420.266 | 2 | 221 | 214 | 221 | 211 | 216 |
| Jintong Mountain | Forest ecosystem | 19810126 | National | 184.66 | 0 | 109 | 116 | 107 | 107 | 115 |
| Jinzai Tianma | Forest ecosystem | 19820601 | National | 289.137 | 9 | 133 | 138 | 130 | 133 | 132 |
| Jinzhong Mountain Black-necked Long-tailed Pheasant | Wild animal | 19820608 | National | 209.244 | 21 | 162 | 159 | 148 | 139 | 154 |
| Jinyun Mountain | Forest ecosystem | 19790421 | National | 76 | 47 | 0 | 0 | 0 | 0 | 0 |
| Jinggang Mountain | Forest ecosystem | 19810306 | National | 214.99 | 24 | 137 | 140 | 146 | 144 | 138 |
| Jingyu | Geological formation | 20021129 | National | 150.38 | 0 | 30 | 39 | 30 | 30 | 30 |
| Jiuduansha Wetland | Inland wetland | 20000306 | National | 420.2 | 0 | 0 | 0 | 0 | 0 | 0 |
| Jiugong Mountain | Forest ecosystem | 19811227 | National | 166.087 | 7 | 132 | 141 | 130 | 136 | 134 |
| Jiulian Mountain | Forest ecosystem | 19810306 | National | 134.116 | 5 | 206 | 204 | 197 | 200 | 198 |
| Jiuwan Mountain | Forest ecosystem | 19820608 | National | 252.128 | 15 | 177 | 179 | 173 | 176 | 177 |
| Jiuyi Mountain | Forest ecosystem | 19820403 | National | 102.36 | 1 | 146 | 148 | 143 | 160 | 143 |
| Jiuzhaigou | Wild animal | 19781215 | National | 642.97 | 16 | 33 | 34 | 30 | 36 | 34 |
| Junzi Peak | Forest ecosystem | 19951220 | National | 180.605 | 17 | 203 | 201 | 195 | 198 | 201 |
| Horqin | Wild animal | 19850209 | National | 1195.87 | 0 | 17 | 20 | 14 | 15 | 14 |
| Hoh Xil | Wild animal | 19951005 | National | 45000 | 1 | 10 | 12 | 10 | 12 | 7 |
| Kuankuoshui | Forest ecosystem | 19891230 | National | 262.31 | 11 | 125 | 140 | 123 | 121 | 127 |
| Kunyu Mountain | Forest ecosystem | 19990301 | National | 154.165 | 11 | 118 | 125 | 124 | 119 | 123 |
| Lalu Wetland | Inland wetland | 19990525 | National | 12.2 | 1 | 0 | 0 | 0 | 0 | 0 |
| Langxiang | Forest ecosystem | 20040721 | National | 313.55 | 0 | 20 | 30 | 23 | 19 | 18 |
| Laojun Mountain | Wild animal | 20000229 | National | 35 | 0 | 0 | 0 | 0 | 0 | 0 |
| Laoxiancheng | Wild animal | 19930710 | National | 126.11 | 0 | 69 | 79 | 64 | 60 | 76 |
| Laoyeling Siberian Tiger Reserve | Wild animal | 20111223 | National | 712.78 | 0 | 26 | 27 | 28 | 29 | 27 |
| Leigong Mountain | Forest ecosystem | 19820612 | National | 473 | 10 | 135 | 143 | 120 | 127 | 128 |
| Leizhou Rare Marine Life Reserve | Wild animal | 19830407 | National | 468.647 | 0 | 0 | 0 | 0 | 0 | 0 |
| Leiwuqi Red Deer Reserve | Wild animal | 19930716 | National | 1206.15 | 0 | 8 | 14 | 11 | 17 | 12 |
| Lishan | Forest ecosystem | 19831226 | National | 248 | 8 | 71 | 72 | 62 | 72 | 66 |
| Liziping | Wild animal | 20010924 | National | 479.4 | 3 | 115 | 119 | 124 | 117 | 124 |
| Liancheng | Forest ecosystem | 20010413 | National | 479.3 | 2 | 27 | 28 | 25 | 32 | 33 |
| Liankang Mountain | Forest ecosystem | 19820624 | National | 105.8 | 25 | 147 | 148 | 145 | 143 | 156 |
| Liangshui | Forest ecosystem | 19800707 | National | 121.33 | 0 | 16 | 23 | 15 | 18 | 15 |
| Liangye Mountain | Forest ecosystem | 19950101 | National | 143.65 | 4 | 229 | 239 | 232 | 233 | 234 |
| Liaohekou | Wild animal | 19850909 | National | 800 | 0 | 100 | 106 | 108 | 101 | 105 |
| Liaoning Louzi Mountain | Forest ecosystem | 20001201 | National | 111.5 | 1 | 23 | 25 | 21 | 22 | 24 |
| Liaoning Xianren Cave | Forest ecosystem | 19810901 | National | 35.747 | 2 | 0 | 0 | 0 | 0 | 0 |
| Lin'an Qingliang Peak | Forest ecosystem | 19850807 | National | 108 | 17 | 153 | 160 | 150 | 160 | 161 |
| Lingkong Mountain | Forest ecosystem | 19930120 | National | 101.168 | 3 | 34 | 36 | 31 | 34 | 29 |
| Lingwu Baijitan | Desert ecosystem | 19850101 | National | 709.21 | 1 | 48 | 51 | 40 | 46 | 51 |
| Lingfeng | Forest ecosystem | 20020910 | National | 683.73 | 0 | 9 | 10 | 12 | 8 | 8 |
| Liujiang Basin Geological Relics | Geological formation | 19990514 | National | 13.95 | 0 | 79 | 85 | 72 | 70 | 69 |
| Liubu Creek | Forest ecosystem | 19990510 | National | 142.39 | 0 | 130 | 140 | 127 | 127 | 139 |
| Liupan Mountain | Forest ecosystem | 19820701 | National | 267.84 | 5 | 45 | 51 | 39 | 44 | 42 |
| Longgan Lake | Inland wetland | 19880101 | National | 223.22 | 0 | 178 | 176 | 178 | 174 | 181 |
| Longqi Mountain | Forest ecosystem | 19840911 | National | 156.93 | 23 | 166 | 172 | 170 | 170 | 170 |
| Longwan | Inland wetland | 19910820 | National | 150.61 | 0 | 29 | 37 | 33 | 29 | 33 |
| Longxi-Hongkou | Forest ecosystem | 19930424 | National | 310 | 7 | 191 | 196 | 191 | 177 | 191 |
| Longbao | Wild animal | 19840801 | National | 100 | 0 | 6 | 7 | 6 | 7 | 7 |
| Luyashan | Wild animal | 19801218 | National | 214.53 | 6 | 23 | 25 | 21 | 20 | 22 |
| Lushan | Forest ecosystem | 19810306 | National | 201.2 | 87 | 224 | 213 | 226 | 218 | 217 |
| Luan River Upper Reaches | Forest ecosystem | 20020626 | National | 506.374 | 0 | 21 | 22 | 19 | 21 | 20 |
| Lop Nur Wild Camel | Wild animal | 19860909 | National | 61200 | 1 | 16 | 19 | 13 | 13 | 13 |
| Luokeng Crocodile Lizard | Wild animal | 19780101 | National | 188.136 | 1 | 219 | 217 | 212 | 225 | 225 |
| Mayang River | Wild animal | 19870926 | National | 311.13 | 2 | 123 | 135 | 121 | 123 | 135 |
| Mabian Dafengding | Wild animal | 19781215 | National | 301.64 | 0 | 120 | 125 | 120 | 114 | 118 |
| Mashan | Geological formation | 19930113 | National | 7.74 | 2 | 133 | 139 | 132 | 134 | 131 |
| Mapam Yumco Wetland | Inland wetland | 20081119 | National | 1011.9 | 0 | 16 | 23 | 15 | 21 | 19 |
| Maidika Wetland | Inland wetland | 20030601 | National | 880.524 | 0 | 4 | 7 | 7 | 6 | 7 |
| Mangkam Yunnan Snub-nosed Monkey Reserve | Wild animal | 19930716 | National | 1853 | 0 | 32 | 37 | 25 | 42 | 34 |
| Mangdang Mountain | Forest ecosystem | 19870201 | National | 94.423 | 12 | 252 | 251 | 246 | 256 | 255 |
| Mang Mountain | Forest ecosystem | 19820403 | National | 198.33 | 24 | 0 | 0 | 0 | 0 | 0 |
| Mao'er Mountain | Forest ecosystem | 19760510 | National | 170.085 | 23 | 165 | 164 | 164 | 168 | 166 |
| Maojingba | Forest ecosystem | 20020529 | National | 400.38 | 2 | 24 | 21 | 22 | 21 | 21 |
| Maolangou | Forest ecosystem | 19991228 | National | 358.68 | 0 | 15 | 16 | 10 | 13 | 9 |
| Maolan | Forest ecosystem | 19840101 | National | 200 | 41 | 174 | 178 | 162 | 168 | 176 |
| Meihua Mountain | Forest ecosystem | 19850402 | National | 221.68 | 9 | 247 | 248 | 242 | 245 | 242 |
| Meigu Dafengding | Wild animal | 19781215 | National | 506.55 | 1 | 113 | 111 | 112 | 107 | 113 |
| Micang Mountain | Forest ecosystem | 19990106 | National | 234 | 0 | 78 | 87 | 81 | 82 | 90 |
| Minqin Liangucheng | Desert ecosystem | 19821119 | National | 3898.83 | 1 | 15 | 11 | 11 | 12 | 9 |
| Minjiang Estuary Wetland | Inland wetland | 20030820 | National | 21 | 0 | 0 | 0 | 0 | 0 | 0 |
| Minjiangyuan | Forest ecosystem | 20000315 | National | 130.22 | 0 | 164 | 160 | 164 | 161 | 168 |
| Mingshui | Inland wetland | 20070608 | National | 308.4 | 0 | 21 | 24 | 19 | 19 | 21 |
| Momoge | Inland wetland | 19810320 | National | 1440 | 0 | 23 | 28 | 19 | 22 | 24 |
| Mudan Peak | Forest ecosystem | 19810505 | National | 194.68 | 0 | 31 | 36 | 27 | 28 | 26 |
| Mulinzi | Forest ecosystem | 19830402 | National | 208.38 | 11 | 88 | 93 | 92 | 90 | 105 |
| Mulun | Forest ecosystem | 19910622 | National | 89.69 | 16 | 174 | 185 | 168 | 165 | 173 |
| Muling Northeast Yew Reserve | Wild plant | 20040701 | National | 356.48 | 0 | 27 | 27 | 27 | 24 | 20 |
| Naban River Basin | Forest ecosystem | 19910705 | National | 266 | 13 | 207 | 203 | 194 | 192 | 200 |
| Nanfengmian | Forest ecosystem | 20020125 | National | 105.88 | 1 | 118 | 134 | 140 | 136 | 121 |
| Nangunhe | Wild animal | 19800316 | National | 508.87 | 7 | 166 | 179 | 164 | 171 | 170 |
| Nanhe | Forest ecosystem | 20030928 | National | 148.337 | 0 | 98 | 110 | 95 | 103 | 113 |
| Nanhua Mountain | Forest ecosystem | 19930101 | National | 201.005 | 2 | 18 | 25 | 16 | 21 | 19 |
| Nanji Islands | Ocean and seacoast | 19890110 | National | 196 | 5 | 0 | 0 | 0 | 0 | 0 |
| Nanling | Forest ecosystem | 19840429 | National | 500 | 24 | 228 | 210 | 224 | 224 | 221 |
| Nanmoqie Wetland | Inland wetland | 20020901 | National | 828.34 | 0 | 20 | 16 | 17 | 21 | 14 |
| Nanpeng Islands | Ocean and seacoast | 20030619 | National | 356.79 | 6 | 0 | 0 | 0 | 0 | 0 |
| Nanweng River | Inland wetland | 19991215 | National | 2295.23 | 0 | 12 | 10 | 11 | 10 | 8 |
| Nanyang Dinosaur Egg Fossil Group Reserve | Ancient organism remains | 19980101 | National | 780.15 | 12 | 151 | 155 | 143 | 147 | 154 |
| Nanyue Heng Mountain | Forest ecosystem | 19840509 | National | 119.916 | 33 | 206 | 202 | 217 | 200 | 209 |
| Naoli River | Inland wetland | 19981204 | National | 1605.95 | 0 | 21 | 24 | 25 | 18 | 23 |
| Neilingding Island-Futian | Ocean and seacoast | 19840429 | National | 8.15 | 5 | 0 | 0 | 0 | 0 | 0 |
| Inner Mongolia Dahei Mountain | Forest ecosystem | 19961022 | National | 867.994 | 0 | 31 | 32 | 27 | 28 | 25 |
| Inner Mongolia Daqing Mountain | Forest ecosystem | 19961216 | National | 3885.77 | 9 | 114 | 120 | 116 | 108 | 121 |
| Inner Mongolia Helan Mountain | Forest ecosystem | 19920513 | National | 677.106 | 5 | 56 | 66 | 50 | 56 | 54 |
| Inner Mongolia Qing Mountain | Forest ecosystem | 19971230 | National | 269.89 | 0 | 22 | 25 | 18 | 20 | 17 |
| Nihewan | Geological formation | 19970218 | National | 10.15 | 0 | 41 | 42 | 29 | 36 | 39 |
| Ningxia Helan Mountain | Forest ecosystem | 19820701 | National | 1935.36 | 10 | 75 | 84 | 76 | 77 | 79 |
| Ningxia Luo Mountain | Forest ecosystem | 19820701 | National | 337.1 | 3 | 22 | 20 | 18 | 20 | 20 |
| Niubeiliang | Wild animal | 19801001 | National | 164.18 | 1 | 96 | 107 | 91 | 90 | 104 |
| Nonggang | Forest ecosystem | 19790523 | National | 100.775 | 3 | 267 | 261 | 248 | 244 | 246 |
| Nurul Tiger Mountain | Forest ecosystem | 20001101 | National | 167.056 | 0 | 23 | 23 | 20 | 21 | 21 |
| Panzhihua Cycad Reserve | Wild plant | 19830314 | National | 14 | 1 | 170 | 171 | 164 | 163 | 148 |
| Panzhong | Forest ecosystem | 20060125 | National | 550.74 | 0 | 9 | 11 | 10 | 12 | 8 |
| Pangquangou | Wild animal | 19801218 | National | 104.66 | 24 | 43 | 36 | 33 | 36 | 37 |
| Pingheliang | Wild animal | 20061230 | National | 211.52 | 2 | 88 | 99 | 84 | 93 | 93 |
| Poyang Lake Migratory Bird Reserve | Wild animal | 19830101 | National | 224 | 0 | 175 | 178 | 182 | 181 | 179 |
| Poyang Lake Nanji Wetland | Inland wetland | 19970106 | National | 333 | 0 | 161 | 171 | 168 | 168 | 167 |
| Qichong | Forest ecosystem | 20031121 | National | 143.363 | 5 | 181 | 176 | 175 | 178 | 175 |
| Qixinglazi Siberian Tiger Reserve | Wild animal | 19800101 | National | 557.4 | 0 | 34 | 38 | 32 | 32 | 35 |
| Qizimei Mountain | Forest ecosystem | 19900228 | National | 345.5 | 16 | 107 | 115 | 115 | 112 | 128 |
| Qiyun Mountain | Forest ecosystem | 19970920 | National | 171.05 | 0 | 144 | 148 | 158 | 151 | 142 |
| Qianfo Mountain | Wild animal | 19930828 | National | 110.83 | 0 | 102 | 101 | 90 | 97 | 96 |
| Qianjia Cave | Forest ecosystem | 19820608 | National | 122.31 | 1 | 135 | 137 | 147 | 146 | 133 |
| Qiangtang | Desert ecosystem | 19930716 | National | 298000 | 0 | 8 | 12 | 9 | 9 | 8 |
| Qinghai Lake | Wild animal | 19750821 | National | 4952 | 3 | 20 | 22 | 17 | 21 | 18 |
| Qinglong River | Forest ecosystem | 20010411 | National | 120.45 | 0 | 36 | 31 | 31 | 38 | 32 |
| Qinglong Mountain Dinosaur Egg Fossil Site | Ancient organism remains | 19970113 | National | 2.0525 | 0 | 0 | 0 | 0 | 0 | 0 |
| Qingmuchuan | Wild animal | 20030521 | National | 102 | 2 | 61 | 65 | 59 | 52 | 59 |
| Qingyazhai | Forest ecosystem | 20060201 | National | 151.64 | 2 | 75 | 79 | 67 | 75 | 67 |
| Raohe Northeast Black Bee | Wild animal | 19800508 | National | 2700 | 13 | 29 | 32 | 32 | 29 | 30 |
| Rongcheng Whooper Swan | Wild animal | 19821201 | National | 16.75 | 0 | 0 | 0 | 0 | 0 | 0 |
| Ruoergai Wetland | Inland wetland | 19941118 | National | 1665.71 | 0 | 12 | 17 | 17 | 14 | 18 |
| Saihanba | Forest ecosystem | 20021010 | National | 200.298 | 6 | 14 | 14 | 13 | 13 | 10 |
| Saihanwula | Forest ecosystem | 19970410 | National | 1004 | 3 | 14 | 17 | 15 | 12 | 13 |
| Saiwudang | Forest ecosystem | 19870106 | National | 212.03 | 1 | 98 | 95 | 90 | 99 | 94 |
| Sanhuanpao | Inland wetland | 19910701 | National | 276.87 | 0 | 0 | 0 | 0 | 0 | 0 |
| Sanjiang | Inland wetland | 19940919 | National | 1980.89 | 1 | 18 | 22 | 22 | 18 | 20 |
| Sanjiangyuan | Inland wetland | 20000523 | National | 395000 | 8 | 19 | 19 | 18 | 26 | 18 |
| Sanya Coral Reef | Ocean and seacoast | 19900930 | National | 85 | 45 | 0 | 0 | 0 | 0 | 0 |
| Sangyuan | Wild animal | 20020826 | National | 138.06 | 0 | 61 | 68 | 59 | 53 | 63 |
| Selincuo | Wild animal | 19930716 | National | 20323.8 | 1 | 13 | 15 | 11 | 17 | 11 |
| Shapotou | Desert ecosystem | 19840901 | National | 140.431 | 5 | 25 | 23 | 17 | 23 | 19 |
| Xiamen Rare Marine Species Reserve | Ocean and seacoast | 19910101 | National | 330.88 | 2 | 0 | 0 | 0 | 0 | 0 |
| Shankou Mangrove Reserve | Ocean and seacoast | 19900930 | National | 80 | 0 | 275 | 277 | 262 | 270 | 258 |
| Shanwang Paleontological Fossil Reserve | Ancient organism remains | 19800117 | National | 1.2 | 0 | 114 | 119 | 106 | 121 | 113 |
| Shaanxi Micang Mountain | Forest ecosystem | 20020826 | National | 341.92 | 2 | 89 | 99 | 94 | 95 | 97 |
| Shaanxi Motianling | Wild animal | 20030617 | National | 85.2 | 0 | 76 | 81 | 75 | 68 | 76 |
| Shaanxi Ziwuling | Forest ecosystem | 19990209 | National | 406.21 | 0 | 49 | 45 | 36 | 44 | 37 |
| Snake Island and Laotieshan | Wild animal | 19800806 | National | 90.72 | 9 | 0 | 0 | 0 | 0 | 0 |
| Shenhu Bay Submarine Ancient Forest Site | Ancient organism remains | 19911009 | National | 31 | 0 | 0 | 0 | 0 | 0 | 0 |
| Shennongjia | Forest ecosystem | 19820301 | National | 704.67 | 40 | 120 | 114 | 117 | 120 | 126 |
| Shengjin Lake | Wild animal | 19860204 | National | 334 | 3 | 162 | 167 | 165 | 171 | 173 |
| Sheng Mountain | Forest ecosystem | 20030211 | National | 600 | 0 | 15 | 13 | 10 | 15 | 11 |
| Shibali Long Gorge | Wild plant | 19881020 | National | 256.05 | 1 | 88 | 92 | 81 | 87 | 96 |
| Shiwan Mountain | Forest ecosystem | 19820608 | National | 582.771 | 19 | 269 | 280 | 268 | 275 | 276 |
| Shimentai | Forest ecosystem | 19981228 | National | 335.55 | 1 | 218 | 222 | 210 | 209 | 216 |
| Shishou Elk Reserve | Wild animal | 19911118 | National | 15.67 | 0 | 118 | 129 | 123 | 112 | 128 |
| Siping-Shanmen Mesozoic Volcanic Site | Geological formation | 20000918 | National | 10.62 | 0 | 86 | 80 | 80 | 82 | 81 |
| Sihong Hongze Lake Wetland | Inland wetland | 19850701 | National | 493.65 | 3 | 122 | 133 | 114 | 124 | 123 |
| Three Lakes of the Songhua River | Forest ecosystem | 19820101 | National | 1152.53 | 4 | 39 | 43 | 43 | 40 | 38 |
| Tarim Poplar Forest | Desert ecosystem | 19831008 | National | 3954.2 | 6 | 8 | 10 | 9 | 8 | 8 |
| Taibai Mountain | Forest ecosystem | 19650908 | National | 563.25 | 18 | 100 | 100 | 92 | 95 | 88 |
| Takuan River | Forest ecosystem | 20020620 | National | 242.767 | 5 | 72 | 69 | 65 | 71 | 63 |
| Taipinggou | Forest ecosystem | 20091230 | National | 221.99 | 0 | 0 | 0 | 0 | 0 | 0 |
| Taitong–Kongtong Mountain | Forest ecosystem | 19821119 | National | 162.83 | 12 | 60 | 61 | 49 | 55 | 54 |
| Taihang Mountain Macaque Reserve | Wild animal | 19820624 | National | 566 | 34 | 145 | 151 | 137 | 148 | 144 |
| Taizi Mountain | Forest ecosystem | 20051228 | National | 847 | 0 | 46 | 47 | 38 | 38 | 43 |
| Tangjiahe | Wild animal | 19781215 | National | 400 | 2 | 66 | 72 | 67 | 54 | 65 |
| Tao River | Forest ecosystem | 20050202 | National | 2877.59 | 2 | 28 | 30 | 26 | 26 | 28 |
| Taohong Ridge Sika Deer Reserve | Wild animal | 19810306 | National | 125 | 15 | 140 | 146 | 144 | 150 | 144 |
| Tianbao Rock | Forest ecosystem | 19881226 | National | 110.15 | 4 | 197 | 204 | 196 | 201 | 196 |
| Tianfozhi Mountain | Forest ecosystem | 19960322 | National | 773.17 | 0 | 28 | 28 | 32 | 22 | 24 |
| Tianhua Mountain | Wild animal | 20030617 | National | 254.85 | 10 | 78 | 83 | 64 | 67 | 80 |
| Source of Ting River | Forest ecosystem | 20010609 | National | 103.797 | 4 | 188 | 186 | 195 | 195 | 193 |
| Tonghua Shihu | Forest ecosystem | 19930312 | National | 152 | 0 | 38 | 44 | 33 | 35 | 32 |
| Tongbo Mountain | Forest ecosystem | 20040820 | National | 108 | 5 | 141 | 144 | 141 | 137 | 148 |
| Tonggu Ridge | Ocean and seacoast | 19830506 | National | 44 | 32 | 0 | 0 | 0 | 0 | 0 |
| Tongling Yangtze Finless Porpoise Reserve | Wild animal | 19850915 | National | 315.18 | 0 | 192 | 181 | 189 | 183 | 192 |
| Toudao Upper Reaches of Songhua River | Forest ecosystem | 20090101 | National | 133.5 | 0 | 18 | 23 | 21 | 21 | 21 |
| Tumuji | Wild animal | 19960729 | National | 762.1 | 1 | 23 | 32 | 23 | 22 | 21 |
| Tomur Peak | Forest ecosystem | 19800609 | National | 3804.8 | 1 | 14 | 15 | 12 | 18 | 9 |
| Tuoliang | Forest ecosystem | 20010331 | National | 213.119 | 7 | 52 | 54 | 41 | 50 | 43 |
| Wangqing | Forest ecosystem | 20021220 | National | 674.34 | 0 | 31 | 33 | 28 | 27 | 29 |
| Wanglang | Wild animal | 19630402 | National | 322.97 | 2 | 34 | 33 | 31 | 32 | 34 |
| Weining Caohai | Inland wetland | 19850201 | National | 120 | 15 | 0 | 0 | 0 | 0 | 0 |
| Weichang Hongsongwa | Steppe and meadow | 19940815 | National | 79.7 | 0 | 14 | 16 | 16 | 13 | 13 |
| Wenquan Xinjiang Salamander | Wild animal | 19971229 | National | 6.945 | 0 | 0 | 0 | 0 | 0 | 0 |
| Wenshan | Forest ecosystem | 19800605 | National | 268.67 | 10 | 202 | 192 | 187 | 166 | 176 |
| Wolong | Wild animal | 19630402 | National | 2000 | 20 | 159 | 155 | 156 | 156 | 161 |
| Urad Saxaul Forest-Mongolian Wild Ass Reserve | Desert ecosystem | 19851005 | National | 680 | 0 | 7 | 7 | 6 | 7 | 5 |
| Ulanba | Forest ecosystem | 19971101 | National | 786.72 | 2 | 10 | 12 | 11 | 11 | 13 |
| Wuma River Sable Reserve | Wild animal | 20060313 | National | 209.49 | 0 | 13 | 22 | 16 | 18 | 14 |
| Wumeng Mountain | Forest ecosystem | 19840405 | National | 261.867 | 0 | 137 | 139 | 125 | 131 | 131 |
| Wuyanling | Forest ecosystem | 19750515 | National | 188.615 | 7 | 159 | 168 | 162 | 162 | 161 |
| Wuyiling | Inland wetland | 19990101 | National | 438.24 | 1 | 21 | 21 | 20 | 21 | 16 |
| Wuyuer River | Inland wetland | 19920101 | National | 554.23 | 1 | 29 | 36 | 28 | 31 | 31 |
| Wuyunjie | Forest ecosystem | 19980501 | National | 333.396 | 6 | 136 | 147 | 142 | 136 | 143 |
| Wuliang Mountain | Forest ecosystem | 19860320 | National | 309.381 | 3 | 175 | 171 | 164 | 162 | 167 |
| Wudalianchi | Geological formation | 19800329 | National | 1009.77 | 6 | 26 | 29 | 20 | 26 | 24 |
| Wudao Gorge | Forest ecosystem | 19900213 | National | 208.6 | 4 | 91 | 97 | 74 | 88 | 99 |
| Wufeng Houhe | Forest ecosystem | 19850303 | National | 103.4 | 4 | 106 | 113 | 114 | 111 | 121 |
| Wuhua Peak | Forest ecosystem | 20111029 | National | 134.944 | 0 | 57 | 66 | 55 | 59 | 49 |
| Wulipo | Forest ecosystem | 20000929 | National | 352.766 | 1 | 105 | 107 | 94 | 96 | 106 |
| Wulu Mountain | Wild animal | 19930120 | National | 206.173 | 2 | 35 | 33 | 28 | 36 | 29 |
| Wuzhishan | Forest ecosystem | 19851119 | National | 134.359 | 32 | 240 | 236 | 226 | 236 | 231 |
| Wuyuan Forest Bird Reserve | Wild animal | 19931206 | National | 129.927 | 2 | 123 | 131 | 122 | 117 | 129 |
| Tibet Yarlung Zangbo River Mid-Reach Valley Black-Necked Crane Reserve | Wild animal | 19930716 | National | 6143.5 | 3 | 38 | 43 | 39 | 46 | 36 |
| West Dongting Lake | Inland wetland | 19980114 | National | 300.44 | 0 | 157 | 167 | 162 | 163 | 170 |
| West Ordos | Wild plant | 19861201 | National | 4600.24 | 1 | 69 | 79 | 68 | 69 | 72 |
| Xishuangbanna | Forest ecosystem | 19581009 | National | 2417.76 | 35 | 239 | 244 | 229 | 215 | 227 |
| Western Tianshan | Forest ecosystem | 19831008 | National | 312.17 | 0 | 17 | 22 | 24 | 19 | 22 |
| Xilin Gol Grassland | Steppe and meadow | 19850805 | National | 5800 | 9 | 17 | 21 | 23 | 19 | 18 |
| Xishui Central Subtropical Evergreen Broad-leaved Forest | Forest ecosystem | 19920301 | National | 486.66 | 4 | 143 | 150 | 138 | 141 | 150 |
| Xilin River | Forest ecosystem | 20040902 | National | 215.7 | 0 | 34 | 41 | 34 | 35 | 34 |
| Xiandongshan Sika Deer | Wild animal | 20090407 | National | 24.5 | 0 | 17 | 21 | 16 | 22 | 19 |
| Xianghai | Inland wetland | 19810320 | National | 1054.67 | 1 | 18 | 22 | 18 | 16 | 12 |
| Xiangshan Jue Mountain Islands | Ocean and seacoast | 20030418 | National | 484.78 | 0 | 0 | 0 | 0 | 0 | 0 |
| Xiangtou Mountain | Forest ecosystem | 19981228 | National | 106.969 | 4 | 309 | 312 | 306 | 298 | 309 |
| Xiaobeihu | Forest ecosystem | 20061226 | National | 208.34 | 0 | 21 | 31 | 24 | 20 | 19 |
| Xiaojin Mount Siguniang | Wild animal | 19950301 | National | 560 | 8 | 71 | 66 | 70 | 70 | 71 |
| Xiaolong Mountain | Forest ecosystem | 19821119 | National | 319.38 | 2 | 67 | 75 | 72 | 61 | 73 |
| Xiaoqinling | Forest ecosystem | 19820624 | National | 151.6 | 15 | 100 | 98 | 93 | 94 | 90 |
| Mount Xiaowutai | Forest ecosystem | 19831130 | National | 267 | 20 | 65 | 79 | 61 | 65 | 62 |
| Xiaoxi | Forest ecosystem | 19820101 | National | 248 | 21 | 117 | 130 | 124 | 123 | 132 |
| Fraxinus sogdiana Reserve | Wild plant | 19831008 | National | 91.0347 | 0 | 37 | 36 | 37 | 34 | 36 |
| Xiaozhaizigou | Wild animal | 19790501 | National | 443.847 | 1 | 72 | 75 | 68 | 69 | 78 |
| Xinqing Siberian Crane Reserve | Wild animal | 20040427 | National | 625.67 | 0 | 16 | 15 | 16 | 14 | 11 |
| Xinxiang Bird Species Reserve of the Yellow River Wetland | Inland wetland | 19880727 | National | 227.8 | 1 | 150 | 157 | 144 | 147 | 142 |
| Xingdou Mountain | Wild plant | 19811218 | National | 683.39 | 22 | 139 | 150 | 149 | 149 | 149 |
| Xingkai Lake | Inland wetland | 19860405 | National | 2224.88 | 5 | 24 | 23 | 26 | 23 | 25 |
| Xinglong Mountain | Forest ecosystem | 19821119 | National | 333.01 | 14 | 79 | 83 | 76 | 82 | 85 |
| Xiongjiang Huangzhulin | Forest ecosystem | 19850802 | National | 125.133 | 0 | 258 | 256 | 253 | 261 | 252 |
| Xuwen Coral Reef | Ocean and seacoast | 19990803 | National | 143.785 | 0 | 0 | 0 | 0 | 0 | 0 |
| Xuebaoding | Wild animal | 19930828 | National | 636.15 | 1 | 61 | 59 | 51 | 53 | 57 |
| Xuebaoshan | Forest ecosystem | 20000501 | National | 234.52 | 10 | 96 | 101 | 92 | 97 | 110 |
| Xunhua Mengda | Forest ecosystem | 19800403 | National | 172.9 | 2 | 26 | 25 | 24 | 24 | 28 |
| Upper Yalu River | Wild animal | 19961001 | National | 203.06 | 0 | 19 | 19 | 20 | 16 | 20 |
| Yarlung Zangbo Grand Canyon | Forest ecosystem | 19850923 | National | 9168 | 26 | 93 | 107 | 97 | 108 | 120 |
| Orchidaceae Reserve of Yachang | Wild plant | 20050422 | National | 220.62 | 2 | 174 | 176 | 159 | 161 | 169 |
| Yading | Forest ecosystem | 19960320 | National | 1457.5 | 5 | 48 | 49 | 40 | 45 | 38 |
| Yan'an Brown-eared Pheasant of Huanglong Mountain | Wild animal | 20011218 | National | 817.53 | 2 | 63 | 56 | 57 | 63 | 53 |
| Yanling Taoyuandong | Forest ecosystem | 19820403 | National | 237.86 | 1 | 139 | 149 | 150 | 147 | 148 |
| Rare Bird Reserve of Yancheng Wetland | Wild animal | 19830225 | National | 2472.6 | 5 | 96 | 100 | 93 | 89 | 85 |
| Yanchiwang | Wild animal | 19821119 | National | 13600 | 1 | 10 | 9 | 7 | 8 | 5 |
| Yanming Lake | Inland wetland | 19911120 | National | 550.16 | 0 | 39 | 43 | 40 | 39 | 35 |
| Yangcheng Manghe Rhesus Monkey Reserve | Wild animal | 19831226 | National | 56 | 22 | 99 | 103 | 91 | 99 | 98 |
| Yangjifeng | Wild animal | 19961101 | National | 109.46 | 9 | 146 | 150 | 154 | 139 | 152 |
| Yangming Mountain | Forest ecosystem | 19820403 | National | 127.95 | 2 | 129 | 130 | 136 | 131 | 133 |
| Yaoshan | Forest ecosystem | 19840405 | National | 201.41 | 2 | 103 | 95 | 88 | 81 | 95 |
| Yaoluoping | Forest ecosystem | 19911229 | National | 123 | 10 | 141 | 139 | 134 | 144 | 143 |
| Yitong Volcanic Group | Geological formation | 19830101 | National | 7.648 | 0 | 45 | 54 | 55 | 55 | 50 |
| Yiwulü Mountain | Forest ecosystem | 19810901 | National | 114.59 | 1 | 69 | 82 | 74 | 75 | 66 |
| Yintiao Ridge | Wild plant | 20000810 | National | 224.231 | 0 | 92 | 98 | 91 | 100 | 104 |
| Yinzhu Laoshan | Wild plant | 19820608 | National | 43.412 | 0 | 116 | 133 | 122 | 122 | 122 |
| Yinggeling | Forest ecosystem | 20040723 | National | 504.64 | 13 | 252 | 242 | 231 | 241 | 247 |
| Yingzuijie | Forest ecosystem | 19981027 | National | 159 | 0 | 111 | 131 | 121 | 121 | 127 |
| Yongde Daxueshan | Forest ecosystem | 19860320 | National | 175.41 | 5 | 170 | 170 | 161 | 165 | 163 |
| Yongzhou Dupang Ridge | Forest ecosystem | 19820101 | National | 200.664 | 1 | 157 | 152 | 156 | 157 | 165 |
| Youhao | Inland wetland | 20010901 | National | 606.87 | 0 | 13 | 15 | 11 | 15 | 11 |
| Yuanbao Mountain | Wild plant | 19820608 | National | 42.207 | 3 | 0 | 0 | 0 | 0 | 0 |
| Yuanjiang | Forest ecosystem | 20020513 | National | 223.789 | 1 | 213 | 214 | 209 | 200 | 202 |
| Yuanchi Wetland | Inland wetland | 20131106 | National | 173.77 | 0 | 22 | 28 | 24 | 22 | 22 |
| Yunkai Mountain | Forest ecosystem | 19940412 | National | 125.113 | 7 | 250 | 256 | 249 | 245 | 254 |
| Yunlong Tianchi | Forest ecosystem | 19830427 | National | 144.75 | 2 | 137 | 123 | 124 | 119 | 119 |
| Yunnan Mount Daweishan | Forest ecosystem | 19860320 | National | 439.926 | 12 | 243 | 237 | 243 | 235 | 242 |
| Yunwu Mountain | Steppe and meadow | 19820403 | National | 66.6 | 2 | 23 | 30 | 22 | 24 | 24 |
| Zengfeng Ridge | Forest ecosystem | 20130101 | National | 173.86 | 0 | 24 | 26 | 23 | 20 | 26 |
| Zhalong | Wild animal | 19870418 | National | 2100 | 2 | 32 | 44 | 38 | 39 | 33 |
| Zhanjiang Mangrove Reserve | Ocean and seacoast | 19900111 | National | 193 | 0 | 233 | 229 | 217 | 227 | 216 |
| Zhangjiajie Chinese Giant Salamander Reserve | Wild animal | 19950418 | National | 142.85 | 13 | 157 | 167 | 164 | 165 | 177 |
| Zhangye Heihe Wetland | Inland wetland | 19921210 | National | 411.646 | 0 | 24 | 29 | 21 | 25 | 17 |
| Zhanggutai | Forest ecosystem | 19861201 | National | 102 | 0 | 39 | 44 | 40 | 38 | 36 |
| Zhangjiangkou Mangrove Reserve | Ocean and seacoast | 19920701 | National | 23.6 | 14 | 0 | 0 | 0 | 0 | 0 |
| Changbai Mountain | Forest ecosystem | 19600418 | National | 1964.65 | 9 | 30 | 38 | 31 | 30 | 32 |
| Changdao | Wild animal | 19820315 | National | 53 | 1 | 0 | 0 | 0 | 0 | 0 |
| Yangtze River Swan Islet Baiji Dolphin Reserve | Wild animal | 19901201 | National | 20 | 0 | 0 | 0 | 0 | 0 | 0 |
| Yangtze River Xinluo Section Baiji Dolphin Reserve | Wild animal | 19870101 | National | 135 | 1 | 200 | 206 | 199 | 198 | 202 |
| Changning Bamboo Sea | Forest ecosystem | 19961001 | National | 287.19 | 6 | 155 | 162 | 155 | 151 | 154 |
| Changqing | Wild animal | 19941214 | National | 299.06 | 0 | 92 | 97 | 84 | 90 | 90 |
| Changsha Gongma | Wild animal | 19951108 | National | 6698 | 0 | 6 | 9 | 7 | 7 | 7 |
| Geological Heritage of Changxing | Geological formation | 19800314 | National | 2.75 | 0 | 201 | 197 | 196 | 193 | 199 |
| Changyang Bengjianzi | Forest ecosystem | 19880101 | National | 133.13 | 0 | 114 | 128 | 123 | 115 | 128 |
| Zhejiang Jiulong Mountain | Forest ecosystem | 19830903 | National | 55.25 | 8 | 117 | 124 | 114 | 116 | 128 |
| Zhejiang Mount Tianmu | Wild plant | 19750515 | National | 42.84 | 71 | 0 | 0 | 0 | 0 | 0 |
| Zhenbao Island Wetland | Inland wetland | 20020415 | National | 443.64 | 1 | 0 | 0 | 0 | 0 | 0 |
| Central Station Black-billed Capercaillie | Wild animal | 20061226 | National | 467.43 | 0 | 11 | 14 | 8 | 10 | 9 |
| Zhouzhi | Wild animal | 19840101 | National | 563.93 | 2 | 94 | 101 | 89 | 90 | 95 |
| Pearl River Estuary Chinese White Dolphin | Wild animal | 19991013 | National | 460 | 0 | 0 | 0 | 0 | 0 | 0 |
| Mount Everest | Forest ecosystem | 19880405 | National | 33810 | 17 | 27 | 35 | 26 | 36 | 43 |
| Zibai Mountain | Wild animal | 20020903 | National | 174.72 | 4 | 73 | 80 | 73 | 68 | 73 |
| Bajie Giant Cypress | Wild plant | 19850101 | Provincial | 0.08 | 2 | 20 | 24 | 15 | 35 | 27 |
| Liujing Devonian Geology | Geological formation | 19830406 | Provincial | 0.209919 | 0 | 0 | 0 | 0 | 0 | 0 |
| Beiliu Dafengmen Devonian Geology | Geological formation | 19830406 | Provincial | 0.217694 | 0 | 0 | 0 | 0 | 0 | 0 |
| Golden Spike Geological Heritage | Geological formation | 20150609 | Provincial | 0.2287 | 0 | 0 | 0 | 0 | 0 | 0 |
| Nanbiancun Geological Section | Geological formation | 19890810 | Provincial | 0.234287 | 0 | 0 | 0 | 0 | 0 | 0 |
| East Qinling Geological Section | Geological formation | 19901101 | Provincial | 0.25 | 1 | 0 | 0 | 0 | 0 | 0 |
| Luofu Devonian Section | Geological formation | 19830406 | Provincial | 0.334535 | 0 | 220 | 215 | 213 | 223 | 230 |
| Shanghuang Shuimushan | Ancient organism remains | 19981113 | Provincial | 0.4 | 0 | 23 | 22 | 17 | 23 | 19 |
| Siziwang Banner Mammal Fossils | Ancient organism remains | 19970501 | Provincial | 0.476 | 0 | 109 | 125 | 105 | 111 | 115 |
| Menglian Longshan | Wild plant | 19860320 | Provincial | 0.54 | 0 | 195 | 189 | 187 | 197 | 188 |
| Meishucun Section | Geological formation | 19890306 | Provincial | 0.58 | 0 | 0 | 0 | 0 | 0 | 0 |
| Guangfu | Forest ecosystem | 19810812 | Provincial | 0.6067 | 0 | 0 | 0 | 0 | 0 | 0 |
| Yuntai Mountain Forest | Forest ecosystem | 19810812 | Provincial | 0.67 | 0 | 0 | 0 | 0 | 0 | 0 |
| Wujiang–Changxi River Fish Reserve | Wild animal | 20070213 | Provincial | 0.83 | 0 | 0 | 0 | 0 | 0 | 0 |
| Yidao | Geological formation | 20080901 | Provincial | 0.8549 | 0 | 0 | 0 | 0 | 0 | 0 |
| Dale Devonian | Geological formation | 19830406 | Provincial | 1.09511 | 3 | 0 | 0 | 0 | 0 | 0 |
| Cyathea spinulosa of Jinhua | Wild plant | 19861023 | Provincial | 1.1 | 0 | 198 | 203 | 195 | 177 | 175 |
| Huaisha River and Huaijiu River | Wild animal | 19961121 | Provincial | 1.112 | 0 | 203 | 201 | 209 | 202 | 202 |
| Korean Pine Reserve | Wild plant | 19850130 | Provincial | 1.12 | 0 | 0 | 0 | 0 | 0 | 0 |
| Ancient Shell Ridge | Ancient organism remains | 19980923 | Provincial | 1.17 | 0 | 120 | 128 | 122 | 119 | 129 |
| Changxing Yangtze Alligator | Wild animal | 19881102 | Provincial | 1.2267 | 0 | 0 | 0 | 0 | 0 | 0 |
| Longchi | Forest ecosystem | 19810812 | Provincial | 1.23 | 0 | 176 | 168 | 169 | 178 | 172 |
| Baohua Mountain | Forest ecosystem | 19810812 | Provincial | 1.33 | 0 | 0 | 0 | 0 | 0 | 0 |
| Dayangcha | Geological formation | 19850901 | Provincial | 1.5 | 0 | 53 | 62 | 50 | 57 | 53 |
| Wanmulin | Forest ecosystem | 19570607 | Provincial | 1.89 | 0 | 23 | 29 | 25 | 21 | 24 |
| Jiangkou Bird Islet | Inland wetland | 19840509 | Provincial | 2.1 | 0 | 0 | 0 | 0 | 0 | 0 |
| Niumulin | Forest ecosystem | 19840729 | Provincial | 2.496 | 0 | 201 | 195 | 188 | 196 | 200 |
| Nan'ao Migratory Bird Reserve | Wild animal | 19900111 | Provincial | 2.565 | 0 | 0 | 0 | 0 | 0 | 0 |
| Sanming Luobuyan | Wild plant | 19830328 | Provincial | 3.4093 | 0 | 199 | 198 | 197 | 193 | 198 |
| Qingtian Yangtian Softshell Turtle | Wild animal | 20001211 | Provincial | 3.6084 | 0 | 42 | 53 | 43 | 47 | 44 |
| Bangxi | Wild animal | 19760616 | Provincial | 3.618 | 3 | 0 | 0 | 0 | 0 | 0 |
| Quanshan | Forest ecosystem | 19841204 | Provincial | 3.7 | 0 | 0 | 0 | 0 | 0 | 0 |
| Chao'an Coastal Erosion Landform | Geological formation | 19991228 | Provincial | 4.05 | 4 | 265 | 261 | 252 | 257 | 247 |
| Qinglong Bay | Forest ecosystem | 20030627 | Provincial | 4.16 | 4 | 0 | 0 | 0 | 0 | 0 |
| Zuojiang Lamprotula mansuyi Reserve | Wild animal | 20050908 | Provincial | 4.174 | 0 | 237 | 232 | 230 | 240 | 242 |
| Longhai Jiulong River Mangrove | Ocean and seacoast | 19880212 | Provincial | 4.202 | 0 | 181 | 179 | 180 | 172 | 186 |
| Fulaishan | Geological formation | 20011129 | Provincial | 4.9 | 0 | 248 | 237 | 233 | 246 | 223 |
| Wuzhishan Archipelago Bird Reserve | Wild animal | 19880523 | Provincial | 5 | 0 | 0 | 0 | 0 | 0 | 0 |
| Renshou Mountain | Forest ecosystem | 19910510 | Provincial | 5.2 | 0 | 0 | 0 | 0 | 0 | 0 |
| Tiemu Mountain | Forest ecosystem | 19920213 | Provincial | 5.22 | 0 | 0 | 0 | 0 | 0 | 0 |
| Qingyang Pantai | Forest ecosystem | 20060417 | Provincial | 5.4 | 0 | 253 | 258 | 243 | 243 | 240 |
| Longquan Lake | Inland wetland | 20000114 | Provincial | 5.52 | 0 | 0 | 0 | 0 | 0 | 0 |
| Laibin Section of Hongshui River | Wild animal | 20050908 | Provincial | 5.82 | 0 | 113 | 117 | 103 | 118 | 116 |
| Diaoling Mountain | Forest ecosystem | 19840405 | Provincial | 6.13 | 0 | 0 | 0 | 0 | 0 | 0 |
| Ganhaizi Migratory Bird Reserve | Wild animal | 19820101 | Provincial | 6.66 | 0 | 0 | 0 | 0 | 0 | 0 |
| Lingyun Cave System | Wild animal | 20080306 | Provincial | 6.84 | 0 | 0 | 0 | 0 | 0 | 0 |
| Jinggangshan Chinese Giant Salamander Reserve | Wild animal | 19930101 | Provincial | 7.0303 | 0 | 0 | 0 | 0 | 0 | 0 |
| Wanjiang River Chinese Giant Salamander Reserve | Wild animal | 19900610 | Provincial | 7.8 | 0 | 0 | 0 | 0 | 0 | 0 |
| Shanhe Forest Frog Reserve | Wild animal | 19830101 | Provincial | 8.7 | 0 | 211 | 204 | 196 | 201 | 192 |
| Huaiji Qiaotou Yanyan Rock | Geological formation | 20050706 | Provincial | 9.23 | 0 | 0 | 0 | 0 | 0 | 0 |
| Wugang Mount Yun | Forest ecosystem | 19820403 | Provincial | 9.52 | 0 | 0 | 0 | 0 | 0 | 0 |
| Huayanxi | Forest ecosystem | 20000121 | Provincial | 9.55 | 3 | 198 | 196 | 176 | 183 | 180 |
| Liji Qingpi Forest | Forest ecosystem | 19800716 | Provincial | 9.9193 | 0 | 0 | 0 | 0 | 0 | 0 |
| Qinghua Green Peafowl Reserve | Wild animal | 19880715 | Provincial | 10 | 26 | 129 | 133 | 136 | 137 | 148 |
| Qinglan Lake | Wild animal | 19970106 | Provincial | 10 | 0 | 30 | 39 | 34 | 30 | 34 |
| Heyuan Dinosaur Fossils | Ancient organism remains | 20011231 | Provincial | 10.02 | 0 | 215 | 207 | 206 | 205 | 200 |
| Anlan Egret Reserve | Wild animal | 19990803 | Provincial | 10.04 | 8 | 0 | 0 | 0 | 0 | 0 |
| Nanwan | Wild animal | 19760616 | Provincial | 10.26 | 0 | 0 | 0 | 0 | 0 | 0 |
| Estuarine Wetland of Huangshui River | Inland wetland | 20060203 | Provincial | 10.279 | 7 | 0 | 0 | 0 | 0 | 0 |
| Rare Plant Reserve of Luotong Mountain | Wild plant | 20100514 | Provincial | 10.33 | 0 | 0 | 0 | 0 | 0 | 0 |
| Jinshan Three Islands Marine Zone | Ocean and seacoast | 19911005 | Provincial | 10.44 | 0 | 197 | 199 | 196 | 192 | 194 |
| Sanming Castanopsis kawakamii | Wild plant | 19580101 | Provincial | 11.057 | 0 | 0 | 0 | 0 | 0 | 0 |
| Guiqing Mountain | Forest ecosystem | 19920213 | Provincial | 11.14 | 0 | 183 | 187 | 183 | 172 | 190 |
| Minxian Aquatic Organism Reserve | Wild animal | 20110512 | Provincial | 11.24 | 1 | 0 | 0 | 0 | 0 | 0 |
| Juma River | Wild animal | 19961121 | Provincial | 11.25 | 0 | 0 | 0 | 0 | 0 | 0 |
| Gongliu Wild Walnut | Wild plant | 19831008 | Provincial | 11.8 | 0 | 0 | 0 | 0 | 0 | 0 |
| Jiangshi | Forest ecosystem | 19860327 | Provincial | 11.8713 | 0 | 0 | 0 | 0 | 0 | 0 |
| Alpine Wetland of Wangdongyang | Inland wetland | 20020204 | Provincial | 11.948 | 0 | 0 | 0 | 0 | 0 | 0 |
| Yujing Mountain Magnolia decidua Reserve | Wild plant | 20070116 | Provincial | 11.99 | 0 | 0 | 0 | 0 | 0 | 0 |
| Dazhai Mountain | Forest ecosystem | 20011031 | Provincial | 12 | 0 | 34 | 38 | 34 | 33 | 37 |
| Shibalian Mountain | Wild plant | 19860320 | Provincial | 12.13 | 8 | 0 | 0 | 0 | 0 | 0 |
| Qujiang Qianligang | Forest ecosystem | 20151218 | Provincial | 12.7588 | 2 | 28 | 25 | 27 | 24 | 26 |
| Thirty-Six-Foot Lake | Geological formation | 19970703 | Provincial | 13.4 | 0 | 168 | 163 | 168 | 169 | 176 |
| Damao Mountain | Forest ecosystem | 20120120 | Provincial | 13.5333 | 0 | 0 | 0 | 0 | 0 | 0 |
| Xiaoshan Volcano | Geological formation | 20030724 | Provincial | 13.81 | 0 | 0 | 0 | 0 | 0 | 0 |
| Dongfang Black-faced Spoonbill Reserve | Wild animal | 20060518 | Provincial | 14.29 | 0 | 114 | 117 | 104 | 125 | 119 |
| Pingtan Mandarin Duck and Macaque Reserve | Wild animal | 19840807 | Provincial | 14.573 | 0 | 199 | 184 | 178 | 168 | 176 |
| Songfeng Mountain | Forest ecosystem | 19840523 | Provincial | 14.65 | 0 | 152 | 159 | 150 | 147 | 152 |
| Yishan | Forest ecosystem | 20010916 | Provincial | 14.852 | 1 | 0 | 0 | 0 | 0 | 0 |
| Liannan Chinese Giant Salamander Reserve | Wild animal | 20000101 | Provincial | 14.934 | 0 | 0 | 0 | 0 | 0 | 0 |
| Liujiaxia Dinosaur Footprints | Ancient organism remains | 20011118 | Provincial | 15 | 0 | 0 | 0 | 0 | 0 | 0 |
| Fu'an Cyathea Reserve | Wild plant | 19970325 | Provincial | 15.0932 | 1 | 0 | 0 | 0 | 0 | 0 |
| Bancang | Forest ecosystem | 19951121 | Provincial | 15.232 | 0 | 144 | 142 | 139 | 151 | 149 |
| Chawan | Forest ecosystem | 20010406 | Provincial | 16 | 0 | 42 | 52 | 54 | 51 | 42 |
| Jianshui Swallow Cave | Wild animal | 20020513 | Provincial | 16.012 | 0 | 115 | 123 | 118 | 116 | 123 |
| Dagong Island | Ocean and seacoast | 20011224 | Provincial | 16.03 | 0 | 0 | 0 | 0 | 0 | 0 |
| Hanshiqiao Wetland | Inland wetland | 20050404 | Provincial | 16.15 | 0 | 57 | 58 | 52 | 62 | 57 |
| Beihai Wetland | Inland wetland | 20000601 | Provincial | 16.2894 | 0 | 230 | 225 | 226 | 225 | 224 |
| Nanhaizi Wetland | Inland wetland | 20001010 | Provincial | 16.64 | 0 | 0 | 0 | 0 | 0 | 0 |
| Chinese Merganser, Yihuang | Wild animal | 20140319 | Provincial | 16.9354 | 4 | 0 | 0 | 0 | 0 | 0 |
| Ganshiling | Wild plant | 19851119 | Provincial | 17.1546 | 0 | 0 | 0 | 0 | 0 | 0 |
| Jungar Geological Remains | Ancient organism remains | 19990630 | Provincial | 17.39 | 0 | 0 | 0 | 0 | 0 | 0 |
| Daqi Mountain | Forest ecosystem | 20020425 | Provincial | 17.459 | 13 | 104 | 117 | 110 | 108 | 97 |
| Qingliu Lianhua Mountain | Forest ecosystem | 20010101 | Provincial | 17.76 | 2 | 158 | 158 | 147 | 148 | 152 |
| Chengjiang Biota Fossil Site | Ancient organism remains | 19970612 | Provincial | 18 | 0 | 0 | 0 | 0 | 0 | 0 |
| Qianliyan Island | Ocean and seacoast | 19991201 | Provincial | 18.23 | 0 | 0 | 0 | 0 | 0 | 0 |
| Laiyang Wulong River | Inland wetland | 20070417 | Provincial | 18.245 | 4 | 0 | 0 | 0 | 0 | 0 |
| Luhe Anguilla Marmorata | Wild animal | 20041203 | Provincial | 18.656 | 0 | 0 | 0 | 0 | 0 | 0 |
| Yangling | Forest ecosystem | 19850101 | Provincial | 18.8 | 0 | 143 | 144 | 137 | 143 | 149 |
| Nankun Mountain | Forest ecosystem | 19840429 | Provincial | 18.87 | 0 | 164 | 172 | 171 | 177 | 170 |
| Daping Mountain | Forest ecosystem | 19820608 | Provincial | 18.965 | 0 | 0 | 0 | 0 | 0 | 0 |
| Xijiang River Rare Fish Reserve | Wild animal | 19920101 | Provincial | 19.14 | 0 | 0 | 0 | 0 | 0 | 0 |
| Shucheng Wanfo Mountain | Forest ecosystem | 19870801 | Provincial | 19.36 | 0 | 110 | 111 | 105 | 109 | 109 |
| Shili Mountain | Forest ecosystem | 19951121 | Provincial | 19.368 | 0 | 257 | 269 | 244 | 256 | 262 |
| Yangtian Mountain | Forest ecosystem | 19920101 | Provincial | 20 | 5 | 0 | 0 | 0 | 0 | 0 |
| Huanglongpu–Shimen Geological Section | Geological formation | 19870923 | Provincial | 20 | 1 | 0 | 0 | 0 | 0 | 0 |
| Shuijiang | Forest ecosystem | 19821209 | Provincial | 20 | 0 | 0 | 0 | 0 | 0 | 0 |
| Changshan Huangnitang Golden Spike | Geological formation | 19830801 | Provincial | 20.12 | 3 | 241 | 236 | 223 | 237 | 224 |
| Dahongbao | Forest ecosystem | 20050426 | Provincial | 20.35 | 0 | 144 | 149 | 143 | 147 | 142 |
| Tiesiling | Wild animal | 19971231 | Provincial | 20.4686 | 2 | 0 | 0 | 0 | 0 | 0 |
| Chaoyang Temple Fossil Wood | Geological formation | 19991230 | Provincial | 20.5 | 0 | 67 | 66 | 57 | 61 | 65 |
| Shunchang Qitai Mountain | Wild plant | 20150527 | Provincial | 20.5428 | 0 | 73 | 72 | 69 | 66 | 65 |
| Huangzangyu | Forest ecosystem | 19820601 | Provincial | 20.67 | 0 | 122 | 143 | 137 | 132 | 132 |
| Dafang Temple | Forest ecosystem | 20060417 | Provincial | 20.8 | 0 | 0 | 0 | 0 | 0 | 0 |
| Sanshiba | Forest ecosystem | 19960709 | Provincial | 21 | 3 | 0 | 0 | 0 | 0 | 0 |
| Dayang Lake Wetland Complex | Inland wetland | 20130729 | Provincial | 21.312 | 0 | 136 | 142 | 146 | 148 | 140 |
| Dangshan Former Course of the Yellow River | Inland wetland | 20101015 | Provincial | 21.8 | 0 | 36 | 40 | 34 | 36 | 29 |
| Shangchuan Island Macaque Reserve | Wild animal | 19900110 | Provincial | 22.3167 | 2 | 200 | 187 | 189 | 192 | 194 |
| Yunfeng Mountain | Forest ecosystem | 20001226 | Provincial | 22.33 | 6 | 124 | 130 | 108 | 132 | 121 |
| Chengtian Radon Spring | Geological formation | 19920929 | Provincial | 22.49 | 0 | 121 | 135 | 116 | 131 | 126 |
| Longhu Mountain | Wild animal | 19801119 | Provincial | 22.557 | 1 | 0 | 0 | 0 | 0 | 0 |
| Jiufu Mountain | Forest ecosystem | 20011008 | Provincial | 23.08 | 0 | 140 | 149 | 140 | 135 | 139 |
| Dapiao Mountain | Forest ecosystem | 20061230 | Provincial | 23.26 | 0 | 92 | 86 | 73 | 88 | 81 |
| Weizhou Island Bird Reserve | Wild animal | 19820608 | Provincial | 23.821 | 2 | 0 | 0 | 0 | 0 | 0 |
| Xiaosugan Lake | Wild animal | 19821011 | Provincial | 24 | 0 | 57 | 68 | 53 | 65 | 53 |
| Napahai Lake | Wild animal | 19840405 | Provincial | 24 | 1 | 0 | 0 | 0 | 0 | 0 |
| Jicheng Pere David’s Deer Reserve | Wild animal | 20001027 | Provincial | 24.6 | 31 | 0 | 0 | 0 | 0 | 0 |
| Yanquan | Forest ecosystem | 19850801 | Provincial | 24.6 | 0 | 209 | 211 | 192 | 207 | 198 |
| Tuo River | Inland wetland | 20090101 | Provincial | 24.63 | 0 | 0 | 0 | 0 | 0 | 0 |
| Yunjushan | Forest ecosystem | 19970106 | Provincial | 24.8 | 36 | 0 | 0 | 0 | 0 | 0 |
| Nanwan Hongzhuilin, | Wild plant | 20011030 | Provincial | 24.86 | 0 | 6 | 8 | 8 | 7 | 7 |
| Eucheuma Reserve | Wild plant | 19830428 | Provincial | 25 | 1 | 50 | 59 | 50 | 56 | 51 |
| Ruichang Southern Yew | Wild plant | 20060618 | Provincial | 25 | 0 | 0 | 0 | 0 | 0 | 0 |
| Weizi Mountain | Forest ecosystem | 20051220 | Provincial | 25.09 | 1 | 140 | 148 | 138 | 149 | 146 |
| Yinna Mountain | Forest ecosystem | 19851119 | Provincial | 25.66 | 0 | 0 | 0 | 0 | 0 | 0 |
| Hewang Temple Yangtze Finless Porpoise | Wild animal | 20120101 | Provincial | 26.06 | 0 | 0 | 0 | 0 | 0 | 0 |
| Xianju Kuocang Mountain | Forest ecosystem | 19910121 | Provincial | 27.01 | 1 | 0 | 0 | 0 | 0 | 0 |
| Jiulong Peak | Forest ecosystem | 20010406 | Provincial | 27.2 | 0 | 0 | 0 | 0 | 0 | 0 |
| Yunjishan | Forest ecosystem | 19900111 | Provincial | 27.27 | 0 | 155 | 153 | 151 | 153 | 151 |
| Liulianling | Forest ecosystem | 19810925 | Provincial | 27.4547 | 0 | 0 | 0 | 0 | 0 | 0 |
| Liugujian | Forest ecosystem | 20060417 | Provincial | 27.47 | 26 | 225 | 231 | 221 | 226 | 232 |
| Lingnan | Forest ecosystem | 19951121 | Provincial | 27.71 | 0 | 144 | 155 | 151 | 145 | 158 |
| Chao’an Phoenix Mountain | Forest ecosystem | 19990417 | Provincial | 28.12 | 0 | 159 | 163 | 149 | 156 | 155 |
| Fogang Guanyin Mountain | Forest ecosystem | 19851119 | Provincial | 28.168 | 0 | 155 | 156 | 153 | 154 | 149 |
| Yulin Tiantang Mountain | Forest ecosystem | 20080620 | Provincial | 28.17 | 0 | 0 | 0 | 0 | 0 | 0 |
| Beijiang River Endemic Rare Fish Reserve | Wild animal | 20060822 | Provincial | 28.2 | 28 | 0 | 0 | 0 | 0 | 0 |
| Laoyingjian | Forest ecosystem | 20020226 | Provincial | 28.275 | 0 | 123 | 131 | 122 | 117 | 129 |
| Tianlong Mountain | Forest ecosystem | 19930120 | Provincial | 28.667 | 1 | 155 | 156 | 148 | 155 | 164 |
| Haishan Coastal Rockfield | Geological formation | 19970712 | Provincial | 28.75 | 7 | 264 | 274 | 263 | 258 | 274 |
| Laiyang Lao Zhaishan | Forest ecosystem | 20001220 | Provincial | 29.085 | 0 | 249 | 259 | 252 | 253 | 261 |
| Qinglan | Ocean and seacoast | 19810925 | Provincial | 29.146 | 3 | 235 | 247 | 235 | 223 | 226 |
| Yellow River Stone Forest | Geological formation | 20010305 | Provincial | 30.4 | 0 | 242 | 226 | 224 | 241 | 239 |
| Jingshan Fraxinus hupehensis Reserve | Wild plant | 20020225 | Provincial | 30.437 | 0 | 268 | 275 | 275 | 256 | 266 |
| Nansizhang | Forest ecosystem | 20110101 | Provincial | 30.585 | 10 | 103 | 113 | 111 | 115 | 112 |
| Tonggu Giant Spiny Frog Reserve | Wild animal | 20061201 | Provincial | 30.7 | 2 | 0 | 0 | 0 | 0 | 0 |
| Fanjia | Forest ecosystem | 19810925 | Provincial | 31 | 0 | 100 | 102 | 95 | 104 | 97 |
| Sanpihu | Forest ecosystem | 19820608 | Provincial | 31.05 | 0 | 0 | 0 | 0 | 0 | 0 |
| Wufeng Orchid Reserve | Wild plant | 20081201 | Provincial | 31.2407 | 0 | 14 | 13 | 16 | 12 | 12 |
| Gedong Paleontological Fossil Reserve | Ancient organism remains | 20010221 | Provincial | 32 | 3 | 140 | 145 | 133 | 134 | 146 |
| Bayan Manduhu Dinosaur Fossil Reserve | Ancient organism remains | 20000413 | Provincial | 32.4874 | 3 | 63 | 66 | 53 | 63 | 50 |
| Songxi Baima Mountain | Forest ecosystem | 20030211 | Provincial | 32.502 | 0 | 117 | 132 | 118 | 119 | 124 |
| Jiaonan Lingshan Island | Ocean and seacoast | 20000301 | Provincial | 32.832 | 1 | 0 | 0 | 0 | 0 | 0 |
| Puyang Yellow River Wetland | Inland wetland | 20071120 | Provincial | 33.017 | 0 | 194 | 194 | 174 | 177 | 172 |
| Xinzhou Wutai Mountain | Steppe and meadow | 19861201 | Provincial | 33.3333 | 1 | 0 | 0 | 0 | 0 | 0 |
| Daliang | Wild plant | 20080401 | Provincial | 33.57 | 0 | 144 | 144 | 135 | 140 | 148 |
| Yangjiajie | Forest ecosystem | 20010101 | Provincial | 34 | 0 | 5 | 9 | 5 | 7 | 4 |
| Huaibin Huainan Wetland | Inland wetland | 20011205 | Provincial | 34 | 0 | 146 | 150 | 147 | 140 | 149 |
| Laoying Mountain | Forest ecosystem | 20000321 | Provincial | 34.14 | 0 | 0 | 0 | 0 | 0 | 0 |
| Lianyi Lake Yellow-billed Egret Reserve | Wild animal | 19930101 | Provincial | 34.33 | 0 | 122 | 123 | 117 | 125 | 118 |
| Maowei Sea Mangrove Forest | Ocean and seacoast | 20050117 | Provincial | 34.54 | 0 | 35 | 32 | 27 | 26 | 27 |
| Ant River Delta | Inland wetland | 19991228 | Provincial | 34.8 | 0 | 84 | 80 | 67 | 75 | 74 |
| Renhua Gaoping | Forest ecosystem | 19991114 | Provincial | 35.855 | 0 | 127 | 134 | 129 | 126 | 134 |
| Huangfu Mountain | Forest ecosystem | 19820601 | Provincial | 36 | 0 | 127 | 140 | 117 | 115 | 143 |
| Heilonggong Forest Frog Reserve | Wild animal | 19820430 | Provincial | 36 | 0 | 170 | 180 | 164 | 164 | 177 |
| Gutian | Forest ecosystem | 19840429 | Provincial | 36 | 0 | 133 | 151 | 134 | 135 | 129 |
| Yaoli | Forest ecosystem | 20000501 | Provincial | 36.27 | 0 | 0 | 0 | 0 | 0 | 0 |
| Shihua Cave | Geological formation | 20001226 | Provincial | 36.5 | 0 | 38 | 45 | 35 | 40 | 43 |
| Shibasuo | Inland wetland | 20010406 | Provincial | 36.516 | 0 | 191 | 186 | 192 | 189 | 186 |
| Ruyuan Grand Canyon | Forest ecosystem | 19980914 | Provincial | 36.73 | 0 | 0 | 0 | 0 | 0 | 0 |
| Dongshan Coral Reefs | Ocean and seacoast | 19970703 | Provincial | 36.8 | 0 | 0 | 0 | 0 | 0 | 0 |
| Xinfeng Jinpen Mountain | Forest ecosystem | 19820331 | Provincial | 37.117 | 4 | 258 | 274 | 253 | 266 | 269 |
| Juewu Mountain | Forest ecosystem | 20020114 | Provincial | 37.148 | 0 | 118 | 129 | 116 | 117 | 125 |
| Liao River Giant Salamander Reserve | Wild animal | 20110914 | Provincial | 37.335 | 0 | 139 | 149 | 143 | 133 | 132 |
| Dachouding | Forest ecosystem | 20000630 | Provincial | 37.613 | 0 | 157 | 158 | 159 | 168 | 165 |
| Guangdetai Mountain | Forest ecosystem | 20150527 | Provincial | 37.62 | 1 | 141 | 148 | 145 | 150 | 151 |
| Nancheng Furong Mountain | Forest ecosystem | 20091226 | Provincial | 38.2045 | 0 | 0 | 0 | 0 | 0 | 0 |
| Jiayin Dinosaur Fossils | Ancient organism remains | 19980406 | Provincial | 38.44 | 0 | 0 | 0 | 0 | 0 | 0 |
| Baomei Ridge | Forest ecosystem | 20060518 | Provincial | 38.443 | 4 | 232 | 235 | 221 | 233 | 227 |
| Yunmeng Mountain | Forest ecosystem | 20001226 | Provincial | 39 | 4 | 50 | 56 | 47 | 55 | 44 |
| Shangshe Lake Wetland | Inland wetland | 20060320 | Provincial | 39.293 | 0 | 188 | 194 | 184 | 187 | 190 |
| Suoxiyu | Forest ecosystem | 19820403 | Provincial | 39.31 | 0 | 0 | 0 | 0 | 0 | 0 |
| Linyi Daqingshan | Forest ecosystem | 20001228 | Provincial | 40 | 0 | 138 | 146 | 139 | 146 | 144 |
| Wuxi Mountain | Forest ecosystem | 20000318 | Provincial | 40.5 | 0 | 126 | 127 | 123 | 127 | 129 |
| Dangjiacha | Inland wetland | 20021216 | Provincial | 41 | 0 | 38 | 37 | 28 | 32 | 36 |
| Pengxi River Wetland | Inland wetland | 20080513 | Provincial | 41.07 | 0 | 116 | 130 | 121 | 127 | 135 |
| Miyun Wuling Mountain | Forest ecosystem | 20001226 | Provincial | 41.524 | 8 | 64 | 71 | 58 | 66 | 54 |
| Anxi Yunzhong Mountain | Forest ecosystem | 20011008 | Provincial | 41.645 | 0 | 0 | 0 | 0 | 0 | 0 |
| Wanggang Mountain | Forest ecosystem | 20150525 | Provincial | 41.935 | 1 | 256 | 265 | 255 | 256 | 257 |
| Baiyong | Forest ecosystem | 19900111 | Provincial | 41.945 | 3 | 0 | 0 | 0 | 0 | 0 |
| Golmud Euphrates Poplar Forest | Wild plant | 20000523 | Provincial | 42 | 0 | 7 | 5 | 4 | 8 | 4 |
| Xiaolongshan Heihe | Wild animal | 19821119 | Provincial | 42 | 0 | 63 | 58 | 53 | 48 | 56 |
| Heishiding | Forest ecosystem | 19790831 | Provincial | 42 | 30 | 221 | 221 | 210 | 212 | 209 |
| Qingyao Mountain | Wild animal | 19881120 | Provincial | 42 | 0 | 98 | 94 | 87 | 108 | 88 |
| Tuohu Lake | Inland wetland | 19940701 | Provincial | 42 | 0 | 114 | 117 | 98 | 108 | 100 |
| Nanxiong Dinosaur Fossil Sites | Ancient organism remains | 19921207 | Provincial | 42.21 | 5 | 0 | 0 | 0 | 0 | 0 |
| Shahu Lake | Inland wetland | 19970127 | Provincial | 42.477 | 0 | 31 | 42 | 33 | 37 | 40 |
| Leting Shijiutuo Islets | Ocean and seacoast | 20020529 | Provincial | 42.8155 | 0 | 0 | 0 | 0 | 0 | 0 |
| Longshan Luota | Wild plant | 19820101 | Provincial | 43.333 | 0 | 0 | 0 | 0 | 0 | 0 |
| Huangniushi | Forest ecosystem | 19990302 | Provincial | 43.34 | 0 | 214 | 219 | 212 | 208 | 216 |
| Gushi Huai River Wetland | Inland wetland | 20071120 | Provincial | 43.8778 | 0 | 133 | 143 | 129 | 129 | 135 |
| Huaying Mountain | Forest ecosystem | 20000902 | Provincial | 43.995 | 1 | 195 | 197 | 199 | 184 | 203 |
| Huishan | Forest ecosystem | 19810925 | Provincial | 44.624 | 0 | 259 | 261 | 248 | 259 | 252 |
| Qiaoling | Forest ecosystem | 19991230 | Provincial | 44.9 | 0 | 164 | 167 | 160 | 149 | 166 |
| Longgang Mountain | Forest ecosystem | 20030915 | Provincial | 44.95 | 0 | 46 | 52 | 43 | 46 | 48 |
| Shixiagou | Geological formation | 19900228 | Provincial | 45 | 0 | 0 | 0 | 0 | 0 | 0 |
| Tianhu Lake | Forest ecosystem | 20000318 | Provincial | 45 | 0 | 153 | 160 | 158 | 157 | 156 |
| Malipo Maguan Laojun Mountain | Forest ecosystem | 19811106 | Provincial | 45.09 | 0 | 188 | 188 | 183 | 176 | 185 |
| Tuan River Wetland | Inland wetland | 20010810 | Provincial | 45.47 | 0 | 95 | 96 | 85 | 90 | 86 |
| Jianhu Lake Wetland | Inland wetland | 20010201 | Provincial | 46.3028 | 0 | 0 | 0 | 0 | 0 | 0 |
| Qinglongdu Mountain | Forest ecosystem | 20131021 | Provincial | 47.056 | 0 | 31 | 27 | 27 | 27 | 32 |
| Yashu Mountain | Forest ecosystem | 19990209 | Provincial | 47.33 | 1 | 151 | 151 | 157 | 152 | 155 |
| Yellow Dragon Cave | Forest ecosystem | 20150527 | Provincial | 47.6516 | 0 | 0 | 0 | 0 | 0 | 0 |
| Gaotianyan | Forest ecosystem | 19990510 | Provincial | 47.8 | 3 | 0 | 0 | 0 | 0 | 0 |
| Guanshan | Forest ecosystem | 20051201 | Provincial | 48.35 | 0 | 40 | 45 | 36 | 39 | 41 |
| Dayishan Wetland | Inland wetland | 20140807 | Provincial | 48.35 | 0 | 27 | 37 | 33 | 29 | 30 |
| Shaoxing Source of Shun River | Inland wetland | 20160119 | Provincial | 48.526 | 0 | 0 | 0 | 0 | 0 | 0 |
| Diding | Forest ecosystem | 19860101 | Provincial | 49.074 | 0 | 207 | 199 | 194 | 194 | 189 |
| Tongbai Taibai Peak | Forest ecosystem | 19820624 | Provincial | 49.24 | 32 | 134 | 136 | 131 | 132 | 146 |
| Yangtze Yichang Chinese Sturgeon | Wild animal | 19960401 | Provincial | 50 | 14 | 221 | 219 | 212 | 206 | 218 |
| Banqiao | Forest ecosystem | 19951121 | Provincial | 50 | 2 | 0 | 0 | 0 | 0 | 0 |
| Anyue Dinosaur Fossil Sites | Ancient organism remains | 19980101 | Provincial | 50 | 0 | 0 | 0 | 0 | 0 | 0 |
| Longfeng Wetland | Inland wetland | 20030313 | Provincial | 50.5039 | 0 | 0 | 0 | 0 | 0 | 0 |
| Dongbai Mountain | Wild plant | 20031217 | Provincial | 50.715 | 0 | 0 | 0 | 0 | 0 | 0 |
| Kang County Giant Salamander Reserve | Wild animal | 20091021 | Provincial | 50.93 | 4 | 69 | 74 | 65 | 62 | 63 |
| Shangrao Wufushan | Forest ecosystem | 20140319 | Provincial | 51.0417 | 0 | 142 | 139 | 145 | 137 | 142 |
| Jianxin Bird Reserve | Wild animal | 19820608 | Provincial | 51.15 | 3 | 0 | 0 | 0 | 0 | 0 |
| Luobei Huso dauricus Reserve | Wild animal | 20151207 | Provincial | 51.23 | 0 | 0 | 0 | 0 | 0 | 0 |
| Liuyang Daweishan | Forest ecosystem | 19820403 | Provincial | 52.2 | 3 | 131 | 136 | 122 | 125 | 131 |
| Sponge Reefs | Ancient organism remains | 20000114 | Provincial | 52.3 | 0 | 112 | 111 | 102 | 105 | 117 |
| Guangnan Babao | Geological formation | 20020513 | Provincial | 52.32 | 0 | 197 | 189 | 184 | 181 | 178 |
| Ningdu Dalong Mountain | Forest ecosystem | 20140319 | Provincial | 52.3816 | 0 | 132 | 143 | 143 | 136 | 133 |
| Fengning Paleontological Fossils | Ancient organism remains | 20080215 | Provincial | 52.56 | 0 | 16 | 20 | 18 | 17 | 19 |
| Puwa | Forest ecosystem | 20050404 | Provincial | 53.965 | 0 | 84 | 102 | 87 | 83 | 83 |
| Erxianyan Wetland | Inland wetland | 20030302 | Provincial | 54.04 | 0 | 112 | 118 | 123 | 115 | 127 |
| Longtanwan | Forest ecosystem | 20021211 | Provincial | 54.64 | 0 | 50 | 54 | 48 | 38 | 43 |
| Sanfeng Mountain | Forest ecosystem | 20120120 | Provincial | 54.647 | 2 | 50 | 47 | 38 | 42 | 36 |
| Tianzi Mountain | Forest ecosystem | 19840509 | Provincial | 55 | 0 | 0 | 0 | 0 | 0 | 0 |
| Dayuanyuankou | Forest ecosystem | 19820403 | Provincial | 55.27 | 6 | 0 | 0 | 0 | 0 | 0 |
| Zuojia | Forest ecosystem | 19820528 | Provincial | 55.44 | 0 | 54 | 67 | 67 | 66 | 61 |
| Changtan | Forest ecosystem | 20000303 | Provincial | 55.857 | 3 | 241 | 239 | 237 | 243 | 238 |
| Sangsan Wetland | Inland wetland | 20100210 | Provincial | 56.44 | 0 | 8 | 10 | 11 | 10 | 10 |
| Luonan Giant Salamander | Wild animal | 19950101 | Provincial | 57.15 | 0 | 92 | 96 | 96 | 93 | 88 |
| Zhenjiang Yangtze River Dolphins Reserve | Wild animal | 20020830 | Provincial | 57.3 | 0 | 242 | 237 | 240 | 237 | 245 |
| Baixi | Forest ecosystem | 20011030 | Provincial | 57.555 | 0 | 220 | 234 | 226 | 226 | 228 |
| Nanlin | Forest ecosystem | 19810925 | Provincial | 57.7526 | 1 | 278 | 271 | 270 | 278 | 272 |
| Longling Xiaoheishan | Forest ecosystem | 19951012 | Provincial | 58.05 | 4 | 191 | 188 | 187 | 189 | 183 |
| Qimuzhang | Forest ecosystem | 19900705 | Provincial | 58.5 | 10 | 223 | 234 | 221 | 231 | 235 |
| Rongcheng Chengshantou | Ocean and seacoast | 19921130 | Provincial | 60.1539 | 0 | 0 | 0 | 0 | 0 | 0 |
| Yinhu Lake | Inland wetland | 20030601 | Provincial | 60.434 | 0 | 153 | 160 | 150 | 158 | 154 |
| Hunan Qiyang Salamander | Wild animal | 20040323 | Provincial | 60.6 | 13 | 155 | 158 | 170 | 159 | 163 |
| Linzhouding | Wild animal | 20071108 | Provincial | 60.648 | 0 | 246 | 252 | 240 | 228 | 237 |
| Qinggeda Lake Nature Reserve | Inland wetland | 20050101 | Provincial | 60.95 | 1 | 60 | 69 | 55 | 65 | 64 |
| Xiqi Alsophila Reserve | Wild plant | 20050120 | Provincial | 62.2227 | 0 | 204 | 201 | 188 | 181 | 187 |
| Tuanbo Bird Reserve | Wild animal | 19950622 | Provincial | 62.7 | 0 | 112 | 117 | 114 | 114 | 109 |
| Xiaoxian Yellow River Former Course Wetland | Inland wetland | 20090915 | Provincial | 63.16 | 0 | 154 | 163 | 146 | 156 | 152 |
| Tongle Mountain | Forest ecosystem | 19851119 | Provincial | 63.53 | 0 | 0 | 0 | 0 | 0 | 0 |
| Jingwei Wetland | Inland wetland | 20011120 | Provincial | 63.53 | 0 | 165 | 164 | 154 | 151 | 158 |
| Shangyou Wuzhi Peak | Forest ecosystem | 19921020 | Provincial | 63.68 | 4 | 126 | 133 | 136 | 139 | 127 |
| Kanghe | Forest ecosystem | 19990825 | Provincial | 64.848 | 2 | 221 | 236 | 226 | 232 | 234 |
| Lashi Lake Plateau Wetland | Inland wetland | 19980608 | Provincial | 65.23 | 1 | 102 | 102 | 99 | 99 | 100 |
| Gupo Mountain | Forest ecosystem | 19820608 | Provincial | 65.496 | 3 | 185 | 171 | 175 | 186 | 178 |
| Liufeng Lake | Inland wetland | 19961113 | Provincial | 65.91 | 0 | 22 | 23 | 18 | 16 | 18 |
| Shangtun Wetland | Inland wetland | 20140807 | Provincial | 65.94 | 0 | 22 | 23 | 18 | 19 | 18 |
| Shuangliao Siberian Crane Reserve | Wild animal | 20140124 | Provincial | 66.03 | 0 | 29 | 28 | 25 | 26 | 24 |
| Baigui Mountain Wetland | Inland wetland | 20071120 | Provincial | 66.5225 | 0 | 181 | 186 | 171 | 168 | 179 |
| Huoshan Foziling | Forest ecosystem | 20001222 | Provincial | 66.67 | 4 | 129 | 135 | 129 | 137 | 135 |
| Xinyang Tianmu Mountain | Forest ecosystem | 20011205 | Provincial | 67.5 | 0 | 149 | 148 | 138 | 140 | 151 |
| Sanyue | Forest ecosystem | 20000630 | Provincial | 67.618 | 1 | 219 | 208 | 211 | 216 | 204 |
| Poyang Lake Yangtze Finless Porpoise Reserve | Wild animal | 20040430 | Provincial | 68 | 0 | 140 | 149 | 141 | 151 | 141 |
| Sangpu Mountain – Shuangkeng | Forest ecosystem | 20040415 | Provincial | 68.091 | 0 | 340 | 339 | 344 | 339 | 347 |
| Gulinqing | Forest ecosystem | 19821001 | Provincial | 68.326 | 6 | 232 | 232 | 229 | 214 | 221 |
| Daxian Peak | Forest ecosystem | 20030211 | Provincial | 68.861 | 0 | 245 | 234 | 235 | 242 | 232 |
| Daxiao Langou | Wild plant | 19980101 | Provincial | 69.32 | 1 | 76 | 88 | 82 | 79 | 89 |
| Ranwu Lake Wetland | Inland wetland | 19960101 | Provincial | 69.78 | 2 | 0 | 0 | 0 | 0 | 0 |
| Xianxia Ridge | Forest ecosystem | 20160503 | Provincial | 69.9 | 0 | 128 | 142 | 131 | 131 | 136 |
| Yangshimu | Forest ecosystem | 19990101 | Provincial | 70.06 | 0 | 137 | 140 | 146 | 141 | 142 |
| Quanzhou Bay Estuarine Wetland | Ocean and seacoast | 20020226 | Provincial | 70.0884 | 0 | 0 | 0 | 0 | 0 | 0 |
| Wuling Mountain | Forest ecosystem | 20000724 | Provincial | 70.11 | 3 | 144 | 150 | 149 | 149 | 161 |
| Taiyang River | Forest ecosystem | 19860220 | Provincial | 70.35 | 0 | 216 | 214 | 197 | 188 | 193 |
| Chenhe Cave | Forest ecosystem | 19991201 | Provincial | 70.5436 | 1 | 223 | 237 | 221 | 225 | 243 |
| Zhaohu Mountain | Forest ecosystem | 19960610 | Provincial | 70.61 | 3 | 67 | 74 | 63 | 73 | 73 |
| Kanglong Forest | Forest ecosystem | 19961011 | Provincial | 70.87 | 0 | 125 | 135 | 129 | 128 | 136 |
| Shixing South Mountain | Forest ecosystem | 20010620 | Provincial | 71.13 | 4 | 202 | 196 | 198 | 206 | 207 |
| Daxigou | Forest ecosystem | 20061001 | Provincial | 71.5484 | 0 | 147 | 145 | 121 | 135 | 143 |
| Thousand Lakes Wetland | Inland wetland | 20070105 | Provincial | 71.56 | 0 | 84 | 86 | 85 | 75 | 75 |
| Wulong Baima Mountain | Forest ecosystem | 19981018 | Provincial | 72 | 0 | 142 | 152 | 140 | 148 | 147 |
| Xundian Black-necked Crane Reserve | Wild animal | 20000115 | Provincial | 72.173 | 0 | 156 | 149 | 157 | 132 | 140 |
| Qingxin Baiwan | Forest ecosystem | 20001228 | Provincial | 72.191 | 0 | 215 | 205 | 197 | 204 | 201 |
| Tiexi | Forest ecosystem | 19930101 | Provincial | 72.35 | 0 | 27 | 26 | 24 | 22 | 21 |
| Shuimogou | Wild animal | 20000608 | Provincial | 73.37 | 0 | 89 | 98 | 90 | 88 | 95 |
| Source of Xin River | Forest ecosystem | 20030531 | Provincial | 73.37 | 0 | 165 | 164 | 160 | 163 | 177 |
| Wengyuan Qingyun Mountain | Forest ecosystem | 20021201 | Provincial | 73.59 | 0 | 210 | 222 | 208 | 210 | 224 |
| Qi'ao – Dangan Island | Ocean and seacoast | 19891124 | Provincial | 73.7377 | 5 | 0 | 0 | 0 | 0 | 0 |
| Woken River | Inland wetland | 20111223 | Provincial | 73.87 | 0 | 26 | 28 | 26 | 28 | 29 |
| Zhonghua Mountain Bird Reserve | Wild animal | 20080901 | Provincial | 74.2661 | 0 | 164 | 160 | 158 | 152 | 160 |
| Wangerbao | Forest ecosystem | 20011224 | Provincial | 74.96 | 0 | 0 | 0 | 0 | 0 | 0 |
| Nandagang Wetland and Bird Reserve | Inland wetland | 19950305 | Provincial | 75 | 0 | 0 | 0 | 0 | 0 | 0 |
| Dagui Mountain | Forest ecosystem | 19980716 | Provincial | 75.052 | 0 | 286 | 288 | 291 | 290 | 293 |
| Xingang | Forest ecosystem | 19760616 | Provincial | 75.13 | 0 | 247 | 245 | 233 | 245 | 248 |
| Qiexin | Forest ecosystem | 19810925 | Provincial | 75.88 | 25 | 0 | 0 | 0 | 0 | 0 |
| Lujiao Lake Sika Deer Reserve | Wild animal | 20111223 | Provincial | 76.78 | 0 | 22 | 28 | 18 | 24 | 24 |
| Kongtong Archipelago | Ocean and seacoast | 20030304 | Provincial | 76.9 | 6 | 0 | 0 | 0 | 0 | 0 |
| Weiyuan River | Forest ecosystem | 19830427 | Provincial | 77.04 | 0 | 172 | 166 | 156 | 157 | 160 |
| Mufu Mountain | Forest ecosystem | 19950101 | Provincial | 77.338 | 4 | 132 | 144 | 133 | 132 | 134 |
| Monkey Rock | Forest ecosystem | 20030915 | Provincial | 77.692 | 0 | 34 | 44 | 38 | 37 | 35 |
| Lechang Dayao Mountain | Forest ecosystem | 20000316 | Provincial | 79.139 | 26 | 166 | 162 | 166 | 178 | 162 |
| Longwen – Huangtian | Forest ecosystem | 20000320 | Provincial | 79.605 | 11 | 215 | 219 | 216 | 219 | 214 |
| Xijiang Lanke Mountain | Forest ecosystem | 20000501 | Provincial | 79.6159 | 0 | 302 | 294 | 302 | 299 | 301 |
| Cangxi Jiulong Mountain | Forest ecosystem | 20001201 | Provincial | 80.48 | 0 | 0 | 0 | 0 | 0 | 0 |
| Yinghu Wetland | Inland wetland | 20030210 | Provincial | 80.5 | 0 | 88 | 104 | 90 | 89 | 94 |
| Qixing Pit | Forest ecosystem | 19951201 | Provincial | 80.603 | 0 | 267 | 270 | 259 | 264 | 263 |
| Huangshi’ao | Forest ecosystem | 20000321 | Provincial | 80.968 | 0 | 218 | 220 | 210 | 220 | 227 |
| Ninglang Lugu Lake | Inland wetland | 19860320 | Provincial | 81.33 | 0 | 55 | 59 | 52 | 55 | 49 |
| Source of Fu River | Forest ecosystem | 20041216 | Provincial | 81.877 | 0 | 169 | 169 | 176 | 168 | 165 |
| Bayan Riverside | Inland wetland | 20131119 | Provincial | 82.71 | 0 | 0 | 0 | 0 | 0 | 0 |
| Jiache | Wild plant | 19840405 | Provincial | 82.82 | 0 | 136 | 127 | 121 | 108 | 117 |
| Fusong Wild Ginseng Reserve | Forest ecosystem | 20081031 | Provincial | 83.1563 | 0 | 0 | 0 | 0 | 0 | 0 |
| Jiaxi | Forest ecosystem | 19810925 | Provincial | 83.2667 | 0 | 0 | 0 | 0 | 0 | 0 |
| Wufu Baoding Peak | Forest ecosystem | 19820608 | Provincial | 83.493 | 0 | 155 | 152 | 149 | 154 | 149 |
| Hasi Mountain | Forest ecosystem | 20020114 | Provincial | 84 | 4 | 26 | 26 | 15 | 24 | 21 |
| Nongla | Forest ecosystem | 20080619 | Provincial | 84.81 | 1 | 0 | 0 | 0 | 0 | 0 |
| Phoenix Jiuchongyan Karst | Forest ecosystem | 20020408 | Provincial | 85 | 0 | 115 | 131 | 114 | 113 | 128 |
| Guxiu | Wild animal | 19820608 | Provincial | 85.46 | 0 | 183 | 183 | 176 | 180 | 180 |
| Wanbao Mountain | Forest ecosystem | 20040226 | Provincial | 86.67 | 0 | 81 | 86 | 66 | 79 | 75 |
| Nanjing Yangtze Finless Porpoise | Wild animal | 20140910 | Provincial | 86.92 | 10 | 216 | 226 | 218 | 220 | 225 |
| Wild Duck Lake | Inland wetland | 19991230 | Provincial | 87 | 7 | 80 | 85 | 76 | 74 | 79 |
| Daji Mountain | Forest ecosystem | 19980501 | Provincial | 87.53 | 0 | 89 | 100 | 87 | 91 | 83 |
| Xidaquan | Forest ecosystem | 19970107 | Provincial | 87.77 | 0 | 28 | 32 | 28 | 26 | 26 |
| Phoenix Two-headed Goat | Forest ecosystem | 19860101 | Provincial | 88.38 | 6 | 141 | 150 | 137 | 137 | 149 |
| Jinxiu Laoshan | Forest ecosystem | 20070121 | Provincial | 88.75 | 10 | 212 | 213 | 200 | 217 | 212 |
| Dangshan Crisp Pear Reserve | Wild plant | 20001222 | Provincial | 88.92 | 0 | 114 | 113 | 88 | 112 | 107 |
| Yan Mountain | Forest ecosystem | 20020620 | Provincial | 88.926 | 3 | 78 | 77 | 70 | 81 | 74 |
| Shuilian | Inland wetland | 20030916 | Provincial | 89.52 | 0 | 18 | 19 | 17 | 14 | 16 |
| Anhua Red Rock | Forest ecosystem | 19990108 | Provincial | 89.6 | 0 | 118 | 131 | 124 | 117 | 126 |
| Shaxi | Forest ecosystem | 19960410 | Provincial | 90.4 | 0 | 218 | 209 | 209 | 208 | 215 |
| Jinguang Temple | Forest ecosystem | 19880715 | Provincial | 91.93 | 0 | 143 | 134 | 139 | 127 | 132 |
| Chifeng Qingshan Geological Site | Geological formation | 19980401 | Provincial | 92 | 0 | 17 | 17 | 14 | 15 | 17 |
| Dajiuhu Wetland | Inland wetland | 20031201 | Provincial | 93.2 | 7 | 93 | 89 | 83 | 93 | 97 |
| Wanfo Mountain Geopark | Geological formation | 19981025 | Provincial | 94.35 | 0 | 107 | 118 | 103 | 108 | 114 |
| Zhaoyuan Luoshan | Forest ecosystem | 20010323 | Provincial | 94.796 | 4 | 90 | 100 | 97 | 99 | 96 |
| Dasukgan Lake | Wild animal | 19821011 | Provincial | 96.4 | 0 | 6 | 6 | 4 | 6 | 5 |
| Baili Rhododendron Reserve | Wild plant | 20011101 | Provincial | 96.6906 | 0 | 149 | 156 | 141 | 147 | 147 |
| Luofu Mountain | Forest ecosystem | 19851119 | Provincial | 97.442 | 38 | 292 | 300 | 292 | 297 | 301 |
| Shuguang Silkworm Reserve | Wild animal | 19920801 | Provincial | 97.66 | 0 | 34 | 40 | 36 | 40 | 34 |
| Daze Mountain | Forest ecosystem | 20000401 | Provincial | 97.83 | 3 | 105 | 115 | 114 | 116 | 103 |
| Penglai Aishan | Forest ecosystem | 19890301 | Provincial | 98.246 | 0 | 96 | 110 | 97 | 105 | 100 |
| Taiyang Mountain | Forest ecosystem | 20000801 | Provincial | 98.51 | 1 | 136 | 138 | 133 | 130 | 141 |
| Huashuichong | Forest ecosystem | 19820608 | Provincial | 99.29 | 0 | 181 | 166 | 173 | 184 | 177 |
| Pingdingshan – Qiguo Mountain | Geological formation | 19971201 | Provincial | 100 | 0 | 0 | 0 | 0 | 0 | 0 |
| Jian Mountain | Wild animal | 19921216 | Provincial | 100.4 | 5 | 0 | 0 | 0 | 0 | 0 |
| Caofeidian Wetland and Bird Reserve | Inland wetland | 20040101 | Provincial | 100.814 | 0 | 64 | 70 | 61 | 67 | 64 |
| Guantou Mountain | Forest ecosystem | 20051206 | Provincial | 101.401 | 0 | 40 | 44 | 37 | 36 | 35 |
| Anzi River | Wild animal | 19930828 | Provincial | 101.414 | 5 | 143 | 153 | 146 | 139 | 148 |
| Qiyao Mountain | Forest ecosystem | 20050411 | Provincial | 101.748 | 0 | 132 | 138 | 129 | 128 | 145 |
| Yunyang Mountain | Forest ecosystem | 20060809 | Provincial | 101.8 | 2 | 179 | 174 | 187 | 180 | 180 |
| Beidashan | Forest ecosystem | 20090825 | Provincial | 101.85 | 0 | 28 | 28 | 25 | 26 | 25 |
| Liannan Bandong | Forest ecosystem | 20000901 | Provincial | 101.958 | 1 | 204 | 197 | 200 | 204 | 193 |
| Xiwahuang Wetland | Inland wetland | 19900401 | Provincial | 102.01 | 0 | 21 | 26 | 18 | 21 | 20 |
| ongshan Yinjiajie | Forest ecosystem | 19990818 | Provincial | 102.06 | 0 | 113 | 125 | 118 | 115 | 129 |
| Zhilaishan | Forest ecosystem | 19971003 | Provincial | 102.27 | 4 | 104 | 110 | 107 | 113 | 107 |
| Source of Zhang River | Forest ecosystem | 20020701 | Provincial | 102.656 | 0 | 90 | 100 | 76 | 92 | 102 |
| Anbang River | Inland wetland | 19930301 | Provincial | 102.95 | 0 | 33 | 41 | 35 | 33 | 40 |
| Tonghe Longkou | Forest ecosystem | 19971112 | Provincial | 103.03 | 0 | 17 | 23 | 15 | 17 | 16 |
| Shuangcha River | Inland wetland | 19890101 | Provincial | 103.6 | 0 | 20 | 21 | 19 | 20 | 19 |
| Sijian Mountain Giant Salamander | Wild animal | 20041001 | Provincial | 103.84 | 0 | 162 | 163 | 150 | 156 | 168 |
| Naomugen Tertiary Stratigraphic Profile Site | Geological formation | 19970501 | Provincial | 104.1 | 0 | 5 | 10 | 6 | 7 | 8 |
| Baiyin Kuren Relict Gull | Wild animal | 20010428 | Provincial | 104.15 | 0 | 11 | 14 | 13 | 10 | 15 |
| Sankuaishi | Forest ecosystem | 20030915 | Provincial | 104.34 | 0 | 38 | 46 | 40 | 38 | 39 |
| Lion Peak | Forest ecosystem | 20020101 | Provincial | 104.513 | 6 | 137 | 144 | 129 | 138 | 142 |
| Source of Zhang River | Forest ecosystem | 20040920 | Provincial | 104.52 | 0 | 182 | 177 | 182 | 184 | 172 |
| Dahuangpu | Inland wetland | 20040921 | Provincial | 104.65 | 3 | 94 | 111 | 94 | 94 | 90 |
| Qixiling Ridge | Forest ecosystem | 19991226 | Provincial | 105 | 2 | 155 | 162 | 159 | 155 | 161 |
| Fengxi | Forest ecosystem | 19840429 | Provincial | 105.9 | 20 | 216 | 225 | 218 | 223 | 227 |
| Jiulonggou | Inland wetland | 20140214 | Provincial | 106.51 | 0 | 30 | 35 | 29 | 27 | 33 |
| Shijiu Lake | Inland wetland | 20010406 | Provincial | 106.67 | 0 | 0 | 0 | 0 | 0 | 0 |
| East Harbin Riverside Wetland | Inland wetland | 20100225 | Provincial | 107.25 | 0 | 38 | 49 | 42 | 45 | 41 |
| Bijia Mountain | Forest ecosystem | 20000602 | Provincial | 107.278 | 2 | 201 | 183 | 190 | 195 | 186 |
| Puzhehei | Forest ecosystem | 20020513 | Provincial | 107.46 | 1 | 159 | 139 | 143 | 111 | 129 |
| Jiangmen Taishan Sousa chinensis Reserve | Wild animal | 20031213 | Provincial | 107.477 | 0 | 0 | 0 | 0 | 0 | 0 |
| Shanglin Longshan | Forest ecosystem | 20010101 | Provincial | 107.49 | 0 | 267 | 264 | 251 | 251 | 252 |
| Chengfang | Forest ecosystem | 20070809 | Provincial | 107.598 | 1 | 125 | 139 | 128 | 131 | 135 |
| Shoulu Mountain | Forest ecosystem | 19800101 | Provincial | 108.75 | 0 | 17 | 12 | 14 | 13 | 17 |
| Jianling Ridge | Forest ecosystem | 19810925 | Provincial | 108.987 | 7 | 285 | 277 | 282 | 284 | 285 |
| Culai Mountain | Forest ecosystem | 19991101 | Provincial | 109.15 | 0 | 135 | 140 | 133 | 135 | 136 |
| Yicheng Elaeagnus mollis Reserve | Wild plant | 20051206 | Provincial | 109.34 | 0 | 45 | 48 | 48 | 52 | 48 |
| Binxian Riverside | Inland wetland | 20121228 | Provincial | 109.89 | 0 | 35 | 49 | 40 | 45 | 39 |
| Wild River | Forest ecosystem | 20040427 | Provincial | 109.96 | 0 | 89 | 95 | 86 | 89 | 86 |
| Yingzhou West Lake | Inland wetland | 20020422 | Provincial | 110 | 0 | 183 | 188 | 177 | 170 | 184 |
| Anxing Wetland | Inland wetland | 20020304 | Provincial | 110 | 0 | 23 | 28 | 25 | 22 | 22 |
| Muli Duckbill Site | Wild animal | 19630402 | Provincial | 110.134 | 1 | 51 | 53 | 45 | 51 | 49 |
| Anshuzhuang | Forest ecosystem | 20111206 | Provincial | 110.16 | 0 | 79 | 77 | 79 | 76 | 78 |
| Yaolinsi Crown Mountain | Wild animal | 20020620 | Provincial | 110.17 | 0 | 77 | 85 | 74 | 76 | 72 |
| Huanyang Beach | Inland wetland | 20110223 | Provincial | 110.35 | 4 | 80 | 96 | 83 | 81 | 83 |
| Jiamusi Riverside Wetland | Inland wetland | 20070813 | Provincial | 112.67 | 0 | 64 | 64 | 58 | 66 | 57 |
| Lixian Xiangshan | Forest ecosystem | 19920926 | Provincial | 113.3 | 0 | 38 | 38 | 34 | 32 | 37 |
| Yishan | Forest ecosystem | 20051020 | Provincial | 113.4 | 6 | 134 | 144 | 136 | 138 | 134 |
| Lingyun Mountain | Forest ecosystem | 19920920 | Provincial | 113.426 | 0 | 134 | 142 | 138 | 134 | 129 |
| Nyong Chinese Dove Tree Reserve | Wild plant | 20140105 | Provincial | 113.982 | 0 | 137 | 135 | 127 | 118 | 126 |
| Zijin Mountain | Forest ecosystem | 20020620 | Provincial | 114.2 | 0 | 34 | 28 | 26 | 34 | 27 |
| Dayi Mountain | Forest ecosystem | 20010621 | Provincial | 114.31 | 0 | 165 | 160 | 168 | 166 | 165 |
| Eagle Beak Rock | Wild animal | 20040427 | Provincial | 114.62 | 0 | 74 | 81 | 69 | 67 | 77 |
| Wuding River | Inland wetland | 20091216 | Provincial | 114.8 | 2 | 34 | 35 | 29 | 33 | 34 |
| Lago Bird Reserve | Wild animal | 19820608 | Provincial | 115 | 0 | 205 | 187 | 183 | 194 | 190 |
| Taojiangyuan | Forest ecosystem | 20060919 | Provincial | 115.6 | 3 | 184 | 186 | 183 | 179 | 185 |
| Gudou Mountain | Forest ecosystem | 19990401 | Provincial | 115.675 | 2 | 248 | 238 | 231 | 246 | 235 |
| Chenhu Wetland | Inland wetland | 19940101 | Provincial | 115.791 | 0 | 197 | 202 | 198 | 191 | 207 |
| Haifeng Avifauna Reserve | Wild animal | 19980728 | Provincial | 115.905 | 3 | 264 | 271 | 255 | 266 | 270 |
| Mount Yaogu | Forest ecosystem | 20020425 | Provincial | 116.178 | 0 | 182 | 177 | 175 | 171 | 179 |
| Yangdong Mountain Twelve-degree Water | Forest ecosystem | 19981228 | Provincial | 116.51 | 6 | 156 | 154 | 161 | 162 | 164 |
| Shangxi Stream | Forest ecosystem | 19810925 | Provincial | 116.622 | 2 | 268 | 261 | 257 | 265 | 260 |
| Mount Limu | Forest ecosystem | 20040723 | Provincial | 117.01 | 5 | 248 | 247 | 233 | 253 | 245 |
| Hengshan | Forest ecosystem | 20051206 | Provincial | 117.644 | 3 | 30 | 30 | 26 | 27 | 31 |
| Tianguang Mountain | Forest ecosystem | 20050101 | Provincial | 117.68 | 0 | 182 | 177 | 187 | 183 | 186 |
| Longya Gorge | Wild animal | 20040101 | Provincial | 118.045 | 9 | 228 | 221 | 215 | 219 | 218 |
| Taishan | Forest ecosystem | 20060201 | Provincial | 118.92 | 18 | 150 | 164 | 154 | 151 | 159 |
| Tianxin | Forest ecosystem | 20021119 | Provincial | 119.686 | 4 | 183 | 177 | 181 | 196 | 178 |
| Liuleng Mountain | Forest ecosystem | 20051206 | Provincial | 120 | 0 | 30 | 24 | 20 | 28 | 24 |
| Manshan | Forest ecosystem | 20010301 | Provincial | 120.28 | 8 | 46 | 46 | 34 | 47 | 37 |
| Sima River Basin Wetland | Inland wetland | 20000508 | Provincial | 121.62 | 0 | 109 | 121 | 107 | 110 | 126 |
| Rhesus Monkey Ridge | Forest ecosystem | 20040723 | Provincial | 122.153 | 0 | 239 | 236 | 220 | 234 | 234 |
| Huangguan Mountain | Wild animal | 20010413 | Provincial | 123.72 | 10 | 88 | 100 | 78 | 88 | 95 |
| Naza Cycad Reserve | Wild plant | 19820608 | Provincial | 124.58 | 0 | 151 | 158 | 140 | 149 | 158 |
| Wolong Lake | Inland wetland | 20010101 | Provincial | 127.5 | 1 | 51 | 65 | 52 | 51 | 56 |
| Sanshiliunong–Longjun | Forest ecosystem | 19810101 | Provincial | 128.22 | 0 | 250 | 260 | 240 | 244 | 233 |
| Huliu River Wetland | Inland wetland | 20071228 | Provincial | 129.18 | 1 | 27 | 26 | 23 | 26 | 25 |
| Hanxin Ridge | Forest ecosystem | 20020620 | Provincial | 129.31 | 3 | 66 | 62 | 61 | 74 | 64 |
| Daihai Lake Wetland | Inland wetland | 19991201 | Provincial | 129.7 | 0 | 27 | 25 | 21 | 24 | 20 |
| Lushan | Forest ecosystem | 19860826 | Provincial | 130.7 | 3 | 107 | 113 | 95 | 113 | 107 |
| Source of Yalu River | Inland wetland | 20151231 | Provincial | 130.81 | 0 | 0 | 0 | 0 | 0 | 0 |
| Zhouzhi Heihe River Wetland | Inland wetland | 20061230 | Provincial | 131.255 | 0 | 0 | 0 | 0 | 0 | 0 |
| Erlongtao Wetland | Inland wetland | 20100225 | Provincial | 132.62 | 0 | 32 | 36 | 30 | 26 | 31 |
| Niuwei River | Wild animal | 20040427 | Provincial | 134.92 | 1 | 67 | 73 | 60 | 56 | 73 |
| Source of Hailan River | Forest ecosystem | 20140807 | Provincial | 135.5 | 2 | 23 | 25 | 24 | 18 | 24 |
| Wen County Chinese Giant Salamander Reserve | Wild animal | 20040509 | Provincial | 135.79 | 1 | 76 | 80 | 69 | 65 | 70 |
| Mosika | Wild animal | 19951108 | Provincial | 137 | 0 | 22 | 23 | 22 | 22 | 22 |
| Zhijiang Sandao Pit | Forest ecosystem | 20001130 | Provincial | 137.68 | 6 | 139 | 145 | 132 | 139 | 144 |
| Laoshan | Forest ecosystem | 20010406 | Provincial | 138.55 | 0 | 146 | 157 | 141 | 152 | 155 |
| Tianqiao Mountain | Forest ecosystem | 19980917 | Provincial | 138.78 | 17 | 149 | 148 | 149 | 142 | 163 |
| Yuanshan | Forest ecosystem | 19860826 | Provincial | 139.14 | 0 | 150 | 157 | 148 | 147 | 152 |
| Siwang Mountain | Forest ecosystem | 20040226 | Provincial | 140 | 10 | 0 | 0 | 0 | 0 | 0 |
| Qianhe Mountain | Wild animal | 20030801 | Provincial | 140.375 | 0 | 42 | 40 | 33 | 43 | 34 |
| Hailar Western Hill | Forest ecosystem | 20001012 | Provincial | 140.62 | 5 | 38 | 47 | 39 | 46 | 38 |
| Bita Lake | Inland wetland | 19820101 | Provincial | 141.33 | 1 | 43 | 50 | 39 | 45 | 40 |
| Source of Zhuozhang River | Forest ecosystem | 20020620 | Provincial | 142 | 0 | 39 | 40 | 39 | 41 | 36 |
| Dongxi Lake | Wild animal | 20010406 | Provincial | 142 | 0 | 108 | 119 | 103 | 101 | 112 |
| Lotus Mountain Baipenzhu | Inland wetland | 19991229 | Provincial | 142.1 | 0 | 272 | 278 | 259 | 272 | 280 |
| Damu Mountain | Forest ecosystem | 20010306 | Provincial | 144.801 | 4 | 125 | 133 | 124 | 133 | 129 |
| Source of Xiu River Wumei Mountain | Forest ecosystem | 20070809 | Provincial | 144.85 | 33 | 144 | 149 | 135 | 149 | 138 |
| Bali River | Wild animal | 20010406 | Provincial | 146 | 0 | 120 | 129 | 106 | 111 | 115 |
| Donghu Wetland | Inland wetland | 20001205 | Provincial | 146 | 0 | 27 | 31 | 24 | 24 | 23 |
| A’erqi Mountain Juniperus sabina Reserve | Wild plant | 20011226 | Provincial | 147.87 | 0 | 5 | 9 | 5 | 8 | 7 |
| Ehuangzhang | Forest ecosystem | 20001016 | Provincial | 147.912 | 3 | 286 | 286 | 283 | 281 | 279 |
| Xinkai Ridge | Forest ecosystem | 20011225 | Provincial | 149.63 | 3 | 83 | 82 | 72 | 75 | 82 |
| Liuliping Rhesus Monkey Reserve | Wild animal | 20071130 | Provincial | 149.7 | 2 | 46 | 49 | 43 | 47 | 39 |
| Xiaonanhai Lake | Geological formation | 19990301 | Provincial | 150 | 5 | 130 | 140 | 132 | 137 | 147 |
| Hukou Wetland | Inland wetland | 19970204 | Provincial | 150 | 0 | 0 | 0 | 0 | 0 | 0 |
| Longfeng Lake | Inland wetland | 20090930 | Provincial | 150 | 0 | 37 | 44 | 35 | 41 | 35 |
| Kubuqi Desert | Wild plant | 19990101 | Provincial | 150 | 0 | 8 | 11 | 6 | 8 | 6 |
| Yunxi Wulong River | Forest ecosystem | 20040513 | Provincial | 151.21 | 0 | 75 | 76 | 70 | 70 | 74 |
| Bafu Ridge | Forest ecosystem | 20020620 | Provincial | 152.67 | 1 | 39 | 33 | 30 | 36 | 32 |
| Meiligeng | Forest ecosystem | 20001206 | Provincial | 152.68 | 0 | 95 | 104 | 98 | 95 | 103 |
| Tongchuan Xiangshan | Wild animal | 20040427 | Provincial | 154.06 | 1 | 76 | 70 | 60 | 73 | 70 |
| Fengshuba | Forest ecosystem | 19981228 | Provincial | 158.065 | 1 | 214 | 219 | 217 | 211 | 220 |
| Lanyuan Grassland | Steppe and meadow | 20111223 | Provincial | 158.74 | 0 | 31 | 38 | 28 | 35 | 29 |
| Mount Teng | Forest ecosystem | 19971101 | Provincial | 159.1 | 5 | 254 | 255 | 252 | 241 | 232 |
| Sishui River | Forest ecosystem | 19870101 | Provincial | 159.439 | 2 | 212 | 214 | 206 | 202 | 202 |
| Mount Zixi | Forest ecosystem | 19880101 | Provincial | 160 | 1 | 180 | 173 | 178 | 166 | 159 |
| Sixiannao Ridge | Forest ecosystem | 20020620 | Provincial | 160 | 0 | 43 | 45 | 37 | 40 | 36 |
| Kaifeng Liuyuankou | Inland wetland | 19940609 | Provincial | 163.085 | 1 | 150 | 157 | 144 | 147 | 142 |
| Yuanyang Guanyin Mountain | Forest ecosystem | 19940527 | Provincial | 163.591 | 0 | 204 | 206 | 207 | 193 | 206 |
| Northern Guangdong South China Tiger | Wild animal | 19900111 | Provincial | 163.608 | 20 | 155 | 155 | 160 | 162 | 152 |
| Mount Renzu | Forest ecosystem | 20020620 | Provincial | 164.044 | 0 | 39 | 42 | 36 | 32 | 31 |
| Mount Tuanyuan | Forest ecosystem | 20020620 | Provincial | 164.77 | 0 | 26 | 28 | 23 | 29 | 21 |
| Halahai | Inland wetland | 20011231 | Provincial | 165.64 | 0 | 39 | 47 | 38 | 42 | 34 |
| Weihuling | Forest ecosystem | 20131018 | Provincial | 166.6 | 0 | 28 | 34 | 31 | 29 | 25 |
| Sumushan | Forest ecosystem | 19990101 | Provincial | 167 | 3 | 38 | 39 | 28 | 35 | 32 |
| Suyahu Lake Wetland | Inland wetland | 20010606 | Provincial | 167 | 0 | 122 | 130 | 110 | 117 | 124 |
| Longzhou Qinglong Mountain | Forest ecosystem | 19820608 | Provincial | 167.786 | 7 | 229 | 227 | 213 | 205 | 208 |
| Haixing Wetland and Bird Reserve | Inland wetland | 20051117 | Provincial | 168 | 0 | 77 | 81 | 67 | 73 | 73 |
| Poyang Lake Icefish Reserve | Wild animal | 19800101 | Provincial | 171.03 | 1 | 203 | 211 | 213 | 198 | 209 |
| Lalin River Mouth Wetland | Inland wetland | 20091230 | Provincial | 171.79 | 0 | 86 | 94 | 96 | 91 | 94 |
| Mount Amu | Forest ecosystem | 19950417 | Provincial | 172.119 | 0 | 182 | 179 | 174 | 163 | 174 |
| Huangzihao Black Muntjac Reserve | Wild animal | 20010412 | Provincial | 173.562 | 0 | 122 | 137 | 122 | 126 | 129 |
| Xiling Mountain | Forest ecosystem | 19820608 | Provincial | 175.6 | 1 | 178 | 169 | 169 | 172 | 172 |
| Chaisong | Forest ecosystem | 20040427 | Provincial | 176.4 | 0 | 44 | 43 | 36 | 44 | 35 |
| Weifen River | Forest ecosystem | 20020620 | Provincial | 176.61 | 0 | 34 | 30 | 28 | 26 | 27 |
| Baicaowa | Steppe and meadow | 20071025 | Provincial | 176.8 | 0 | 49 | 50 | 43 | 47 | 42 |
| Tienshan Dutian River | Forest ecosystem | 19870101 | Provincial | 178.267 | 0 | 248 | 243 | 240 | 246 | 250 |
| Mount Mian | Forest ecosystem | 19930120 | Provincial | 178.27 | 10 | 53 | 54 | 44 | 59 | 46 |
| Mount Ya | Forest ecosystem | 19920920 | Provincial | 179 | 3 | 106 | 109 | 103 | 109 | 109 |
| Mount Huo | Forest ecosystem | 20020620 | Provincial | 179.602 | 1 | 50 | 47 | 44 | 54 | 42 |
| Xiaoheyan | Wild animal | 19980901 | Provincial | 180 | 0 | 27 | 27 | 22 | 25 | 28 |
| Dongning Niaoqing Mountain | Forest ecosystem | 20070112 | Provincial | 180.02 | 1 | 46 | 51 | 40 | 45 | 43 |
| Source of Mulan Stream | Forest ecosystem | 20121224 | Provincial | 180.25 | 0 | 243 | 236 | 229 | 234 | 221 |
| Nantian Lake | Inland wetland | 20020316 | Provincial | 180.932 | 4 | 125 | 129 | 120 | 120 | 126 |
| Han River Wetland | Inland wetland | 20091216 | Provincial | 181.06 | 15 | 140 | 142 | 130 | 138 | 141 |
| Mount Darong | Forest ecosystem | 20090120 | Provincial | 181.985 | 0 | 277 | 280 | 272 | 269 | 270 |
| Hanasuhai Lake | Inland wetland | 19961212 | Provincial | 183.16 | 0 | 31 | 40 | 35 | 33 | 30 |
| Labagoumen | Forest ecosystem | 19991213 | Provincial | 184.825 | 3 | 34 | 40 | 31 | 30 | 34 |
| Chaoshan | Forest ecosystem | 20020620 | Provincial | 185.6 | 0 | 54 | 59 | 47 | 51 | 47 |
| Hejiashan | Wild animal | 20051206 | Provincial | 186.421 | 0 | 21 | 26 | 21 | 23 | 21 |
| Source of Hun River | Forest ecosystem | 20030915 | Provincial | 189.31 | 0 | 31 | 40 | 35 | 34 | 32 |
| Nuozhadu | Forest ecosystem | 19961203 | Provincial | 189.97 | 1 | 187 | 186 | 178 | 181 | 181 |
| Chai River | Forest ecosystem | 20001231 | Provincial | 190.36 | 0 | 9 | 17 | 11 | 8 | 7 |
| Meitan Baimianshui | Forest ecosystem | 20011220 | Provincial | 191.73 | 0 | 118 | 128 | 105 | 117 | 123 |
| Dongsheng | Inland wetland | 20040901 | Provincial | 192.44 | 0 | 16 | 17 | 18 | 16 | 18 |
| Hulan River Mouth Wetland | Inland wetland | 20080114 | Provincial | 193.02 | 0 | 78 | 80 | 75 | 74 | 76 |
| Shuangyang River | Inland wetland | 20110309 | Provincial | 194.6 | 0 | 27 | 29 | 22 | 27 | 25 |
| Yellow River Three Gorges Wetland | Inland wetland | 19950630 | Provincial | 195 | 1 | 49 | 52 | 40 | 49 | 47 |
| Qingtongxia Reservoir Region | Inland wetland | 20020701 | Provincial | 195.73 | 0 | 34 | 30 | 30 | 32 | 32 |
| Kuancheng Dushan | Forest ecosystem | 20010101 | Provincial | 196.48 | 0 | 48 | 50 | 36 | 48 | 42 |
| Funing Tuoniang River | Forest ecosystem | 20020513 | Provincial | 197.11 | 0 | 225 | 221 | 222 | 217 | 217 |
| Piankou | Wild animal | 19930828 | Provincial | 197.3 | 0 | 63 | 65 | 57 | 51 | 66 |
| Nalin | Forest ecosystem | 19820608 | Provincial | 198.9 | 1 | 237 | 238 | 217 | 227 | 222 |
| Dulu River | Inland wetland | 20000801 | Provincial | 199.673 | 0 | 18 | 23 | 19 | 16 | 20 |
| Xuegong Ridge | Forest ecosystem | 20020620 | Provincial | 199.765 | 3 | 55 | 55 | 50 | 53 | 50 |
| Sizuolou | Forest ecosystem | 20021229 | Provincial | 199.97 | 0 | 71 | 74 | 62 | 73 | 59 |
| Nanpeng Archipelago | Wild animal | 20040316 | Provincial | 200 | 0 | 0 | 0 | 0 | 0 | 0 |
| Laoshan | Forest ecosystem | 20091216 | Provincial | 203.17 | 1 | 33 | 28 | 26 | 31 | 28 |
| Wanghu Lake Wetland | Inland wetland | 20010625 | Provincial | 204.95 | 0 | 176 | 174 | 170 | 170 | 174 |
| Malipo Laoshan | Forest ecosystem | 20050120 | Provincial | 205 | 14 | 0 | 0 | 0 | 0 | 0 |
| Hongnisi | Forest ecosystem | 20051206 | Provincial | 207 | 4 | 54 | 58 | 46 | 54 | 54 |
| Maozhai | Wild animal | 20010101 | Provincial | 208 | 0 | 83 | 86 | 75 | 76 | 78 |
| Menggehan Mountain | Forest ecosystem | 19980520 | Provincial | 208.55 | 0 | 22 | 22 | 19 | 21 | 18 |
| Three Gorges Wanchao Mountain | Forest ecosystem | 20001008 | Provincial | 209.86 | 13 | 114 | 115 | 110 | 110 | 116 |
| Nüshan Lake | Inland wetland | 20060417 | Provincial | 210 | 0 | 121 | 135 | 112 | 119 | 116 |
| Huanglian Mountain – Xingwang | Forest ecosystem | 19820608 | Provincial | 210.355 | 9 | 227 | 220 | 209 | 208 | 204 |
| Shuangbao Mountain | Inland wetland | 20080512 | Provincial | 212.29 | 0 | 29 | 37 | 32 | 30 | 33 |
| Daban Camp | Forest ecosystem | 19991018 | Provincial | 212.464 | 5 | 121 | 131 | 129 | 129 | 142 |
| Dushan Source of Liujiang River Wetland | Inland wetland | 20130906 | Provincial | 212.657 | 1 | 169 | 159 | 162 | 156 | 163 |
| Hongqi Wetland | Inland wetland | 20080512 | Provincial | 212.83 | 0 | 21 | 19 | 17 | 25 | 18 |
| Zhangshiyan | Forest ecosystem | 20050920 | Provincial | 213.32 | 17 | 73 | 82 | 66 | 75 | 68 |
| Pingshan | Inland wetland | 20111223 | Provincial | 213.94 | 0 | 21 | 20 | 13 | 20 | 16 |
| Qidong North branch of the Yangtze Estuary | Wild animal | 19890101 | Provincial | 214.91 | 0 | 0 | 0 | 0 | 0 | 0 |
| Source of the Luan River Grassland | Steppe and meadow | 19971028 | Provincial | 215 | 0 | 18 | 19 | 17 | 14 | 17 |
| Tianzhu Mountain | Wild animal | 20040427 | Provincial | 216.85 | 0 | 75 | 78 | 74 | 76 | 72 |
| Luoji Mountain | Forest ecosystem | 19971101 | Provincial | 219 | 0 | 118 | 116 | 112 | 102 | 106 |
| Haba Snow Mountain | Forest ecosystem | 19840405 | Provincial | 219.08 | 10 | 78 | 81 | 69 | 75 | 82 |
| Zhayin River Wetland | Inland wetland | 19940101 | Provincial | 219.53 | 0 | 17 | 20 | 18 | 20 | 18 |
| Laohunao | Wild animal | 20000830 | Provincial | 220 | 0 | 128 | 142 | 144 | 139 | 132 |
| Dafeng Fort | Forest ecosystem | 19901101 | Provincial | 220.432 | 2 | 117 | 122 | 114 | 127 | 125 |
| Sunite | Wild plant | 20010110 | Provincial | 223.31 | 0 | 8 | 15 | 10 | 11 | 9 |
| Duerbin River | Inland wetland | 20111223 | Provincial | 223.75 | 0 | 11 | 14 | 11 | 13 | 9 |
| Tangyuan Heiyupao | Inland wetland | 20070608 | Provincial | 224.01 | 0 | 30 | 37 | 28 | 28 | 27 |
| Coastal Shelterbelt Forest | Forest ecosystem | 19980625 | Provincial | 227.772 | 8 | 150 | 165 | 150 | 155 | 160 |
| Yunding Mountain | Forest ecosystem | 20020620 | Provincial | 230.292 | 0 | 29 | 32 | 24 | 26 | 26 |
| Source of the Sushui River | Forest ecosystem | 20020620 | Provincial | 231.44 | 1 | 58 | 60 | 54 | 55 | 56 |
| Laba River | Wild animal | 19630402 | Provincial | 234.373 | 8 | 106 | 108 | 109 | 112 | 115 |
| Wudantala | Desert ecosystem | 20011227 | Provincial | 234.71 | 0 | 16 | 20 | 20 | 18 | 13 |
| Lingchuan Southern Yew | Wild plant | 20020620 | Provincial | 235.652 | 1 | 66 | 65 | 59 | 65 | 64 |
| Baipo Mountain | Forest ecosystem | 20010617 | Provincial | 236.2 | 0 | 124 | 114 | 111 | 105 | 106 |
| Xiayong | Forest ecosystem | 20000816 | Provincial | 236.93 | 0 | 48 | 50 | 38 | 49 | 39 |
| Yixian Paleontological Fossils | Ancient organism remains | 20021207 | Provincial | 238 | 0 | 55 | 71 | 56 | 55 | 58 |
| Yaojingzi Sheepgrass Steppe | Steppe and meadow | 19861118 | Provincial | 238 | 0 | 25 | 26 | 23 | 22 | 26 |
| Heilongjiang Yinlong River | Inland wetland | 20110714 | Provincial | 242.17 | 0 | 19 | 16 | 14 | 18 | 16 |
| Source of the Yitong River | Forest ecosystem | 20121221 | Provincial | 242.57 | 0 | 42 | 53 | 53 | 55 | 50 |
| Yele | Wild animal | 19930828 | Provincial | 242.93 | 0 | 103 | 98 | 104 | 100 | 110 |
| Qiaoshan | Forest ecosystem | 20091216 | Provincial | 246.508 | 0 | 44 | 46 | 38 | 42 | 42 |
| Shariwendu | Forest ecosystem | 19991010 | Provincial | 247.4 | 0 | 14 | 12 | 8 | 12 | 9 |
| Lingjinggou | Forest ecosystem | 20020620 | Provincial | 249.2 | 1 | 142 | 147 | 137 | 135 | 132 |
| Guangwu Mountain | Forest ecosystem | 19960101 | Provincial | 249.88 | 1 | 79 | 87 | 86 | 85 | 92 |
| Fanzhi Abies nephrolepis Reserve | Forest ecosystem | 20020620 | Provincial | 250.494 | 1 | 46 | 44 | 35 | 42 | 46 |
| Simian Mountain | Forest ecosystem | 19880516 | Provincial | 252.69 | 12 | 131 | 140 | 130 | 134 | 135 |
| Baicaopo | Inland wetland | 19990325 | Provincial | 255.974 | 0 | 111 | 111 | 106 | 100 | 111 |
| Tiankeng Difeng | Geological formation | 19981210 | Provincial | 258.193 | 9 | 116 | 121 | 116 | 121 | 128 |
| Yulong Snow Mountain | Forest ecosystem | 19840405 | Provincial | 260 | 1 | 90 | 89 | 86 | 85 | 90 |
| Huachuan Wetland | Inland wetland | 20040901 | Provincial | 261.99 | 0 | 21 | 27 | 24 | 20 | 24 |
| Bayinengger Desert | Wild plant | 19980101 | Provincial | 262.096 | 0 | 14 | 16 | 8 | 11 | 13 |
| Bailixia Gorge | Wild animal | 19990525 | Provincial | 262.6 | 1 | 90 | 97 | 93 | 99 | 103 |
| Fujin Riverside Wetland | Inland wetland | 19880901 | Provincial | 263.36 | 0 | 33 | 36 | 34 | 31 | 36 |
| Taian | Forest ecosystem | 20040427 | Provincial | 263.548 | 2 | 79 | 83 | 75 | 80 | 78 |
| Haifeng | Inland wetland | 20020513 | Provincial | 266.1 | 0 | 182 | 185 | 177 | 159 | 162 |
| Ganchazi | Inland wetland | 20111223 | Provincial | 266.15 | 0 | 11 | 11 | 8 | 12 | 8 |
| Jintang Kongyu | Wild animal | 19951108 | Provincial | 269.086 | 3 | 63 | 61 | 57 | 61 | 60 |
| Upper Reaches of the Fen River | Forest ecosystem | 20020620 | Provincial | 270 | 3 | 36 | 38 | 34 | 39 | 37 |
| Tiger Jump | Forest ecosystem | 19820608 | Provincial | 270.075 | 23 | 197 | 202 | 196 | 189 | 194 |
| Xinluhai | Wild animal | 19951108 | Provincial | 270.38 | 0 | 11 | 12 | 14 | 14 | 10 |
| Wuyuer River – Shuangyang River | Inland wetland | 20070806 | Provincial | 270.79 | 0 | 21 | 25 | 19 | 20 | 27 |
| Cuiyun Corridor Ancient Cypress | Wild plant | 20000314 | Provincial | 271.55 | 9 | 131 | 129 | 122 | 115 | 135 |
| Xialei | Forest ecosystem | 19820608 | Provincial | 271.85 | 1 | 225 | 226 | 213 | 208 | 208 |
| Yibicuo Wetland | Inland wetland | 20040101 | Provincial | 272.757 | 0 | 24 | 30 | 25 | 29 | 24 |
| Tiebu | Wild animal | 19650601 | Provincial | 274.08 | 13 | 20 | 16 | 16 | 17 | 18 |
| Maqu Tibetan Plateau Indigenous Fish Reserve | Wild animal | 20050202 | Provincial | 274.16 | 0 | 10 | 12 | 14 | 11 | 13 |
| Yingxian Southern Mountain | Forest ecosystem | 20020620 | Provincial | 274.256 | 0 | 37 | 34 | 29 | 30 | 30 |
| Mohe Dog Bilberry Reserve | Wild plant | 20131119 | Provincial | 278.29 | 0 | 8 | 11 | 6 | 11 | 8 |
| Wutaishan Rhesus Macaque Reserve | Wild animal | 20010228 | Provincial | 279 | 3 | 86 | 98 | 91 | 95 | 95 |
| Ganluo Ma’anshan | Forest ecosystem | 20010621 | Provincial | 279.81 | 0 | 100 | 102 | 99 | 95 | 101 |
| Zhubalong | Wild animal | 19940601 | Provincial | 281.98 | 2 | 20 | 21 | 15 | 28 | 19 |
| Pingwu Xiaohegou | Wild animal | 19930828 | Provincial | 282.27 | 0 | 53 | 52 | 44 | 38 | 49 |
| Wildman Valley | Forest ecosystem | 20030805 | Provincial | 285.17 | 2 | 92 | 98 | 88 | 87 | 93 |
| Shuangheer Wetland | Wild animal | 20011217 | Provincial | 287.6 | 0 | 18 | 24 | 19 | 16 | 14 |
| Menlu River | Inland wetland | 20060703 | Provincial | 288.37 | 0 | 17 | 19 | 17 | 17 | 18 |
| Daxiang Ridge | Wild animal | 20030401 | Provincial | 290 | 3 | 119 | 118 | 124 | 117 | 123 |
| Guanwu Mountain | Forest ecosystem | 20010508 | Provincial | 292.53 | 3 | 125 | 123 | 117 | 115 | 126 |
| Baofeng Mountain | Wild animal | 20020801 | Provincial | 294.845 | 1 | 69 | 76 | 71 | 65 | 77 |
| Baiyangdian Wetland | Inland wetland | 20021106 | Provincial | 296.96 | 1 | 90 | 105 | 85 | 99 | 90 |
| Hesige Nuur | Inland wetland | 20000829 | Provincial | 297.69 | 0 | 8 | 9 | 10 | 6 | 9 |
| Shimen Mountain | Forest ecosystem | 20030701 | Provincial | 300.49 | 5 | 70 | 67 | 62 | 63 | 62 |
| Ulan Butong | Steppe and meadow | 19980716 | Provincial | 300.89 | 0 | 10 | 10 | 11 | 11 | 9 |
| Aolong | Inland wetland | 20140214 | Provincial | 304.85 | 0 | 31 | 35 | 25 | 29 | 29 |
| Dongxing Meadow Steppe | Steppe and meadow | 20101008 | Provincial | 305.29 | 0 | 21 | 22 | 16 | 16 | 18 |
| Dongyanggou | Wild animal | 20010701 | Provincial | 307.6 | 0 | 70 | 81 | 65 | 60 | 67 |
| Xiaerxili | Forest ecosystem | 20000616 | Provincial | 314 | 5 | 17 | 22 | 17 | 19 | 21 |
| Laotou Mountain | Forest ecosystem | 19970825 | Provincial | 314.42 | 0 | 12 | 15 | 11 | 8 | 10 |
| Qiqihar Riverside Wetland | Inland wetland | 20101102 | Provincial | 316.75 | 0 | 72 | 86 | 80 | 79 | 80 |
| Kasha Lake | Inland wetland | 19840101 | Provincial | 317 | 3 | 19 | 19 | 17 | 23 | 20 |
| Heishui River | Wild animal | 19930828 | Provincial | 317.9 | 0 | 166 | 176 | 169 | 171 | 176 |
| Yushi | Forest ecosystem | 20010802 | Provincial | 319.15 | 0 | 63 | 63 | 58 | 55 | 56 |
| Wangzi Mountain Pheasants Reserve | Wild animal | 19820608 | Provincial | 322.09 | 2 | 173 | 168 | 158 | 153 | 159 |
| Xionger Mountain | Forest ecosystem | 20041119 | Provincial | 325.293 | 8 | 82 | 81 | 78 | 78 | 75 |
| Yudaokou | Steppe and meadow | 20020529 | Provincial | 326.2 | 0 | 16 | 17 | 15 | 15 | 15 |
| Central Mountain | Forest ecosystem | 20020620 | Provincial | 326.711 | 0 | 60 | 60 | 46 | 51 | 55 |
| Zhaodong Riverside Wetland | Inland wetland | 20030312 | Provincial | 332.595 | 0 | 95 | 93 | 103 | 92 | 95 |
| Shengguozhuang Giant Panda | Wild animal | 20001025 | Provincial | 337 | 0 | 93 | 93 | 93 | 88 | 97 |
| Wusitu | Forest ecosystem | 19920101 | Provincial | 338.23 | 0 | 33 | 43 | 31 | 34 | 34 |
| Jinhua Mountain – Henglingzi Brown Eared Pheasant | Wild animal | 20031230 | Provincial | 339.4 | 4 | 56 | 62 | 50 | 53 | 49 |
| Hainan White Pearl Mussel | Wild animal | 19830428 | Provincial | 343 | 0 | 0 | 0 | 0 | 0 | 0 |
| Motian Ridge | Forest ecosystem | 20120120 | Provincial | 345.091 | 6 | 57 | 66 | 51 | 62 | 48 |
| Beidagang Wetland | Inland wetland | 19990824 | Provincial | 348.87 | 0 | 114 | 130 | 125 | 117 | 111 |
| Huyuan Cliosenia arbutifolia Reserve | Wild plant | 20110111 | Provincial | 349.54 | 0 | 12 | 13 | 13 | 13 | 9 |
| Huanglong Mountain | Forest ecosystem | 20040427 | Provincial | 351.77 | 1 | 44 | 41 | 36 | 42 | 39 |
| Tieqiao Mountain | Forest ecosystem | 20020620 | Provincial | 353.517 | 0 | 40 | 36 | 32 | 34 | 31 |
| Yinhe Mountain | Forest ecosystem | 20120120 | Provincial | 362.109 | 5 | 36 | 37 | 26 | 32 | 33 |
| Wawu Mountain | Wild animal | 19930828 | Provincial | 364.901 | 2 | 151 | 165 | 158 | 149 | 151 |
| Bei’an | Inland wetland | 20061025 | Provincial | 365.05 | 0 | 17 | 20 | 17 | 21 | 17 |
| Gulin Huangjing | Forest ecosystem | 20020325 | Provincial | 365.22 | 6 | 132 | 144 | 122 | 130 | 133 |
| Qindeli Huso dauricus Reserve | Wild animal | 19981204 | Provincial | 366.63 | 0 | 17 | 20 | 20 | 15 | 17 |
| Huangqihai Wetland | Inland wetland | 19931015 | Provincial | 368.23 | 0 | 36 | 42 | 29 | 36 | 35 |
| Nanpeng River | Forest ecosystem | 19991013 | Provincial | 369.7 | 0 | 177 | 183 | 170 | 177 | 175 |
| Wujiao | Wild animal | 19930828 | Provincial | 370.14 | 0 | 37 | 34 | 29 | 31 | 37 |
| Jiangnan | Forest ecosystem | 20000929 | Provincial | 370.519 | 5 | 125 | 132 | 125 | 126 | 136 |
| Wuliangsuhai | Inland wetland | 19950101 | Provincial | 372 | 0 | 12 | 16 | 15 | 12 | 14 |
| Zhengzhou Yellow River Wetland | Inland wetland | 20041119 | Provincial | 374.414 | 1 | 168 | 185 | 168 | 169 | 175 |
| Cierbin River | Inland wetland | 20101229 | Provincial | 377.9 | 0 | 11 | 12 | 8 | 11 | 6 |
| Liangzi Lake Wetland | Inland wetland | 19990507 | Provincial | 379.463 | 1 | 186 | 180 | 179 | 181 | 189 |
| Dusitu River | Inland wetland | 20031126 | Provincial | 380.04 | 0 | 12 | 13 | 9 | 10 | 10 |
| Tianchi | Forest ecosystem | 19800609 | Provincial | 380.69 | 17 | 34 | 35 | 36 | 29 | 38 |
| Dular | Forest ecosystem | 19970415 | Provincial | 385.67 | 0 | 13 | 12 | 12 | 12 | 10 |
| Danjiangkou Reservoir Area | Inland wetland | 20030318 | Provincial | 386.305 | 17 | 153 | 157 | 137 | 144 | 156 |
| Leibo Mamize | Forest ecosystem | 20010301 | Provincial | 388 | 6 | 105 | 103 | 102 | 94 | 105 |
| Wulihushu | Inland wetland | 20040615 | Provincial | 388.82 | 0 | 9 | 15 | 12 | 10 | 11 |
| Mengxinnao | Forest ecosystem | 20020620 | Provincial | 390.467 | 0 | 47 | 45 | 38 | 39 | 35 |
| Shenxian Mountain | Inland wetland | 20010311 | Provincial | 391.14 | 0 | 28 | 30 | 22 | 36 | 29 |
| Ussuri River | Inland wetland | 20010111 | Provincial | 396.68 | 0 | 19 | 21 | 20 | 18 | 19 |
| Xinzhou Yunzhong Mountain | Forest ecosystem | 20020620 | Provincial | 398 | 0 | 51 | 63 | 55 | 58 | 56 |
| Dunhuang Yardang | Geological formation | 20010629 | Provincial | 398.4 | 0 | 5 | 5 | 5 | 6 | 5 |
| Lushi Chinese Giant Salamander Reserve | Wild animal | 19820703 | Provincial | 401.3 | 4 | 93 | 94 | 94 | 93 | 89 |
| Pangu River | Inland wetland | 20140214 | Provincial | 407.83 | 0 | 7 | 9 | 7 | 7 | 8 |
| Liupan Mountain | Forest ecosystem | 19820701 | Provincial | 410.79 | 12 | 58 | 64 | 52 | 57 | 54 |
| Duchang Migratory Bird Reserve | Wild animal | 19950101 | Provincial | 411 | 14 | 184 | 183 | 181 | 183 | 182 |
| Dongcuo Wetland | Inland wetland | 20020101 | Provincial | 411.732 | 0 | 6 | 7 | 5 | 8 | 7 |
| Erlian Basin Dinosaur Fossils | Ancient organism remains | 19960401 | Provincial | 412 | 0 | 7 | 11 | 9 | 8 | 8 |
| Huanggangliang | Forest ecosystem | 19991016 | Provincial | 416.54 | 0 | 16 | 21 | 18 | 17 | 16 |
| Wanba | Forest ecosystem | 19970402 | Provincial | 418.24 | 0 | 69 | 66 | 61 | 64 | 74 |
| Huamugou | Forest ecosystem | 19960802 | Provincial | 418.58 | 2 | 13 | 15 | 13 | 14 | 15 |
| Songshu Mountain | Forest ecosystem | 19990425 | Provincial | 423.77 | 1 | 17 | 19 | 15 | 17 | 15 |
| Caimu Mountain | Steppe and meadow | 19950910 | Provincial | 424.77 | 3 | 13 | 13 | 14 | 14 | 12 |
| Longtan | Forest ecosystem | 19820608 | Provincial | 428.484 | 16 | 197 | 198 | 179 | 176 | 186 |
| Hengling Lake | Inland wetland | 20020815 | Provincial | 430 | 0 | 160 | 168 | 166 | 171 | 166 |
| Nierji | Inland wetland | 20101102 | Provincial | 434.38 | 0 | 28 | 35 | 28 | 33 | 31 |
| Fuyu Floodplain Wetland | Inland wetland | 20090722 | Provincial | 442.25 | 0 | 57 | 63 | 57 | 59 | 58 |
| Qingshitan | Forest ecosystem | 19820608 | Provincial | 442.826 | 5 | 225 | 207 | 207 | 216 | 220 |
| Middle and Lower Reaches of the Yarkant River Wetland | Inland wetland | 20050101 | Provincial | 444.5 | 0 | 8 | 9 | 4 | 8 | 7 |
| Laoshan | Forest ecosystem | 20001122 | Provincial | 448.55 | 48 | 153 | 155 | 146 | 150 | 149 |
| Xunbiela River | Wild animal | 19821203 | Provincial | 450 | 0 | 20 | 18 | 15 | 21 | 15 |
| Source of the Liao River | Forest ecosystem | 20040326 | Provincial | 452.252 | 1 | 42 | 42 | 36 | 40 | 38 |
| Huangyuan | Forest ecosystem | 20000120 | Provincial | 454.38 | 0 | 11 | 15 | 14 | 13 | 11 |
| Shaanxi Yellow River Wetland | Inland wetland | 19960202 | Provincial | 459.86 | 1 | 105 | 107 | 93 | 110 | 106 |
| Pingyang River Wetland | Inland wetland | 20080512 | Provincial | 459.88 | 0 | 13 | 15 | 10 | 13 | 9 |
| Mu Us Sandy Land Sabina vulgaris Reserve | Desert ecosystem | 19970101 | Provincial | 466 | 0 | 15 | 15 | 14 | 13 | 16 |
| Dawangling | Forest ecosystem | 19820608 | Provincial | 477.286 | 0 | 234 | 230 | 222 | 221 | 217 |
| Yindian Mountain | Forest ecosystem | 19820608 | Provincial | 480 | 9 | 195 | 183 | 186 | 193 | 191 |
| Poyang Lake Spawning Ground of Crucian Carp and Carp | Wild animal | 19800101 | Provincial | 480 | 0 | 177 | 176 | 173 | 175 | 173 |
| Qitai Desert-Steppe | Desert ecosystem | 19860705 | Provincial | 493 | 0 | 13 | 15 | 10 | 14 | 12 |
| Bayin Hanggai | Desert ecosystem | 20000801 | Provincial | 496.5 | 0 | 9 | 11 | 7 | 10 | 8 |
| Suileng Numin River | Inland wetland | 20070112 | Provincial | 500.25 | 0 | 20 | 23 | 23 | 25 | 17 |
| Anqing Riverside Wetland | Inland wetland | 19951121 | Provincial | 503.32 | 0 | 220 | 213 | 218 | 217 | 215 |
| Huayang River Lake System | Inland wetland | 20131206 | Provincial | 504.96 | 0 | 182 | 178 | 182 | 180 | 186 |
| Yu River Golden Snub-nosed Monkey Reserve | Wild animal | 20020114 | Provincial | 510.58 | 2 | 65 | 73 | 65 | 57 | 62 |
| Jijiquan | Desert ecosystem | 20051228 | Provincial | 510.708 | 0 | 12 | 12 | 9 | 12 | 9 |
| Tongbiguan | Forest ecosystem | 19860320 | Provincial | 516.505 | 1 | 197 | 205 | 204 | 205 | 195 |
| Jifeng Mountain | Forest ecosystem | 20051228 | Provincial | 524.41 | 4 | 66 | 68 | 64 | 54 | 56 |
| Mazong Mountain Paleontological Fossils | Ancient organism remains | 19981201 | Provincial | 526.98 | 0 | 8 | 7 | 4 | 8 | 6 |
| Heyehua Wetland Rare Bird Reserve | Inland wetland | 20000928 | Provincial | 528.23 | 0 | 25 | 28 | 19 | 22 | 20 |
| Hongze Lake Eastern Wetland | Inland wetland | 20041124 | Provincial | 540 | 8 | 162 | 170 | 158 | 160 | 161 |
| Boyu River | Wild animal | 20061121 | Provincial | 548.617 | 6 | 51 | 52 | 38 | 39 | 47 |
| Huanglong Temple | Wild animal | 19830910 | Provincial | 550.505 | 1 | 39 | 44 | 36 | 38 | 36 |
| Caopo | Wild animal | 20010101 | Provincial | 556.121 | 5 | 100 | 93 | 106 | 102 | 101 |
| Bangong Co Wetland | Inland wetland | 20020101 | Provincial | 563.032 | 0 | 4 | 8 | 7 | 7 | 7 |
| Nemuer River Wetland | Inland wetland | 20070813 | Provincial | 563.04 | 1 | 31 | 35 | 29 | 33 | 32 |
| Xinjiang Fuhai County Jintasi Mountain | Steppe and meadow | 19860705 | Provincial | 567 | 0 | 0 | 0 | 0 | 0 | 0 |
| Suibin Wetland | Inland wetland | 20070608 | Provincial | 569.62 | 0 | 31 | 34 | 28 | 29 | 34 |
| Zhaoyuan Riverside Wetland | Inland wetland | 20080512 | Provincial | 578.7 | 0 | 46 | 54 | 40 | 50 | 41 |
| Yihuang South China Tiger | Wild animal | 19920606 | Provincial | 583 | 3 | 149 | 152 | 160 | 154 | 155 |
| Wulan River | Forest ecosystem | 20010101 | Provincial | 585.18 | 0 | 7 | 13 | 9 | 9 | 9 |
| Western Daming Mountain | Forest ecosystem | 19820608 | Provincial | 601 | 4 | 292 | 287 | 289 | 280 | 277 |
| Jiuding Mountain | Wild animal | 19980701 | Provincial | 616.4 | 1 | 151 | 164 | 149 | 154 | 155 |
| Daiqintala Acer pictum Reserve | Steppe and meadow | 19980815 | Provincial | 616.413 | 0 | 18 | 24 | 17 | 19 | 14 |
| Mo’erduo Mountain | Forest ecosystem | 19971008 | Provincial | 621.03 | 0 | 43 | 44 | 41 | 42 | 40 |
| Baolawendu | Inland wetland | 20021220 | Provincial | 621.9 | 0 | 18 | 21 | 20 | 17 | 14 |
| Sandagu | Wild animal | 20001229 | Provincial | 623.193 | 2 | 41 | 45 | 36 | 34 | 40 |
| Nuoshui River | Inland wetland | 19860101 | Provincial | 630 | 4 | 89 | 98 | 90 | 97 | 97 |
| Min County Shuangyan | Forest ecosystem | 20020114 | Provincial | 640 | 3 | 47 | 49 | 41 | 44 | 46 |
| Aru | Forest ecosystem | 20020910 | Provincial | 643.86 | 0 | 7 | 9 | 10 | 8 | 7 |
| Xinjiang Central Tianshan Gongnaisi Mountain | Steppe and meadow | 19860705 | Provincial | 650 | 0 | 15 | 24 | 21 | 21 | 18 |
| Kuerbin Wetland | Inland wetland | 20040101 | Provincial | 669.64 | 0 | 13 | 15 | 11 | 14 | 12 |
| Jiaqiao Ridge | Forest ecosystem | 19820608 | Provincial | 670 | 3 | 231 | 230 | 218 | 223 | 230 |
| Changma River | Desert ecosystem | 19960313 | Provincial | 682.5 | 0 | 9 | 8 | 6 | 7 | 5 |
| Sanggan River | Wild animal | 20020620 | Provincial | 695.834 | 1 | 45 | 50 | 42 | 48 | 46 |
| Yangtze Estuary Chinese Sturgeon Reserve | Wild animal | 20020427 | Provincial | 696 | 0 | 0 | 0 | 0 | 0 | 0 |
| Lingqiu Black Stork | Wild animal | 20020620 | Provincial | 715.92 | 1 | 41 | 41 | 30 | 36 | 37 |
| Dajia River | Inland wetland | 20040901 | Provincial | 719.32 | 0 | 21 | 22 | 22 | 16 | 19 |
| Ertan Bird Reserve | Wild animal | 20010325 | Provincial | 749.6 | 3 | 133 | 124 | 119 | 110 | 111 |
| Yunling | Forest ecosystem | 19980101 | Provincial | 758.94 | 1 | 122 | 114 | 115 | 114 | 116 |
| Shoucheng | Forest ecosystem | 19820608 | Provincial | 759 | 14 | 238 | 224 | 225 | 225 | 238 |
| Baiyang | Wild animal | 19930828 | Provincial | 767.1 | 0 | 63 | 67 | 58 | 59 | 63 |
| South Dongting Lake Wetland Waterfowl Reserve | Inland wetland | 19970714 | Provincial | 770 | 0 | 212 | 202 | 213 | 200 | 211 |
| Headwaters of Yichun River | Forest ecosystem | 20090101 | Provincial | 788.64 | 0 | 25 | 34 | 21 | 29 | 24 |
| Wula Mountain | Forest ecosystem | 19961008 | Provincial | 811.667 | 1 | 68 | 71 | 55 | 58 | 56 |
| Changqing | Forest ecosystem | 20100324 | Provincial | 827.41 | 0 | 7 | 9 | 7 | 8 | 8 |
| Chagangliang | Wild animal | 20051228 | Provincial | 830.536 | 7 | 47 | 48 | 34 | 36 | 41 |
| Maogaitu | Desert ecosystem | 20000315 | Provincial | 832.46 | 0 | 11 | 10 | 9 | 8 | 8 |
| Yuncheng Wetland | Inland wetland | 19930120 | Provincial | 868.61 | 5 | 122 | 125 | 114 | 131 | 121 |
| Hangjin Nuur | Inland wetland | 20000910 | Provincial | 883.39 | 0 | 26 | 30 | 25 | 29 | 27 |
| Lincang Lancang River | Forest ecosystem | 19990621 | Provincial | 895.04 | 4 | 203 | 209 | 200 | 201 | 204 |
| Baoding Valley | Wild animal | 19930828 | Provincial | 898.836 | 8 | 124 | 121 | 125 | 127 | 124 |
| Haiyang Mountain | Forest ecosystem | 19820608 | Provincial | 904 | 27 | 207 | 200 | 194 | 206 | 198 |
| Alxa Left Banner Dinosaur Fossil Reserve | Ancient organism remains | 19990609 | Provincial | 905.52 | 0 | 5 | 5 | 5 | 8 | 5 |
| Zezhou Rhesus Macaque Reserve | Wild animal | 20020620 | Provincial | 937.751 | 11 | 142 | 146 | 137 | 145 | 140 |
| Angzico–Maerxiaco Wetland | Inland wetland | 20100210 | Provincial | 940.405 | 0 | 7 | 9 | 6 | 8 | 7 |
| Erguna Wetland | Inland wetland | 19991115 | Provincial | 956.04 | 6 | 10 | 13 | 10 | 9 | 11 |
| Daya Bay Marine Resource | Wild animal | 19830401 | Provincial | 985 | 5 | 248 | 254 | 244 | 254 | 251 |
| Irtysh River Keketuo Sea Wetland | Inland wetland | 20050228 | Provincial | 990.4 | 0 | 26 | 23 | 27 | 28 | 30 |
| Shankou | Inland wetland | 20021018 | Provincial | 994.899 | 0 | 18 | 17 | 17 | 21 | 15 |
| Shiwei | Forest ecosystem | 20000428 | Provincial | 1025.59 | 1 | 10 | 11 | 9 | 9 | 8 |
| Xinyang Yellow-margined Box Turtle Reserve | Wild animal | 20040226 | Provincial | 1099.3 | 9 | 178 | 184 | 174 | 176 | 182 |
| Keluke Lake–Tosu Lake | Inland wetland | 20000523 | Provincial | 1150 | 1 | 10 | 13 | 11 | 10 | 9 |
| Source of the Pearl River | Forest ecosystem | 20001116 | Provincial | 1179.34 | 1 | 205 | 195 | 194 | 175 | 177 |
| Nuomuhong | Desert ecosystem | 20051017 | Provincial | 1180 | 0 | 8 | 10 | 9 | 8 | 8 |
| Yumen Nanshan | Wild animal | 20020114 | Provincial | 1240 | 0 | 36 | 30 | 29 | 31 | 24 |
| Weina River | Forest ecosystem | 19991130 | Provincial | 1255.64 | 0 | 11 | 14 | 12 | 9 | 10 |
| Pamir Plateau Wetland | Inland wetland | 20050101 | Provincial | 1256 | 1 | 20 | 25 | 21 | 23 | 23 |
| Nansi Lake | Wild animal | 19820101 | Provincial | 1275.47 | 62 | 195 | 198 | 186 | 177 | 182 |
| Bailong River Axia | Wild animal | 20041209 | Provincial | 1355.36 | 5 | 31 | 34 | 30 | 30 | 29 |
| Huolong Valley | Forest ecosystem | 19990512 | Provincial | 1396 | 0 | 14 | 16 | 17 | 21 | 18 |
| Taining Yuke | Forest ecosystem | 19991001 | Provincial | 1414.75 | 4 | 43 | 44 | 35 | 44 | 36 |
| Zharinanmu Co Wetland | Inland wetland | 20020101 | Provincial | 1429.82 | 0 | 5 | 7 | 9 | 8 | 9 |
| Etuoke Licorice Reserve | Wild plant | 20000318 | Provincial | 1447.62 | 0 | 20 | 18 | 14 | 14 | 18 |
| Gonggang Ridge | Wild animal | 20090918 | Provincial | 1478.44 | 0 | 29 | 29 | 24 | 30 | 28 |
| Luoxu | Wild animal | 19951108 | Provincial | 1553.5 | 1 | 5 | 9 | 10 | 9 | 8 |
| Miyaluo | Forest ecosystem | 19990106 | Provincial | 1607.32 | 13 | 82 | 79 | 82 | 80 | 83 |
| Elaeagnus Yard | Forest ecosystem | 20020114 | Provincial | 1634.04 | 0 | 17 | 17 | 18 | 15 | 13 |
| Manzetang | Inland wetland | 20001201 | Provincial | 1658.74 | 0 | 14 | 16 | 16 | 15 | 17 |
| Xionglongxi | Wild animal | 20000925 | Provincial | 1710.65 | 0 | 14 | 15 | 16 | 19 | 17 |
| Miaodao Archipelago Seal Reserve | Wild animal | 20010612 | Provincial | 1731 | 1 | 0 | 0 | 0 | 0 | 0 |
| Hailin Lotus Lake | Inland wetland | 19971226 | Provincial | 1900 | 2 | 38 | 48 | 43 | 39 | 38 |
| Hunshandake Sandy Land Sabina vulgaris Reserve | Desert ecosystem | 20020101 | Provincial | 1911.64 | 1 | 12 | 16 | 14 | 14 | 16 |
| Ziwuling Mountain | Forest ecosystem | 20050202 | Provincial | 2421.06 | 12 | 60 | 61 | 52 | 58 | 58 |
| Middle and Lower Reaches of the Shule River | Inland wetland | 20020114 | Provincial | 3242 | 2 | 15 | 17 | 19 | 18 | 16 |
| Badain Jaran | Desert ecosystem | 19970425 | Provincial | 4761.77 | 4 | 6 | 6 | 5 | 9 | 5 |
| Mazong Mountain Northern Wild Goat Reserve | Wild animal | 20010413 | Provincial | 4800 | 0 | 8 | 7 | 6 | 7 | 6 |
| Hulun Buir Grassland Mongolian Gazelle Reserve | Wild animal | 19980925 | Provincial | 5283.88 | 2 | 8 | 12 | 6 | 6 | 10 |
| Zhadatu Forest | Geological formation | 19990101 | Provincial | 5600 | 2 | 9 | 14 | 13 | 18 | 15 |
| Sources of the Two Rivers | Forest ecosystem | 20010909 | Provincial | 6759 | 0 | 0 | 0 | 0 | 0 | 0 |
| East Alxa | Desert ecosystem | 19960409 | Provincial | 6777.9 | 1 | 8 | 10 | 6 | 11 | 6 |
| Ulagai Wetland | Inland wetland | 20010103 | Provincial | 6959.49 | 0 | 11 | 11 | 11 | 9 | 9 |
| Badain Jaran Desert Lake | Desert ecosystem | 19990508 | Provincial | 7170.6 | 10 | 6 | 6 | 6 | 10 | 6 |
| Tengger Desert | Desert ecosystem | 19961010 | Provincial | 7217.07 | 1 | 42 | 57 | 41 | 51 | 45 |
| Qinghai Qilian Mountain | Forest ecosystem | 20051230 | Provincial | 8022.17 | 0 | 29 | 35 | 30 | 29 | 29 |
| Three Lakes of the Songhua River | Forest ecosystem | 19900213 | Provincial | 10294.57 | 12 | 68 | 72 | 69 | 76 | 70 |
| Nam Co | Inland wetland | 20010705 | Provincial | 10997.96 | 0 | 9 | 15 | 9 | 11 | 12 |
| Kalamaili Mountain | Wild animal | 19820408 | Provincial | 12871.44 | 0 | 33 | 35 | 34 | 37 | 33 |
| Taxkorgan Wildlife Reserve | Wild animal | 19840508 | Provincial | 15863 | 4 | 15 | 18 | 20 | 21 | 19 |
| Gongbu | Forest ecosystem | 20030430 | Provincial | 20149.81 | 15 | 42 | 54 | 44 | 56 | 61 |
| Xinjiang Central Kunlun | Wild animal | 20010915 | Provincial | 32000 | 0 | 7 | 7 | 5 | 7 | 6 |
| Wushanting Mud Volcano |  | 1992 | Provincial | 0.05 | 2 | 0 | 0 | 0 | 0 | 0 |
| Ping-Lin Taiwan Keteleeria |  | 1986 | Provincial | 0.35 | 7 | 0 | 0 | 0 | 0 | 0 |
| Kuantu |  | 1986 | Provincial | 0.55 | 0 | 273 | 271 | 283 | 279 | 269 |
| Danshuei River Mangrove |  | 1986 | Provincial | 0.76 | 0 | 0 | 0 | 0 | 0 | 0 |
| Taitung Hungyeh Village Taiwan Cycas |  | 1986 | Provincial | 2.9 | 1 | 217 | 242 | 219 | 233 | 222 |
| Hahpen |  | 1986 | Provincial | 3.33 | 1 | 242 | 245 | 253 | 249 | 252 |
| Yuan-Yang Lake |  | 1986 | Provincial | 3.74 | 0 | 233 | 220 | 228 | 228 | 226 |
| Jian-Shan Coast |  | 1987 | Provincial | 10.9 | 1 | 0 | 0 | 0 | 0 | 0 |
| Penghu Columnar Basalt |  | 1992 | Provincial | 14.9 | 0 | 0 | 0 | 0 | 0 | 0 |
| North Coast |  | 1987 | Provincial | 56.95 | 19 | 0 | 0 | 0 | 0 | 0 |
| Chuyunshan |  | 1992 | Provincial | 62.49 | 15 | 210 | 214 | 209 | 208 | 203 |
| Chatienshan |  | 1992 | Provincial | 77.6 | 3 | 252 | 242 | 250 | 252 | 234 |
| Yangmingshan |  | 1985 | Provincial | 114.55 | 34 | 0 | 0 | 0 | 0 | 0 |
| Northeast Coast |  | 1984 | Provincial | 137.25 | 27 | 0 | 0 | 0 | 0 | 0 |
| Kenting |  | 1984 | Provincial | 332.69 | 68 | 0 | 0 | 0 | 0 | 0 |
| Tawushan |  | 1987 | Provincial | 470 | 11 | 241 | 262 | 254 | 245 | 251 |
| Hua-Tung Coast |  | 1984 | Provincial | 534.7 | 15 | 0 | 0 | 0 | 0 | 0 |
| Shei-Pa |  | 1992 | Provincial | 768.5 | 21 | 221 | 207 | 208 | 221 | 211 |
| Taroko |  | 1986 | Provincial | 920 | 37 | 251 | 245 | 257 | 247 | 240 |
| Yushan |  | 1985 | Provincial | 1054.9 | 13 | 258 | 270 | 266 | 261 | 257 |

**Table S2. The 26 environmental and socioeconomic variables used for predicting the geographical distribution pattern of IAPs in China**

| variable | Interpretation |
| --- | --- |
| Population | Population density |
| GDP | Gross domestic product |
| Railway | Distance to the nearest railway |
| Capital | Distance to the nearest provincial capital |
| Highway | Distance to the nearest national highway |
| Expressway | Distance to the nearest expressway |
| Elevation | Elevation |
| BIO1 | Annual mean temperature |
| BIO2 | Mean diurnal range (max temp – min temp) (monthly average) |
| BIO3 | Isothermality (BIO1/BIO7) * 100 |
| BIO4 | Temperature seasonality |
| BIO5 | Maximum temperature of warmest month |
| BIO6 | Minimum temperature of coldest month |
| BIO7 | Temperature annual range (BIO5-BIO6) |
| BIO8 | Mean temperature of wettest quarter |
| BIO9 | Mean temperature of driest quarter |
| BIO10 | Mean temperature of warmest quarter |
| BIO11 | Mean temperature of coldest quarter |
| BIO12 | Annual precipitation |
| BIO13 | Precipitation of wettest month |
| BIO14 | Precipitation of driest month |
| BIO15 | Precipitation seasonality (coefficient of variation) |
| BIO16 | Precipitation of wettest quarter |
| BIO17 | Precipitation of driest quarter |
| BIO18 | Precipitation of warmest quarter |
| BIO19 | Precipitation of coldest quarter |
